# Supplementary material for: Multi-omics driven computational framework for cancer molecular subtype classification
Source: Springer Nature journal article supplement (doi:10.1038/s41598-025-32051-5), 2025-12-19
Supplement: MOESM1 [file 41598_2025_32051_MOESM1_ESM.pdf]

# Supplementary Information

## 1. How are the datasets of DNA methylation preprocessed?

Large datasets like HumanMethylation450 (HM450) and HumanMethylation27 (HM27) contain high-dimensional methylation data, measuring DNA methylation at 485,000 and 27,000 CpG sites, respectively. This results in datasets with an extremely high number of features, which can be computationally challenging to analyze directly. To overcome this, the TCGA-Assembler2 package in R (Wei et al., 2018) provides a streamlined preprocessing pipeline that reduces dimensionality while retaining biologically relevant information. The pipeline assumes that raw beta values have been preprocessed and normalized using external tools, such as SWAN (Subset-quantile Within Array Normalization) or BMIQ (Beta Mixture Quantile Normalization), which are specifically designed for Illumina methylation arrays. These normalization methods correct technical variations, such as batch effects and probe-specific biases, ensuring that the data are comparable across samples and platforms.

A critical step in reducing the high dimensionality of HM450 and HM27 data is the aggregation of methylation values at the gene level. TCGA-Assembler2 uses the `CalculateSingleValueMethylationData` function to summarize methylation beta values for specific genomic regions, such as promoter regions (e.g., TSS1500 and TSS200). For example, methylation levels within TSS1500 (1500 base pairs upstream of the transcription start site) and TSS200 (200 base pairs upstream) are averaged to produce a single gene-level beta value. This approach reduces the number of features from hundreds of thousands of CpG sites to a more manageable number of genes, while preserving the biological significance of methylation patterns in regulatory regions. By focusing on promoter regions, which are critical for gene regulation, this step ensures that the summarized data are both interpretable and relevant for downstream analysis.

Finally, TCGA-Assembler2 addresses the challenge of batch effects and technical variations, which are common in large-scale methylation studies. While the package does not include built-in functions for batch effect correction or quality control (QC), it assumes that users will perform these steps externally using tools like ComBat (for batch effect correction) or the minfi package (for QC). The output of this preprocessing pipeline is a gene-level methylation matrix, where rows represent genes and columns represent samples. This matrix is significantly smaller in size compared to the original dataset, making it computationally efficient for downstream tasks such as identifying differentially methylated genes (DMGs), clustering samples, or integrating methylation data with other omics data. By reducing the dimensionality and improving data quality, TCGA-Assembler2 enables researchers to extract meaningful insights from HM450 and HM27 datasets without being overwhelmed by the high number of features.

[1] Wei, L., Jin, Z., Yang, S., Xu, Y., Zhu, Y., & Ji, Y. (2018). TCGA-assembler 2: software pipeline for retrieval and processing of TCGA/CPTAC data. *Bioinformatics* (Oxford, England), 34(9), 1615–1617. <https://doi.org/10.1093/bioinformatics/btx812>

2. What are the standard preprocessing methods used?
  - a. Samples without valid subtype labels were removed.
  - b. Samples containing >80% zero or missing values were excluded to avoid sparsity-driven biases.
  - c. Classes with fewer than 10 samples were removed to prevent unreliable model training.

Supplementary Table S1: A comprehensive collection of 153 benchmark datasets for cancer molecular subtype classification that encompasses 20 distinct cancers and spans 17 unique data configurations across 8 omics modalities.

| Cancer | Modality | Configuration | Classes | Total Samples | Samples Per Class | No of Features |
|--------|----------|---------------|---------|---------------|-------------------|----------------|
|--------|----------|---------------|---------|---------------|-------------------|----------------|

|      |               |                           |   |     |                                                                                 |        |
|------|---------------|---------------------------|---|-----|---------------------------------------------------------------------------------|--------|
| PRAD | miRNA         | miRNA HiSeq gene          | 8 | 330 | ERG: 151, SPOP: 37, 4 FLI1: 4, Other: 85, FOXA1: 9, ETV1: 27, ETV4: 14, IDH1: 3 | 633    |
|      | RNASeq        | HiSeqV2                   | 8 | 333 | ETV1: 28, ERG: 152, Other: 86, IDH1: 3, ETV4: 14, SPOP: 37, FOXA1: 9, 4 FLI1: 4 | 20530  |
|      |               | HiSeqV2 PANCAN            | 8 | 333 | ETV1: 28, ERG: 152, Other: 86, IDH1: 3, ETV4: 14, SPOP: 37, FOXA1: 9, 4 FLI1: 4 | 20530  |
|      |               | HiSeqV2 percentile        | 8 | 333 | ETV1: 28, ERG: 152, Other: 86, IDH1: 3, ETV4: 14, SPOP: 37, FOXA1: 9, 4 FLI1: 4 | 20501  |
|      | Exon          | HiSeqV2 exon              | 8 | 333 | ETV1: 28, ERG: 152, Other: 86, IDH1: 3, ETV4: 14, SPOP: 37, FOXA1: 9, 4 FLI1: 4 | 239322 |
|      | RPPA          | RPPA                      | 8 | 250 | SPOP: 23, ERG: 116, IDH1: 3, ETV1: 23, Other: 65, FOXA1: 7, ETV4: 10, 4 FLI1: 3 | 218    |
|      | SNP/<br>INDEL | mc3 gene level            | 8 | 331 | ERG: 151, Other: 86, ETV1: 28, FOXA1: 9, 4 FLI1: 3, ETV4: 14, IDH1: 3, SPOP: 37 | 40543  |
|      | CNV           | Gistic2 all data by genes | 8 | 333 | ERG: 152, Other: 86, ETV1: 28, FOXA1: 9, 4 FLI1: 4, ETV4: 14, IDH1: 3, SPOP: 37 | 24776  |
|      |               | Gistic2 all thresholded   | 8 | 333 | ERG: 152, Other: 86, ETV1: 28, FOXA1: 9, 4 FLI1: 4, ETV4: 14, IDH1: 3, SPOP: 37 | 24776  |
|      | RPPA          | RPPA                      | 5 | 311 | CIN: 178, GS: 39, MSI: 62, EBV: 26, HM SNV: 6                                   | 218    |
|      | SNP/<br>INDEL | mc3 gene level            | 5 | 383 | CIN: 223, GS: 50, MSI: 73, EBV: 30, HM SNV: 7                                   | 40543  |

|      |               |                           |   |     |                                                                                  |        |
|------|---------------|---------------------------|---|-----|----------------------------------------------------------------------------------|--------|
| STAD | CNV           | Gistic2 all data by genes | 5 | 383 | CIN: 223, GS: 50, MSI: 73, EBV: 30, HM SNV: 7                                    | 24776  |
|      |               | Gistic2 all thresholded   | 5 | 383 | CIN: 223, GS: 50, MSI: 73, EBV: 30, HM SNV: 7                                    | 24776  |
|      | Methylation   | Human Methylation450      | 5 | 343 | 'GL.CIN': 202, 'GLEBV': 59, 'GL.GS': 29, 'GL.MSI': 46, HM SNV:7                  | 20789  |
| PCPG | miRNA         | miRNA HiSeq gene          | 4 | 173 | Kinase signaling: 68, Wnt altered: 22, Pseudohypoxia: 61, Cortical admixture: 22 | 796    |
|      | RNASeq        | HiSeqV2                   | 4 | 173 | Kinase signaling: 68, Pseudohypoxia: 61, Cortical admixture: 22, Wnt altered: 22 | 20530  |
|      |               | HiSeqV2 PANCAN            | 4 | 173 | Kinase signaling: 68, Pseudohypoxia: 61, Cortical admixture: 22, Wnt altered: 22 | 20530  |
|      |               | HiSeqV2 percentile        | 4 | 173 | Kinase signaling: 68, Pseudohypoxia: 61, Cortical admixture: 22, Wnt altered: 22 | 20501  |
|      | Exon          | HiSeqV2 exon              | 4 | 173 | Kinase signaling: 68, Pseudohypoxia: 61, Cortical admixture: 22, Wnt altered: 22 | 239322 |
|      | RPPA          | RPPA                      | 4 | 76  | Pseudohypoxia: 25, Kinase signaling: 34, Wnt altered: 10, Cortical admixture: 7  | 219    |
|      | SNP/<br>INDEL | PCPG mc3 gene level       | 4 | 173 | Kinase signaling: 68, Wnt altered: 22, Pseudohypoxia: 61, Cortical admixture: 22 | 40543  |
|      | CNV           | Gistic2 all data by genes | 4 | 159 | Kinase signaling: 62, Wnt altered: 21, Pseudohypoxia: 54, Cortical admixture: 22 | 24776  |

|      |             |                           |   |     |                                                                                  |       |
|------|-------------|---------------------------|---|-----|----------------------------------------------------------------------------------|-------|
|      |             | Gistic2 all thresholded   | 4 | 159 | Kinase signaling: 62, Wnt altered: 21, Pseudohypoxia: 54, Cortical admixture: 22 | 24776 |
| HNSC | RPPA        | RPPA                      | 4 | 200 | Mesenchymal: 58, Classical: 40, Basal: 66, Atypical: 36                          | 131   |
|      | RPPA        | RPPA                      | 4 | 200 | Basal: 66, Mesenchymal: 58, Atypical: 36, Classical: 40                          | 238   |
|      | SNP/INDEL   | mc3 gene level            | 4 | 277 | Mesenchymal: 74, Basal: 87, Atypical: 67, Classical: 49                          | 40543 |
|      | CNV         | Gistic2 all thresholded   | 4 | 279 | Mesenchymal: 75, Basal: 87, Atypical: 68, Classical: 49                          | 24776 |
|      |             | Gistic2 all data by genes | 4 | 279 | Mesenchymal: 75, Basal: 87, Atypical: 68, Classical: 49                          | 24776 |
|      | Methylation | Human Methylation450      | 4 | 279 | Mesenchymal: 75, Basal: 49, Atypical: 87, Classical: 68                          | 20789 |
| BLCA | miRNA       | miRNA HiSeq gene          | 4 | 129 | BLCA.2: 42, BLCA.1: 41, BLCA.3: 31, BLCA.4: 15                                   | 810   |
|      | RNASeq      | HiSeqV2                   | 4 | 129 | BLCA.2: 42, BLCA.4: 15, BLCA.3: 31, BLCA.1: 41                                   | 20530 |
|      |             | HiSeqV2 PANCAN            | 4 | 129 | BLCA.2: 42, BLCA.4: 15, BLCA.3: 31, BLCA.1: 41                                   | 20530 |
|      |             | HiSeqV2 percentile        | 4 | 129 | BLCA.2: 42, BLCA.4: 15, BLCA.3: 31, BLCA.1: 41                                   | 20501 |

|      |               |                           |   |     |                                                                                              |       |
|------|---------------|---------------------------|---|-----|----------------------------------------------------------------------------------------------|-------|
|      | Exon          | HiSeqV2 exon              | 4 | 129 | BLCA.2: 42, BLCA.1: 41, BLCA.3: 31, BLCA.4: 15                                               | 78722 |
|      | Methylation   | Human Methylation450      | 4 | 129 | BLCA.2: 42, BLCA.1: 41, BLCA.3: 31, BLCA.4: 15                                               | 20789 |
|      | RPPA          | RPPA                      | 4 | 118 | BLCA.1: 36, BLCA.4: 15, BLCA.2: 38, BLCA.3: 29                                               | 131   |
|      |               | RPPA                      | 4 | 118 | BLCA.2: 38, BLCA.1: 36, BLCA.3: 29, BLCA.4: 15                                               | 222   |
|      | SNP/<br>INDEL | mc3 gene level            | 4 | 129 | BLCA.1: 41, BLCA.4: 15, BLCA.2: 42, BLCA.3: 31                                               | 40543 |
|      | CNV           | Gistic2 all thresholded   | 4 | 126 | BLCA.1: 41, BLCA.4: 15, BLCA.2: 41, BLCA.3: 29                                               | 24776 |
|      |               | Gistic2 all data by genes | 4 | 126 | BLCA.1: 41, BLCA.4: 15, BLCA.2: 41, BLCA.3: 29                                               | 24776 |
| SKCM | CNV           | Gistic2 all thresholded   | 5 | 266 | RAS Hotspot Mutants: 81, Triple WT: 38, BRAF Hotspot Mutants: 118, : 6, NF1 Any Mutants: 23  | 24776 |
|      | Methylation   | Human Methylation450      | 5 | 333 | RAS Hotspot Mutants: 92, Triple WT: 46, BRAF Hotspot Mutants: 150, : 17, NF1 Any Mutants: 28 | 20789 |
| COAD | miRNA         | miRNA GA gene             | 4 | 100 | HM SNV: 4, GS: 17, CIN: 62, MSI: 17                                                          | 617   |
|      | RNASeq        | GAV2                      | 4 | 95  | CIN: 59, MSI: 16, GS: 16, HM SNV: 4                                                          | 20530 |

|      |               |                           |   |     |                                                        |        |
|------|---------------|---------------------------|---|-----|--------------------------------------------------------|--------|
|      | Exon          | GAV2 exon                 | 4 | 95  | CIN: 59, MSI: 16, GS: 16, HM SNV: 4                    | 239322 |
|      | RPPA          | RPPA                      | 4 | 245 | CIN: 152, MSI: 45, GS: 43, HM SNV: 5                   | 131    |
|      | SNP/<br>INDEL | mc3 gene level            | 4 | 268 | CIN: 178, MSI: 50, GS: 34, HM SNV: 6                   | 40543  |
|      | CNV           | Gistic2 all thresholded   | 4 | 341 | CIN: 226, MSI: 60, GS: 49, HM SNV: 6                   | 24776  |
|      |               | Gistic2 all data by genes | 4 | 341 | CIN: 226, MSI: 60, GS: 49, HM SNV: 6                   | 24776  |
| LAML | miRNA         | miRNA GA gene             | 8 | 187 | NA: 9, 7: 20, 4: 37, 1: 14, 2: 21, 6: 35, 3: 18, 5: 33 | 544    |
|      | RNASeq        | HiSeqV2 PANCAN            | 7 | 172 | 3: 18, 4: 35, 1: 14, 5: 32, 6: 35, 2: 20, 7: 18        | 20530  |
|      |               | GA                        | 7 | 178 | 6: 35, 5: 33, 1: 14, 2: 21, 7: 20, 4: 37, 3: 18        | 20113  |
|      |               | HiSeqV2 percentile        | 7 | 172 | 3: 18, 4: 35, 1: 14, 5: 32, 6: 35, 2: 20, 7: 18        | 20501  |
|      |               | HiSeqV2                   | 7 | 172 | 3: 18, 4: 35, 1: 14, 5: 32, 6: 35, 2: 20, 7: 18        | 20530  |
|      | Exon          | GA exon                   | 7 | 178 | 3: 18, 4: 37, 1: 14, 5: 33, 6: 35, 2: 20, 7: 20        | 219296 |

|      |               |                           |   |     |                                                                                                |        |
|------|---------------|---------------------------|---|-----|------------------------------------------------------------------------------------------------|--------|
|      |               | HiSeqV2 exon              | 7 | 172 | 3: 18, 4: 35, 1: 14, 5: 32, 6: 35, 2: 20, 7: 18                                                | 155775 |
|      | SNP/<br>INDEL | mutation wustl gene       | 8 | 184 | NA: 9, 3: 18, 5: 32, 4: 37, 6: 34, 1: 13, 2: 21, 7: 20                                         | 43785  |
|      | CNV           | Gistic2 all data by genes | 8 | 178 | 3: 18, 5: 31, 4: 36, 6: 33, 1: 13, 2: 19, 7: 20, NA: 8                                         | 24776  |
|      |               | Gistic2 all thresholded   | 8 | 178 | 3: 18, 5: 31, 4: 36, 6: 33, 1: 13, 2: 19, 7: 20, NA: 8                                         | 24776  |
| LGG  | SNP/<br>INDEL | LGG mc3 gene level        | 6 | 511 | G high: 234, Mesenchymal like: 45, Codel: 173, Classic like: 23, G low: 12, PA like: 24        | 40543  |
|      | CNV           | Gistic2 all thresholded   | 7 | 513 | G high: 233, Mesenchymal like: 45, Codel: 172, Classic like: 23, G low: 12, PA like: 25, NA: 3 | 24776  |
|      |               | Gistic2 all data by genes | 7 | 513 | G high: 233, Mesenchymal like: 45, Codel: 172, Classic like: 23, G low: 12, PA like: 25, NA: 3 | 24776  |
| READ | miRNA         | miRNA HiSeq gene          | 4 | 84  | CIN: 74, MSI: 2, GS: 6, HM SNV: 2                                                              | 773    |
|      | RPPA          | RPPA                      | 4 | 89  | CIN: 77, GS: 7, MSI: 3, HM SNV: 2                                                              | 222    |
|      | RPPA          | RPPA                      | 4 | 88  | CIN: 76, GS: 7, HM SNV: 2, MSI: 3                                                              | 131    |
|      | SNP/<br>INDEL | mc3 gene level            | 4 | 84  | CIN: 74, GS: 6, MSI: 2, HM SNV: 2                                                              | 40543  |

|             |                      |                           |     |                                                      |                                                       |       |
|-------------|----------------------|---------------------------|-----|------------------------------------------------------|-------------------------------------------------------|-------|
|             | CNV                  | Gistic2 all data by genes | 4   | 118                                                  | CIN: 102, GS: 9, HM SNV: 4, MSI: 3                    | 24776 |
|             |                      | Gistic2 all thresholded   | 4   | 118                                                  | CIN: 102, GS: 9, HM SNV: 4, MSI: 3                    | 24776 |
| UCEC        | miRNA                | miRNA GA gene             | 5   | 126                                                  | CN LOW: 53, MSI: 32, NA: 6, POLE: 16, CN HIGH: 19     | 618   |
|             | RPPA                 | RPPA                      | 5   | 431                                                  | CN HIGH: 126, MSI: 95, POLE: 68, CN LOW: 116, NA: 26  | 222   |
|             |                      | RPPA                      | 5   | 397                                                  | POLE: 61, NA: 26, CN HIGH: 110, MSI: 89, CN LOW: 111  | 131   |
|             | SNP/<br>INDEL        | mc3 gene level            | 5   | 444                                                  | CN HIGH: 143, CN LOW: 115, POLE: 69, NA: 15, MSI: 102 | 40543 |
|             | CNV                  | Gistic2 all data by genes | 5   | 530                                                  | CN HIGH: 160, CN LOW: 144, POLE: 79, MSI: 124, NA: 23 | 24776 |
|             |                      | Gistic2 all thresholded   | 5   | 530                                                  | CN HIGH: 160, CN LOW: 144, POLE: 79, MSI: 124, NA: 23 | 24776 |
|             | Methylation          | Human Methylation27       | 5   | 117                                                  | CN HIGH: 21, CN LOW: 42, POLE: 15, MSI: 32, NA: 7     | 12778 |
| Methylation | Human Methylation450 | 5                         | 423 | CN HIGH: 140, CN LOW: 102, POLE: 64, MSI: 93, NA: 24 | 20789                                                 |       |
| ACC         | miRNA                | miRNA HiSeq gene          | 3   | 79                                                   | intermediate: 27, high: 20, low: 32                   | 774   |

|      |               |                              |   |     |                                                |       |
|------|---------------|------------------------------|---|-----|------------------------------------------------|-------|
|      | RNASeq        | HiSeqV2<br>PANCAN            | 3 | 78  | intermediate: 27, high: 19, low: 32            | 20530 |
|      |               | HiSeqV2                      | 3 | 78  | intermediate: 27, high: 19, low: 32            | 20530 |
|      |               | HiSeqV2<br>percentile        | 3 | 78  | intermediate: 27, high: 19, low: 32            | 20501 |
|      | Methylation   | Human<br>Methylation450      | 3 | 79  | intermediate: 27, low: 32, high: 20            | 20789 |
|      | SNP/<br>INDEL | ACC mc3 gene<br>level        | 4 | 91  | high: 20, low: 32,<br>intermediate: 27, NA: 12 | 40543 |
|      | CNV           | Gistic2 all data<br>by genes | 4 | 89  | high: 20, low: 32,<br>intermediate: 25, NA: 12 | 24776 |
|      |               | Gistic2 all<br>thresholded   | 4 | 78  | high: 18, low: 28,<br>intermediate: 22, NA: 10 | 24776 |
| LUAD | RPPA          | RPPA                         | 6 | 181 | 2: 28, 5: 42, 1: 19, 6: 32, 4: 22, 3: 38       | 238   |
|      |               | RPPA                         | 6 | 181 | 5: 42, 1: 19, 4: 22, 3: 38, 2: 28, 6: 32       | 131   |
|      | SNP/<br>INDEL | mc3 gene level               | 6 | 226 | 5: 51, 6: 41, 1: 22, 2: 31, 3: 49, 4: 32       | 40543 |
|      | CNV           | Gistic2 all data<br>by genes | 6 | 230 | 5: 52, 6: 41, 1: 22, 2: 32, 3: 51, 4: 32       | 24776 |

|      |               |                         |   |     |                                                        |        |
|------|---------------|-------------------------|---|-----|--------------------------------------------------------|--------|
|      |               | Gistic2 all thresholded | 6 | 230 | 5: 52, 6: 41, 1: 22, 2: 32, 3: 51, 4: 32               | 24776  |
|      | Methylation   | Human Methylation450    | 6 | 188 | 5: 44, 6: 35, 1: 18, 2: 22, 3: 42, 4: 27               | 20789  |
| LIHC | miRNA         | miRNA HiSeq gene        | 4 | 191 | iCluster:2: 55, iCluster:3: 63, iCluster:1: 65, NA: 8  | 747    |
|      | RNASeq        | HiSeqV2                 | 4 | 193 | iCluster:2: 55, iCluster:3: 63, iCluster:1: 65, NA: 10 | 20530  |
|      |               | HiSeqV2 percentile      | 4 | 193 | iCluster:2: 55, iCluster:3: 63, iCluster:1: 65, NA: 10 | 20501  |
|      |               | HiSeqV2 PANCAN          | 4 | 193 | iCluster:2: 55, iCluster:3: 63, iCluster:1: 65, NA: 10 | 20530  |
|      | Exon          | HiSeqV2 exon            | 4 | 193 | iCluster:2: 55, iCluster:3: 63, iCluster:1: 65, NA: 10 | 239322 |
|      | Methylation   | Human Methylation450    | 4 | 196 | iCluster:2: 55, iCluster:3: 63, iCluster:1: 65, NA: 13 | 20789  |
|      | RPPA          | RPPA                    | 4 | 162 | iCluster:1: 56, iCluster:3: 48, iCluster:2: 46, NA: 12 | 219    |
|      | SNP/<br>INDEL | mc3 gene level          | 4 | 182 | iCluster:3: 58, iCluster:1: 60, iCluster:2: 52, NA: 12 | 40543  |
|      | CNV           | Gistic2 all thresholded | 4 | 191 | iCluster:1: 65, iCluster:3: 63, iCluster:2: 55, NA: 8  | 24776  |

|      |                         |                           |     |                                                |                                                             |        |
|------|-------------------------|---------------------------|-----|------------------------------------------------|-------------------------------------------------------------|--------|
|      |                         | Gistic2 all data by genes | 4   | 191                                            | iCluster:1: 65,<br>iCluster:3: 63,<br>iCluster:2: 55, NA: 8 | 24776  |
| THCA | miRNA                   | miRNA HiSeq gene          | 6   | 493                                            | 1: 133, 5: 91, NA: 14,<br>2: 67, 4: 106, 3: 82              | 763    |
|      | RNASeq                  | HiSeqV2 percentile        | 6   | 494                                            | 2: 67, 5: 93, 4: 106, 1:<br>134, 3: 82, NA: 12              | 20501  |
|      |                         | HiSeqV2 PANCAN            | 6   | 494                                            | 2: 67, 5: 93, 4: 106, 1:<br>134, 3: 82, NA: 12              | 20530  |
|      |                         | HiSeqV2                   | 6   | 494                                            | 2: 67, 5: 93, 4: 106, 1:<br>134, 3: 82, NA: 12              | 20530  |
|      | Exon                    | HiSeqV2 exon              | 6   | 494                                            | 2: 67, 5: 93, 4: 106, 1:<br>134, 3: 82, NA: 12              | 239322 |
|      | Methylation             | Human Methylation450      | 6   | 496                                            | 1: 134, 4: 106, 5: 93,<br>3: 82, 2: 67, NA: 14              | 20789  |
|      | RPPA                    | RPPA                      | 6   | 368                                            | 1: 108, 4: 75, 5: 72, 2:<br>45, 3: 57, NA: 11               | 260    |
|      | SNP/<br>INDEL           | mc3 gene level            | 6   | 481                                            | 1: 127, 2: 66, 4: 103,<br>3: 79, 5: 93, NA: 13              | 40543  |
|      | CNV                     | Gistic2 all data by genes | 6   | 492                                            | 1: 132, 2: 67, 3: 82, 4:<br>105, NA: 14, 5: 92              | 24776  |
|      | Gistic2 all thresholded | 6                         | 492 | 1: 132, 2: 67, 3: 82, 4:<br>105, NA: 14, 5: 92 | 24776                                                       |        |

|      |               |                           |   |     |                                                                                                  |       |
|------|---------------|---------------------------|---|-----|--------------------------------------------------------------------------------------------------|-------|
| GBM  | Array         | AgilentG4502A 072         | 6 | 473 | Mesenchymal like: 135, NA: 194, G low: 8, LGm6 GBM: 26, Classic like: 99, G high: 11             | 17814 |
|      |               | HT HG U133A               | 7 | 529 | Classic like: 99, LGm6 GBM: 37, Mesenchymal like: 144, NA: 223, G low: 13, G high: 12, Codel: 1  | 12042 |
|      |               | AgilentG4502A 071         | 7 | 101 | Classic like: 15, NA: 41, LGm6 GBM: 12, G low: 5, Mesenchymal like: 25, G high: 2, Codel: 1      | 17814 |
|      | Methylation   | Human Methylation450      | 5 | 141 | LGm6 GBM: 13, NA: 13, Mesenchymal like: 56, Classic like: 53, G high: 6                          | 20789 |
|      | RPPA          | RPPA                      | 6 | 215 | Mesenchymal like: 71, NA: 50, LGm6 GBM: 14, G low: 5, Classic like: 71, G high: 4                | 131   |
|      | SNP/<br>INDEL | mc3 gene level            | 6 | 314 | Mesenchymal like: 117, LGm6 GBM: 22, G low: 6, Classic like: 99, NA: 62, G high: 8               | 40543 |
|      | CNV           | Gistic2 all thresholded   | 7 | 577 | Mesenchymal like: 164, Classic like: 120, G low: 13, LGm6 GBM: 40, NA: 224, Codel: 1, G high: 15 | 24776 |
|      |               | Gistic2 all data by genes | 7 | 577 | Mesenchymal like: 164, Classic like: 120, G low: 13, LGm6 GBM: 40, NA: 224, Codel: 1, G high: 15 | 24776 |
| ESCA | RPPA          | RPPA                      | 5 | 116 | ESCC: 72, CIN: 40, MSI: 1, GS: 1, HM SNV: 2                                                      | 219   |
|      | SNP/<br>INDEL | mc3 gene level            | 5 | 169 | CIN: 74, HM SNV: 2, ESCC: 90, GS: 1, MSI: 2                                                      | 40543 |

|      |               |                           |   |     |                                             |       |
|------|---------------|---------------------------|---|-----|---------------------------------------------|-------|
|      | CNV           | Gistic2 all thresholded   | 5 | 169 | CIN: 74, HM SNV: 2, ESCC: 90, GS: 1, MSI: 2 | 24776 |
|      |               | Gistic2 all data by genes | 5 | 169 | CIN: 74, HM SNV: 2, ESCC: 90, GS: 1, MSI: 2 | 24776 |
| KIRC | miRNA         | miRNA GA gene             | 5 | 233 | 1: 69, 2: 52, 3: 49, 4: 52, NA: 11          | 581   |
|      | RPPA          | RPPA                      | 5 | 408 | 3: 89, 1: 137, 2: 87, NA: 23, 4: 72         | 131   |
|      |               | RPPA                      | 5 | 408 | 4: 72, 1: 137, 2: 87, 3: 89, NA: 23         | 232   |
|      | SNP/<br>INDEL | mc3 gene level            | 5 | 294 | 3: 59, 1: 109, 2: 50, NA: 21, 4: 55         | 40543 |
|      | CNV           | Gistic2 all thresholded   | 5 | 436 | 1: 145, 3: 92, 2: 90, NA: 23, 4: 86         | 24776 |
|      |               | Gistic2 all data by genes | 5 | 436 | 1: 145, 3: 92, 2: 90, NA: 23, 4: 86         | 24776 |
|      | Methylation   | Human Methylation450      | 5 | 253 | 1: 91, 3: 53, 2: 36, NA: 19, 4: 54          | 20789 |
| KIRP | RPPA          | RPPA                      | 4 | 125 | C1: 71, C2a: 27, C2c CIMP: 9, C2b: 18       | 220   |
|      | SNP/<br>INDEL | mc3 gene level            | 4 | 158 | C2a: 34, C1: 93, C2c CIMP: 9, C2b: 22       | 40543 |

|      |             |                           |   |      |                                                        |        |
|------|-------------|---------------------------|---|------|--------------------------------------------------------|--------|
|      | CNV         | Gistic2 all data by genes | 4 | 161  | C2a: 35, C1: 95, C2c CIMP: 9, C2b: 22                  | 24776  |
|      | CNV         | Gistic2 all thresholded   | 4 | 161  | C2a: 35, C1: 95, C2c CIMP: 9, C2b: 22                  | 24776  |
| BRCA | miRNA       | miRNA HiSeq gene          | 5 | 747  | LumA: 390, Basal: 131, Her2: 58, LumB: 136, Normal: 32 | 707    |
|      |             | miRNA GA gene             | 5 | 319  | LumA: 167, LumB: 70, Basal: 51, Her2: 23, Normal: 8    | 593    |
|      | RNASeq      | HiSeqV2                   | 5 | 1097 | Basal: 192, Her2: 82, LumA: 566, LumB: 217, Normal: 40 | 20530  |
|      |             | HiSeqV2 percentile        | 5 | 1097 | Basal: 192, Her2: 82, LumA: 566, LumB: 217, Normal: 40 | 20501  |
|      |             | HiSeqV2 PANCAN            | 5 | 1097 | Basal: 192, Her2: 82, LumA: 566, LumB: 217, Normal: 40 | 20530  |
|      | Exon        | HiSeqV2 exon              | 5 | 1097 | Basal: 192, Her2: 82, LumA: 566, LumB: 217, Normal: 40 | 239322 |
|      | Array       | AgilentG4502A 073         | 5 | 529  | Her2: 46, LumA: 268, Basal: 96, LumB: 108, Normal: 11  | 17814  |
|      | Methylation | Human Methylation27       | 5 | 314  | LumA: 146, Her2: 36, LumB: 70, Basal: 56, Normal: 6    | 12778  |
|      |             | Human Methylation450      | 5 | 781  | LumA: 418, Her2: 46, LumB: 147, Basal: 136, Normal: 34 | 20789  |

|     |               |                           |   |      |                                                        |       |
|-----|---------------|---------------------------|---|------|--------------------------------------------------------|-------|
|     | RPPA          | RPPA                      | 5 | 742  | LumA: 358, Basal: 130, Her2: 67, LumB: 167, Normal: 20 | 131   |
|     |               | RPPA                      | 5 | 885  | Basal: 157, LumA: 439, LumB: 184, Her2: 75, Normal: 30 | 222   |
|     | SNP/<br>INDEL | mc3 gene level            | 5 | 789  | LumA: 413, Her2: 54, LumB: 145, Normal: 32, Basal: 145 | 40543 |
|     | CNV           | Gistic2 all data by genes | 5 | 1078 | LumA: 556, Her2: 81, LumB: 216, Normal: 39, Basal: 186 | 24776 |
|     |               | Gistic2 all thresholded   | 5 | 1078 | LumA: 556, Her2: 81, LumB: 216, Normal: 39, Basal: 186 | 24776 |
| USC | miRNA         | miRNA GA gene             | 4 | 107  | secretory: 20, classical: 44, primitive: 14, basal: 29 | 660   |
|     | Array         | HT HG U133A               | 4 | 104  | classical: 37, primitive: 16, secretory: 21, basal: 30 | 12042 |
|     |               | AgilentG4502A 073         | 4 | 121  | classical: 45, primitive: 19, secretory: 25, basal: 32 | 17814 |
|     | RPPA          | RPPA                      | 4 | 112  | classical: 38, basal: 28, secretory: 28, primitive: 18 | 131   |
|     |               | RPPA                      | 4 | 112  | classical: 38, primitive: 18, basal: 28, secretory: 28 | 238   |
|     | SNP/<br>INDEL | mc3 gene level            | 4 | 173  | basal: 41, classical: 63, secretory: 42, primitive: 27 | 40543 |

|  |     |                           |   |     |                                                        |       |
|--|-----|---------------------------|---|-----|--------------------------------------------------------|-------|
|  | CNV | Gistic2 all data by genes | 4 | 178 | basal: 43, classical: 65, secretary: 43, primitive: 27 | 24776 |
|  |     | Gistic2 all thresholded   | 4 | 178 | basal: 43, classical: 65, secretary: 43, primitive: 27 | 24776 |

Supplementary Table S2: (Fig. 2.) MACC values of top performing classifiers in terms of 20 different configurations of 8 distinct omics modalities across 20 different cancers.

| Cancer | Modality | Scale                     | Type | Classifier | ACC  | PR   | RE   | F1   | MCC  | AUROC |
|--------|----------|---------------------------|------|------------|------|------|------|------|------|-------|
| ACC    | Meth.    | HumanMethylation450       | ML   | HGB        | 1    | 1    | 1    | 1    | 1    | 1     |
| ACC    | CNV      | Gistic2-all-data-by-genes | DL   | RESNET34   | 0.87 | 0.9  | 0.87 | 0.87 | 0.94 | 0.95  |
| ACC    | CNV      | Gistic2-all-thresholded   | DL   | NN         | 0.69 | 0.71 | 0.69 | 0.7  | 0.85 | 0.75  |
| ACC    | RNASeq   | HiSeqV2                   | ML   | SVM        | 0.83 | 0.9  | 0.83 | 0.84 | 0.93 | 0.95  |
| ACC    | RNASeq   | HiSeqV2-PANCAN            | ML   | SVM        | 0.83 | 0.9  | 0.83 | 0.84 | 0.93 | 0.95  |
| ACC    | RNASeq   | HiSeqV2-percentile        | DL   | RESNET18   | 0.8  | 0.8  | 0.8  | 0.8  | 0.9  | 0.92  |
| ACC    | SNP      | mc3-gene-level            | ML   | CNB        | 0.53 | 0.3  | 0.53 | 0.37 | 0.74 | 0.67  |
| ACC    | miRNA    | miRNA-HiSeq-gene          | ML   | BNB        | 0.8  | 0.85 | 0.8  | 0.82 | 0.9  | 0.9   |
| BLCA   | Meth.    | HumanMethylation450       | ML   | HGB        | 0.79 | 0.79 | 0.79 | 0.79 | 0.93 | 0.93  |
| BLCA   | CNV      | Gistic2-all-data-by-genes | DL   | NN         | 0.66 | 0.71 | 0.66 | 0.67 | 0.87 | 0.81  |
| BLCA   | CNV      | Gistic2-all-thresholded   | ML   | SVM        | 0.57 | 0.55 | 0.57 | 0.55 | 0.85 | 0.76  |
| BLCA   | RNASeq   | HiSeqV2                   | ML   | SVM        | 0.94 | 0.95 | 0.94 | 0.94 | 0.97 | 0.99  |
| BLCA   | RNASeq   | HiSeqV2-PANCAN            | ML   | SVM        | 0.94 | 0.95 | 0.94 | 0.94 | 0.97 | 0.99  |
| BLCA   | Exon     | HiSeqV2-exon              | ML   | HGB        | 0.89 | 0.94 | 0.89 | 0.9  | 0.98 | 0.99  |
| BLCA   | RNASeq   | HiSeqV2-percentile        | ML   | CNB        | 0.93 | 0.95 | 0.93 | 0.93 | 0.97 | 0.98  |
| BLCA   | RPPA     | RPPA                      | DL   | CNN        | 0.77 | 0.78 | 0.77 | 0.77 | 0.93 | 0.88  |
| BLCA   | RPPA     | RPPA-RBN                  | ML   | XGB        | 0.76 | 0.87 | 0.76 | 0.77 | 0.94 | 0.89  |
| BLCA   | SNP      | mc3-gene-level            | DL   | RESNET152  | 0.39 | 0.36 | 0.39 | 0.36 | 0.82 | 0.55  |

|      |        |                           |    |          |       |       |       |       |       |      |
|------|--------|---------------------------|----|----------|-------|-------|-------|-------|-------|------|
| BLCA | miRNA  | miRNA-HiSeq-gene          | DL | RESNET18 | 0.97  | 0.97  | 0.97  | 0.97  | 0.99  | 1    |
| BRCA | Array  | AgilentG4502A-07-3        | ML | BNB      | 0.87  | 0.77  | 0.87  | 0.8   | 0.96  | 0.96 |
| BRCA | Meth.  | HumanMethylation27        | ML | HGB      | 0.76  | 0.86  | 0.76  | 0.79  | 0.92  | 0.93 |
| BRCA | Meth.  | HumanMethylation450       | ML | GNB      | 0.642 | 0.593 | 0.642 | 0.603 | 0.902 | 0.79 |
| BRCA | CNV    | Gistic2-all-data-by-genes | ML | GNB      | 0.65  | 0.58  | 0.65  | 0.57  | 0.9   | 0.79 |
| BRCA | CNV    | Gistic2-all-thresholded   | ML | GNB      | 0.59  | 0.52  | 0.59  | 0.49  | 0.88  | 0.77 |
| BRCA | RNASeq | HiSeqV2                   | DL | CNN      | 0.8   | 0.85  | 0.8   | 0.82  | 0.97  | 0.98 |
| BRCA | RNASeq | HiSeqV2-PANCAN            | DL | CNN LSTM | 0.79  | 0.79  | 0.79  | 0.79  | 0.96  | 0.96 |
| BRCA | Exon   | HiSeqV2-exon              | ML | LR       | 0.81  | 0.84  | 0.81  | 0.82  | 0.96  | 0.99 |
| BRCA | RNASeq | HiSeqV2-percentile        | ML | LR       | 0.83  | 0.83  | 0.83  | 0.83  | 0.97  | 0.99 |
| BRCA | RPPA   | RPPA                      | DL | CNN LSTM | 0.65  | 0.63  | 0.65  | 0.64  | 0.93  | 0.9  |
| BRCA | RPPA   | RPPA-RBN                  | DL | RESNET34 | 0.7   | 0.74  | 0.7   | 0.71  | 0.93  | 0.9  |
| BRCA | SNP    | mc3-gene-level            | ML | RF       | 0.37  | 0.25  | 0.37  | 0.29  | 0.88  | 0.68 |
| BRCA | miRNA  | miRNA-GA-gene             | ML | SVM      | 0.88  | 0.81  | 0.88  | 0.83  | 0.95  | 0.94 |
| BRCA | miRNA  | miRNA-HiSeq-gene          | ML | SVM      | 0.75  | 0.79  | 0.75  | 0.77  | 0.95  | 0.96 |
| COAD | Meth.  | HumanMethylation450       | ML | QDA      | 0.93  | 0.88  | 0.93  | 0.89  | 0.93  | 0.93 |
| COAD | RNASeq | GAV2                      | ML | LR       | 0.86  | 0.82  | 0.86  | 0.84  | 0.96  | 0.87 |
| COAD | Exon   | GAV2-exon                 | ML | SVM      | 1     | 1     | 1     | 1     | 1     | 1    |
| COAD | CNV    | Gistic2-all-data-by-genes | ML | RF       | 0.8   | 0.83  | 0.8   | 0.81  | 0.92  | 0.93 |
| COAD | CNV    | Gistic2-all-thresholded   | ML | CB       | 0.8   | 0.82  | 0.8   | 0.8   | 0.92  | 0.93 |
| COAD | RPPA   | RPPA-RBN                  | ML | SVM      | 0.65  | 0.66  | 0.65  | 0.65  | 0.83  | 0.79 |
| COAD | SNP    | mc3-gene-level            | DL | RESNET50 | 0.73  | 0.71  | 0.73  | 0.72  | 0.86  | 0.79 |
| COAD | miRNA  | miRNA-GA-gene             | DL | DEEPGENE | 0.752 | 0.786 | 0.752 | 0.763 | 0.885 | 0.94 |
| ESCA | CNV    | Gistic2-all-data-by-genes | DL | CNN      | 1     | 1     | 1     | 1     | 1     | 1    |
| ESCA | CNV    | Gistic2-all-thresholded   | DL | DEEPGENE | 1     | 1     | 1     | 1     | 1     | 1    |
| ESCA | RPPA   | RPPA                      | DL | CNN LSTM | 1     | 1     | 1     | 1     | 1     | 1    |

|      |       |                           |    |           |       |       |       |       |       |      |
|------|-------|---------------------------|----|-----------|-------|-------|-------|-------|-------|------|
| ESCA | SNP   | mc3-gene-level            | DL | MLP       | 0.85  | 0.85  | 0.85  | 0.85  | 0.85  | 0.85 |
| GBM  | Array | AgilentG4502A-07-1        | DL | NN        | 0.73  | 0.77  | 0.73  | 0.74  | 0.93  | 0.94 |
| GBM  | Array | AgilentG4502A-07-2        | ML | XGB       | 0.75  | 0.8   | 0.75  | 0.76  | 0.94  | 0.91 |
| GBM  | Meth. | HumanMethylation450       | ML | DT        | 0.57  | 0.59  | 0.57  | 0.57  | 0.89  | 0.73 |
| GBM  | CNV   | Gistic2-all-data-by-genes | ML | BNB       | 0.5   | 0.34  | 0.5   | 0.35  | 0.86  | 0.73 |
| GBM  | CNV   | Gistic2-all-thresholded   | ML | SVM       | 0.4   | 0.42  | 0.4   | 0.4   | 0.85  | 0.7  |
| GBM  | Array | HT-HG-U133A               | ML | HGB       | 0.449 | 0.478 | 0.449 | 0.457 | 0.922 | 0.9  |
| GBM  | RPPA  | RPPA-RBN                  | DL | MLP       | 0.49  | 0.65  | 0.49  | 0.53  | 0.82  | 0.73 |
| GBM  | SNP   | mc3-gene-level            | DL | RESNET18  | 0.37  | 0.41  | 0.37  | 0.34  | 0.81  | 0.71 |
| HNSC | Meth. | HumanMethylation450       | ML | CNB       | 0.63  | 0.67  | 0.63  | 0.62  | 0.87  | 0.81 |
| HNSC | CNV   | Gistic2-all-data-by-genes | ML | RF        | 0.64  | 0.65  | 0.64  | 0.64  | 0.89  | 0.82 |
| HNSC | CNV   | Gistic2-all-thresholded   | ML | RF        | 0.51  | 0.52  | 0.51  | 0.51  | 0.84  | 0.69 |
| HNSC | RPPA  | RPPA                      | ML | GNB       | 0.71  | 0.71  | 0.71  | 0.7   | 0.9   | 0.85 |
| HNSC | RPPA  | RPPA-RBN                  | ML | HGB       | 0.53  | 0.55  | 0.53  | 0.53  | 0.84  | 0.76 |
| HNSC | SNP   | mc3-gene-level            | ML | RF        | 0.38  | 0.3   | 0.38  | 0.31  | 0.79  | 0.64 |
| KIRC | Meth. | HumanMethylation450       | DL | RESNET101 | 0.34  | 0.25  | 0.34  | 0.27  | 0.83  | 0.66 |
| KIRC | CNV   | Gistic2-all-data-by-genes | DL | MLP       | 0.34  | 0.34  | 0.34  | 0.34  | 0.84  | 0.6  |
| KIRC | CNV   | Gistic2-all-thresholded   | ML | HGB       | 0.34  | 0.32  | 0.34  | 0.33  | 0.85  | 0.57 |
| KIRC | RPPA  | RPPA                      | DL | DEEPGENE  | 0.467 | 0.465 | 0.467 | 0.459 | 0.876 | 0.7  |
| KIRC | RPPA  | RPPA-RBN                  | DL | CNN LSTM  | 0.41  | 0.38  | 0.41  | 0.38  | 0.87  | 0.68 |
| KIRC | SNP   | mc3-gene-level            | DL | RESNET50  | 0.27  | 0.16  | 0.27  | 0.2   | 0.83  | 0.55 |
| KIRC | miRNA | miRNA-GA-gene             | DL | CNN       | 0.539 | 0.55  | 0.539 | 0.536 | 0.909 | 0.81 |
| KIRP | CNV   | Gistic2-all-data-by-genes | DL | DEEPGENE  | 0.887 | 0.871 | 0.887 | 0.875 | 0.946 | 0.89 |
| KIRP | CNV   | Gistic2-all-thresholded   | DL | CNN RNN   | 0.74  | 0.72  | 0.74  | 0.73  | 0.9   | 0.94 |
| KIRP | RPPA  | RPPA                      | DL | MLP       | 0.77  | 0.89  | 0.77  | 0.8   | 0.91  | 0.93 |
| KIRP | SNP   | mc3-gene-level            | ML | DT        | 0.61  | 0.67  | 0.61  | 0.62  | 0.81  | 0.71 |

|      |        |                           |    |           |       |       |       |       |       |       |
|------|--------|---------------------------|----|-----------|-------|-------|-------|-------|-------|-------|
| LAML | miRNA  | GA                        | ML | SVM       | 0.77  | 0.829 | 0.77  | 0.759 | 0.957 | 0.96  |
| LAML | Exon   | GA-exon                   | ML | LR        | 0.73  | 0.78  | 0.73  | 0.73  | 0.96  | 0.96  |
| LAML | CNV    | Gistic2-all-data-by-genes | DL | RESNET50  | 0.32  | 0.28  | 0.32  | 0.21  | 0.89  | 0.67  |
| LAML | CNV    | Gistic2-all-thresholded   | ML | GNB       | 0.25  | 0.2   | 0.25  | 0.21  | 0.87  | 0.56  |
| LAML | RNASeq | HiSeqV2                   | ML | RF        | 0.69  | 0.69  | 0.69  | 0.67  | 0.96  | 0.94  |
| LAML | RNASeq | HiSeqV2-PANCAN            | ML | RF        | 0.69  | 0.69  | 0.69  | 0.67  | 0.96  | 0.94  |
| LAML | Exon   | HiSeqV2-exon              | ML | HGB       | 0.71  | 0.7   | 0.71  | 0.69  | 0.96  | 0.96  |
| LAML | RNASeq | HiSeqV2-percentile        | ML | HGB       | 0.7   | 0.66  | 0.7   | 0.68  | 0.96  | 0.94  |
| LAML | miRNA  | miRNA-GA-gene             | ML | HGB       | 0.63  | 0.64  | 0.63  | 0.62  | 0.94  | 0.9   |
| LAML | SNP    | mutation-wustl-gene       | DL | CNN       | 0.267 | 0.41  | 0.267 | 0.273 | 0.879 | 0.558 |
| LGG  | CNV    | Gistic2-all-data-by-genes | DL | NN        | 0.65  | 0.65  | 0.65  | 0.65  | 0.97  | 0.89  |
| LGG  | CNV    | Gistic2-all-thresholded   | DL | MLP       | 0.66  | 0.58  | 0.66  | 0.61  | 0.97  | 0.91  |
| LGG  | SNP    | mc3-gene-level            | DL | DEEPGENE  | 0.633 | 0.669 | 0.633 | 0.645 | 0.964 | 0.95  |
| LIHC | Meth.  | HumanMethylation450       | DL | LSTM      | 0.69  | 0.64  | 0.69  | 0.66  | 0.95  | 0.82  |
| LIHC | CNV    | Gistic2-all-data-by-genes | ML | LR        | 0.67  | 0.67  | 0.67  | 0.67  | 0.84  | 0.77  |
| LIHC | CNV    | Gistic2-all-thresholded   | DL | LSTM      | 0.65  | 0.64  | 0.65  | 0.64  | 0.82  | 0.77  |
| LIHC | RNASeq | HiSeqV2                   | ML | CB        | 0.69  | 0.66  | 0.69  | 0.67  | 0.95  | 0.81  |
| LIHC | RNASeq | HiSeqV2-PANCAN            | DL | NN        | 0.73  | 0.74  | 0.73  | 0.73  | 0.93  | 0.89  |
| LIHC | Exon   | HiSeqV2-exon              | ML | CB        | 0.63  | 0.6   | 0.63  | 0.61  | 0.93  | 0.84  |
| LIHC | RNASeq | HiSeqV2-percentile        | ML | CB        | 0.69  | 0.65  | 0.69  | 0.67  | 0.95  | 0.85  |
| LIHC | RPPA   | RPPA                      | DL | RNN       | 0.45  | 0.45  | 0.45  | 0.42  | 0.84  | 0.78  |
| LIHC | SNP    | mc3-gene-level            | ML | DT        | 0.46  | 0.464 | 0.46  | 0.382 | 0.809 | 0.635 |
| LIHC | miRNA  | miRNA-HiSeq-gene          | ML | SVM       | 0.86  | 0.86  | 0.86  | 0.86  | 0.93  | 0.92  |
| LUAD | Meth.  | HumanMethylation27        | DL | RESNET101 | 1     | 1     | 1     | 1     | 1     | 1     |
| LUAD | Meth.  | HumanMethylation450       | ML | RF        | 0.79  | 0.83  | 0.79  | 0.8   | 0.96  | 0.94  |
| LUAD | CNV    | Gistic2-all-data-by-genes | DL | NN        | 0.69  | 0.7   | 0.69  | 0.66  | 0.94  | 0.91  |

|      |        |                           |    |           |       |       |       |       |       |       |
|------|--------|---------------------------|----|-----------|-------|-------|-------|-------|-------|-------|
| LUAD | CNV    | Gistic2-all-thresholded   | ML | GNB       | 0.62  | 0.68  | 0.62  | 0.61  | 0.92  | 0.78  |
| LUAD | RPPA   | RPPA                      | ML | SVM       | 0.63  | 0.74  | 0.63  | 0.64  | 0.93  | 0.9   |
| LUAD | RPPA   | RPPA-RBN                  | DL | RESNET18  | 0.52  | 0.58  | 0.52  | 0.54  | 0.9   | 0.76  |
| LUAD | SNP    | mc3-gene-level            | ML | LR        | 0.35  | 0.45  | 0.35  | 0.34  | 0.88  | 0.72  |
| LUSC | Array  | AgilentG4502A-07-3        | ML | HGB       | 0.85  | 0.9   | 0.85  | 0.84  | 0.96  | 0.99  |
| LUSC | CNV    | Gistic2-all-data-by-genes | ML | GNB       | 0.59  | 0.59  | 0.59  | 0.58  | 0.87  | 0.75  |
| LUSC | CNV    | Gistic2-all-thresholded   | ML | XGB       | 0.6   | 0.63  | 0.6   | 0.61  | 0.86  | 0.77  |
| LUSC | Array  | HT-HG-U133A               | DL | RESNET34  | 0.92  | 0.97  | 0.92  | 0.93  | 0.98  | 0.92  |
| LUSC | RPPA   | RPPA                      | DL | RNN       | 0.594 | 0.51  | 0.594 | 0.544 | 0.895 | 0.865 |
| LUSC | RPPA   | RPPA-RBN                  | ML | AB        | 0.36  | 0.43  | 0.36  | 0.35  | 0.78  | 0.6   |
| LUSC | SNP    | mc3-gene-level            | ML | HGB       | 0.4   | 0.4   | 0.4   | 0.39  | 0.79  | 0.59  |
| LUSC | miRNA  | miRNA-GA-gene             | ML | SVM       | 0.67  | 0.57  | 0.67  | 0.61  | 0.92  | 0.9   |
| PCPG | CNV    | Gistic2-all-data-by-genes | ML | RF        | 0.56  | 0.49  | 0.56  | 0.52  | 0.9   | 0.84  |
| PCPG | CNV    | Gistic2-all-thresholded   | ML | XGB       | 0.64  | 0.68  | 0.64  | 0.64  | 0.88  | 0.89  |
| PCPG | RNASeq | HiSeqV2                   | DL | RESNET18  | 0.94  | 0.96  | 0.94  | 0.94  | 0.99  | 1     |
| PCPG | RNASeq | HiSeqV2-PANCAN            | DL | DEEPPGENE | 0.95  | 0.981 | 0.95  | 0.962 | 0.989 | 1     |
| PCPG | Exon   | HiSeqV2-exon              | ML | SVM       | 0.94  | 0.96  | 0.94  | 0.94  | 0.99  | 0.98  |
| PCPG | RNASeq | HiSeqV2-percentile        | DL | MLP       | 1     | 1     | 1     | 1     | 1     | 1     |
| PCPG | RPPA   | RPPA                      | ML | SVM       | 0.95  | 0.94  | 0.95  | 0.94  | 0.96  | 0.93  |
| PCPG | SNP    | mc3-gene-level            | DL | CNN GRU   | 0.5   | 0.52  | 0.5   | 0.5   | 0.87  | 0.7   |
| PCPG | miRNA  | miRNA-HiSeq-gene          | ML | HGB       | 0.98  | 0.96  | 0.98  | 0.97  | 0.99  | 1     |
| PRAD | CNV    | Gistic2-all-data-by-genes | DL | MLP       | 0.5   | 0.45  | 0.5   | 0.47  | 0.88  | 0.71  |
| PRAD | CNV    | Gistic2-all-thresholded   | DL | CNN LSTM  | 0.45  | 0.38  | 0.45  | 0.39  | 0.87  | 0.68  |
| PRAD | RNASeq | HiSeqV2                   | ML | HGB       | 0.99  | 0.99  | 0.99  | 0.99  | 1     | 1     |
| PRAD | RNASeq | HiSeqV2-PANCAN            | ML | HGB       | 0.99  | 0.99  | 0.99  | 0.99  | 1     | 1     |
| PRAD | Exon   | HiSeqV2-exon              | ML | XGB       | 0.93  | 0.91  | 0.93  | 0.92  | 0.98  | 0.98  |

|      |        |                           |    |           |       |       |       |       |       |       |
|------|--------|---------------------------|----|-----------|-------|-------|-------|-------|-------|-------|
| PRAD | RNASeq | HiSeqV2-percentile        | ML | HGB       | 0.93  | 0.98  | 0.93  | 0.95  | 0.99  | 0.99  |
| PRAD | RPPA   | RPPA                      | ML | SVM       | 0.44  | 0.37  | 0.44  | 0.39  | 0.9   | 0.7   |
| PRAD | SNP    | mc3-gene-level            | ML | SVM       | 0.42  | 0.4   | 0.42  | 0.4   | 0.85  | 0.63  |
| PRAD | miRNA  | miRNA-HiSeq-gene          | DL | MLP       | 0.48  | 0.51  | 0.48  | 0.46  | 0.89  | 0.77  |
| SKCM | Meth.  | HumanMethylation450       | DL | RESNET34  | 0.39  | 0.43  | 0.39  | 0.37  | 0.86  | 0.62  |
| SKCM | CNV    | Gistic2-all-thresholded   | DL | RNN       | 0.46  | 0.41  | 0.46  | 0.43  | 0.85  | 0.73  |
| STAD | Meth.  | HumanMethylation450       | DL | DEEPPGENE | 0.838 | 0.819 | 0.838 | 0.827 | 0.933 | 0.93  |
| STAD | CNV    | Gistic2-all-data-by-genes | DL | CNN_GRU   | 0.76  | 0.77  | 0.76  | 0.76  | 0.94  | 0.94  |
| STAD | CNV    | Gistic2-all-thresholded   | DL | CNN_GRU   | 0.68  | 0.73  | 0.68  | 0.7   | 0.91  | 0.89  |
| STAD | RPPA   | RPPA                      | DL | RNN       | 0.717 | 0.763 | 0.717 | 0.734 | 0.905 | 0.879 |
| STAD | SNP    | mc3-gene-level            | ML | HGB       | 0.77  | 0.76  | 0.77  | 0.76  | 0.93  | 0.92  |
| THCA | Meth.  | HumanMethylation450       | ML | SVM       | 0.67  | 0.65  | 0.67  | 0.65  | 0.96  | 0.81  |
| THCA | CNV    | Gistic2-all-data-by-genes | DL | MLP       | 0.3   | 0.32  | 0.3   | 0.3   | 0.87  | 0.6   |
| THCA | CNV    | Gistic2-all-thresholded   | DL | LSTM      | 0.27  | 0.23  | 0.27  | 0.22  | 0.87  | 0.67  |
| THCA | RNASeq | HiSeqV2                   | ML | LR        | 0.77  | 0.75  | 0.77  | 0.76  | 0.98  | 0.94  |
| THCA | RNASeq | HiSeqV2-PANCAN            | DL | CNN       | 0.77  | 0.74  | 0.77  | 0.75  | 0.98  | 0.95  |
| THCA | Exon   | HiSeqV2-exon              | ML | HGB       | 0.83  | 0.91  | 0.83  | 0.85  | 0.98  | 0.99  |
| THCA | RNASeq | HiSeqV2-percentile        | DL | RESNET18  | 0.76  | 0.76  | 0.76  | 0.76  | 0.98  | 0.92  |
| THCA | RPPA   | RPPA                      | DL | MLP       | 0.54  | 0.53  | 0.54  | 0.53  | 0.93  | 0.82  |
| THCA | SNP    | mc3-gene-level            | ML | HGB       | 0.32  | 0.16  | 0.32  | 0.21  | 0.88  | 0.67  |
| THCA | miRNA  | miRNA-HiSeq-gene          | DL | RESNET18  | 0.687 | 0.689 | 0.687 | 0.68  | 0.965 | 0.934 |
| UCEC | Meth.  | HumanMethylation27        | DL | LSTM      | 0.881 | 0.937 | 0.881 | 0.9   | 0.965 | 0.956 |
| UCEC | Meth.  | HumanMethylation450       | ML | HGB       | 0.636 | 0.613 | 0.636 | 0.621 | 0.943 | 0.84  |
| UCEC | CNV    | Gistic2-all-data-by-genes | DL | RNN       | 0.48  | 0.49  | 0.48  | 0.47  | 0.89  | 0.77  |
| UCEC | CNV    | Gistic2-all-thresholded   | DL | CNN_LSTM  | 0.45  | 0.49  | 0.45  | 0.41  | 0.89  | 0.78  |
| UCEC | RPPA   | RPPA                      | DL | CNN_GRU   | 0.573 | 0.555 | 0.573 | 0.56  | 0.918 | 0.813 |

|      |       |                |    |     |      |      |      |      |      |      |
|------|-------|----------------|----|-----|------|------|------|------|------|------|
| UCEC | RPPA  | RPPA-RBN       | DL | GRU | 0.59 | 0.58 | 0.59 | 0.58 | 0.92 | 0.8  |
| UCEC | SNP   | mc3-gene-level | ML | XGB | 0.7  | 0.71 | 0.7  | 0.71 | 0.96 | 0.89 |
| UCEC | miRNA | miRNA-GA-gene  | ML | HGB | 0.67 | 0.83 | 0.67 | 0.71 | 0.9  | 0.81 |

Supplementary Table S3: MACC of top performing classifier-modality combination across 20 different cancers in terms of 8 distinct omics modalities. (b) PR-RC difference of top performing classifier-modality combination for a cancer. A larger PR-RC difference indicates a higher degree of bias in the molecular subtype classification results for the corresponding cancer.

| Cancer | Modality | Scale                     | Type | Classifier | MACC  | PR    | RE    | F1    | MCC   | AUROC | PR-RC |
|--------|----------|---------------------------|------|------------|-------|-------|-------|-------|-------|-------|-------|
| ACC    | SNP      | mc3-gene-level            | ML   | CNB        | 0.53  | 0.3   | 0.53  | 0.37  | 0.74  | 0.67  |       |
| BLCA   | CNV      | Gistic2-all-thresholded   | DL   | NN         | 0.48  | 0.54  | 0.48  | 0.49  | 0.82  | 0.72  |       |
| BRCA   | Meth.    | HumanMethylation450       | ML   | HGB        | 0.626 | 0.85  | 0.626 | 0.66  | 0.933 | 0.88  |       |
| COAD   | Meth.    | HumanMethylation450       | ML   | QDA        | 0.93  | 0.88  | 0.93  | 0.89  | 0.93  | 0.93  |       |
| ESCA   | CNV      | Gistic2-all-data-by-genes | DL   | CNN        | 1     | 1     | 1     | 1     | 1     | 1     |       |
| GBM    | Array    | AgilentG4502A-07-1        | ML   | XGB        | 0.7   | 0.87  | 0.7   | 0.73  | 0.92  | 0.91  |       |
| HNSC   | SNP      | mc3-gene-level            | ML   | RF         | 0.38  | 0.3   | 0.38  | 0.31  | 0.79  | 0.64  |       |
| KIRC   | SNP      | mc3-gene-level            | DL   | RESNET50   | 0.27  | 0.16  | 0.27  | 0.2   | 0.83  | 0.55  |       |
| KIRP   | RPPA     | RPPA                      | DL   | MLP        | 0.77  | 0.89  | 0.77  | 0.8   | 0.91  | 0.93  |       |
| LAML   | SNP      | mutation-wustl-gene       | DL   | CNN        | 0.267 | 0.41  | 0.267 | 0.273 | 0.879 | 0.558 |       |
| LGG    | SNP      | mc3-gene-level            | DL   | DEEPPGENE  | 0.633 | 0.669 | 0.633 | 0.645 | 0.964 | 0.95  |       |
| LIHC   | Meth.    | HumanMethylation450       | DL   | LSTM       | 0.69  | 0.64  | 0.69  | 0.66  | 0.95  | 0.82  |       |
| LUAD   | RPPA     | RPPA                      | ML   | SVM        | 0.63  | 0.74  | 0.63  | 0.64  | 0.93  | 0.9   |       |
| LUSC   | miRNA    | miRNA-GA-gene             | ML   | SVM        | 0.67  | 0.57  | 0.67  | 0.61  | 0.92  | 0.9   |       |
| PCPG   | RNASeq   | HiSeqV2                   | DL   | MLP        | 0.61  | 0.88  | 0.61  | 0.63  | 0.87  | 0.99  |       |
| PRAD   | RPPA     | RPPA                      | ML   | SVM        | 0.44  | 0.37  | 0.44  | 0.39  | 0.9   | 0.7   |       |
| SKCM   | CNV      | Gistic2-all-thresholded   | DL   | RNN        | 0.46  | 0.41  | 0.46  | 0.43  | 0.85  | 0.73  |       |
| STAD   | CNV      | Gistic2-all-thresholded   | DL   | CNN GRU    | 0.68  | 0.73  | 0.68  | 0.7   | 0.91  | 0.89  |       |
| THCA   | SNP      | mc3-gene-level            | ML   | HGB        | 0.32  | 0.16  | 0.32  | 0.21  | 0.88  | 0.67  |       |
| UCEC   | miRNA    | miRNA-GA-gene             | ML   | HGB        | 0.67  | 0.83  | 0.67  | 0.71  | 0.9   | 0.81  |       |

Supplementary Table S4: Modality-wise average MACC values for (a) ML

| Modality | Classifier | MACC     | PR       | RE       | F1       | MCC      | AUROC    |
|----------|------------|----------|----------|----------|----------|----------|----------|
| Array    | AB         | 0.457667 | 0.451667 | 0.457667 | 0.433667 | 0.8765   | 0.861667 |
| CNV      | AB         | 0.403846 | 0.396667 | 0.403846 | 0.361282 | 0.839487 | 0.738462 |
| Exon     | AB         | 0.665556 | 0.736667 | 0.665556 | 0.674444 | 0.926667 | 0.92     |
| Meth.    | AB         | 0.484188 | 0.458875 | 0.484188 | 0.447688 | 0.813063 | 0.759    |
| RNASeq   | AB         | 0.6224   | 0.65012  | 0.6224   | 0.6154   | 0.90512  | 0.86712  |
| RPPA     | AB         | 0.406522 | 0.387826 | 0.406522 | 0.375217 | 0.825217 | 0.71913  |
| SNP      | AB         | 0.379105 | 0.365263 | 0.379105 | 0.334842 | 0.808211 | 0.663211 |
| miRNA    | AB         | 0.472571 | 0.493143 | 0.472571 | 0.456214 | 0.857    | 0.811429 |
| Array    | BNB        | 0.536167 | 0.515167 | 0.536167 | 0.494833 | 0.877167 | 0.751667 |
| CNV      | BNB        | 0.434872 | 0.419487 | 0.434872 | 0.405385 | 0.839231 | 0.665641 |
| Exon     | BNB        | 0.468889 | 0.468889 | 0.468889 | 0.444444 | 0.872222 | 0.703333 |
| Meth.    | BNB        | 0.263125 | 0.124687 | 0.263125 | 0.163438 | 0.73625  | 0.518125 |
| RNASeq   | BNB        | 0.5328   | 0.5036   | 0.5328   | 0.5024   | 0.8884   | 0.842    |
| RPPA     | BNB        | 0.473913 | 0.468261 | 0.473913 | 0.453478 | 0.845652 | 0.764783 |
| SNP      | BNB        | 0.286368 | 0.177947 | 0.286368 | 0.198053 | 0.771053 | 0.561684 |
| miRNA    | BNB        | 0.488714 | 0.528143 | 0.488714 | 0.475071 | 0.8615   | 0.816429 |
| Array    | CB         | 0.489    | 0.454667 | 0.489    | 0.453833 | 0.9      | 0.901667 |
| CNV      | CB         | 0.435897 | 0.428974 | 0.435897 | 0.401795 | 0.851795 | 0.768974 |
| Exon     | CB         | 0.547778 | 0.555556 | 0.547778 | 0.52     | 0.905556 | 0.936667 |
| Meth.    | CB         | 0.5395   | 0.556625 | 0.5395   | 0.5165   | 0.853625 | 0.826    |
| RNASeq   | CB         | 0.606    | 0.6192   | 0.606    | 0.584    | 0.922    | 0.9332   |
| RPPA     | CB         | 0.433913 | 0.446522 | 0.433913 | 0.396087 | 0.837826 | 0.786522 |
| SNP      | CB         | 0.324737 | 0.235316 | 0.324737 | 0.244842 | 0.788421 | 0.655474 |
| miRNA    | CB         | 0.448214 | 0.451714 | 0.448214 | 0.409643 | 0.845786 | 0.875714 |
| Array    | CNB        | 0.592    | 0.6155   | 0.592    | 0.598    | 0.9335   | 0.835    |
| Exon     | CNB        | 0.597778 | 0.661111 | 0.597778 | 0.592222 | 0.915556 | 0.817778 |
| Meth.    | CNB        | 0.496813 | 0.4725   | 0.496813 | 0.458563 | 0.818188 | 0.759375 |
| RNASeq   | CNB        | 0.647529 | 0.676588 | 0.647529 | 0.633471 | 0.928353 | 0.881765 |
| SNP      | CNB        | 0.309684 | 0.290895 | 0.309684 | 0.250263 | 0.780632 | 0.624316 |
| miRNA    | CNB        | 0.551786 | 0.584929 | 0.551786 | 0.525929 | 0.877571 | 0.835    |
| Array    | DT         | 0.517333 | 0.536833 | 0.517333 | 0.513    | 0.891    | 0.701667 |
| CNV      | DT         | 0.418462 | 0.425128 | 0.418462 | 0.412308 | 0.838462 | 0.631538 |
| Exon     | DT         | 0.638889 | 0.641111 | 0.638889 | 0.634444 | 0.915556 | 0.774444 |
| Meth.    | DT         | 0.52725  | 0.546813 | 0.52725  | 0.523688 | 0.842688 | 0.685    |
| RNASeq   | DT         | 0.6572   | 0.6556   | 0.6572   | 0.644    | 0.9036   | 0.7812   |
| RPPA     | DT         | 0.400435 | 0.413478 | 0.400435 | 0.4      | 0.825217 | 0.613043 |
| SNP      | DT         | 0.412632 | 0.409684 | 0.412632 | 0.381684 | 0.821526 | 0.615526 |
| miRNA    | DT         | 0.476929 | 0.484857 | 0.476929 | 0.473786 | 0.841786 | 0.659286 |
| Array    | GB         | 0.2545   | 0.170167 | 0.2545   | 0.1765   | 0.797167 | 0.825    |
| CNV      | GB         | 0.299231 | 0.226667 | 0.299231 | 0.230513 | 0.783846 | 0.699487 |
| Exon     | GB         | 0.395556 | 0.365556 | 0.395556 | 0.352222 | 0.846667 | 0.904444 |
| Meth.    | GB         | 0.358063 | 0.299937 | 0.358063 | 0.30125  | 0.783688 | 0.759375 |

|        |      |          |          |          |          |          |          |
|--------|------|----------|----------|----------|----------|----------|----------|
| RNASeq | GB   | 0.3664   | 0.324    | 0.3664   | 0.3208   | 0.8212   | 0.8584   |
| RPPA   | GB   | 0.294348 | 0.211739 | 0.294348 | 0.221739 | 0.773913 | 0.676957 |
| SNP    | GB   | 0.278158 | 0.215053 | 0.278158 | 0.200211 | 0.767895 | 0.658842 |
| miRNA  | GB   | 0.313786 | 0.250643 | 0.313786 | 0.254643 | 0.795786 | 0.727143 |
| Array  | GNB  | 0.638333 | 0.688667 | 0.638333 | 0.639333 | 0.917833 | 0.801667 |
| CNV    | GNB  | 0.462821 | 0.476667 | 0.462821 | 0.441026 | 0.851282 | 0.669231 |
| Exon   | GNB  | 0.4      | 0.443333 | 0.4      | 0.37     | 0.852222 | 0.626667 |
| Meth.  | GNB  | 0.553375 | 0.549187 | 0.553375 | 0.534938 | 0.846    | 0.71125  |
| RNASeq | GNB  | 0.3628   | 0.364    | 0.3628   | 0.3232   | 0.8308   | 0.598    |
| RPPA   | GNB  | 0.477826 | 0.478261 | 0.477826 | 0.458261 | 0.849565 | 0.742609 |
| SNP    | GNB  | 0.271263 | 0.223421 | 0.271263 | 0.205211 | 0.769    | 0.522737 |
| miRNA  | GNB  | 0.297857 | 0.300286 | 0.297857 | 0.277143 | 0.785857 | 0.54     |
| Array  | HGB  | 0.6765   | 0.744667 | 0.6765   | 0.687833 | 0.937    | 0.943333 |
| CNV    | HGB  | 0.476667 | 0.488974 | 0.476667 | 0.467949 | 0.858974 | 0.769487 |
| Exon   | HGB  | 0.777778 | 0.823333 | 0.777778 | 0.78     | 0.958889 | 0.963333 |
| Meth.  | HGB  | 0.624938 | 0.6215   | 0.624938 | 0.606063 | 0.866813 | 0.821875 |
| RNASeq | HGB  | 0.7508   | 0.778    | 0.7508   | 0.7524   | 0.9428   | 0.9496   |
| RPPA   | HGB  | 0.49087  | 0.516087 | 0.49087  | 0.487391 | 0.861304 | 0.785217 |
| SNP    | HGB  | 0.382842 | 0.336789 | 0.382842 | 0.343263 | 0.802158 | 0.635368 |
| miRNA  | HGB  | 0.637286 | 0.658214 | 0.637286 | 0.634571 | 0.897929 | 0.862857 |
| Array  | KNN  | 0.497833 | 0.5645   | 0.497833 | 0.492333 | 0.884667 | 0.853333 |
| CNV    | KNN  | 0.404359 | 0.423333 | 0.404359 | 0.365385 | 0.829744 | 0.700769 |
| Exon   | KNN  | 0.564444 | 0.621111 | 0.564444 | 0.557778 | 0.896667 | 0.888889 |
| Meth.  | KNN  | 0.506688 | 0.570313 | 0.506688 | 0.48425  | 0.837875 | 0.758125 |
| RNASeq | KNN  | 0.6364   | 0.7124   | 0.6364   | 0.6396   | 0.9156   | 0.9128   |
| RPPA   | KNN  | 0.468261 | 0.527826 | 0.468261 | 0.461739 | 0.848696 | 0.748261 |
| SNP    | KNN  | 0.254211 | 0.140579 | 0.254211 | 0.124842 | 0.754737 | 0.524526 |
| miRNA  | KNN  | 0.533857 | 0.602143 | 0.533857 | 0.525143 | 0.867286 | 0.836429 |
| Array  | LGBM | 0.242833 | 0.145167 | 0.242833 | 0.163167 | 0.792167 | 0.86     |
| CNV    | LGBM | 0.287949 | 0.219487 | 0.287949 | 0.214359 | 0.774103 | 0.715641 |
| Exon   | LGBM | 0.382222 | 0.336667 | 0.382222 | 0.326667 | 0.847778 | 0.93     |
| Meth.  | LGBM | 0.34125  | 0.265625 | 0.34125  | 0.266938 | 0.773625 | 0.780625 |
| RNASeq | LGBM | 0.3604   | 0.3068   | 0.3604   | 0.3092   | 0.826    | 0.8896   |
| RPPA   | LGBM | 0.288261 | 0.204348 | 0.288261 | 0.21     | 0.77087  | 0.702609 |
| SNP    | LGBM | 0.264368 | 0.15     | 0.264368 | 0.179632 | 0.761579 | 0.637105 |
| miRNA  | LGBM | 0.301857 | 0.224286 | 0.301857 | 0.229786 | 0.791929 | 0.776429 |
| Array  | LR   | 0.672667 | 0.699833 | 0.672667 | 0.670667 | 0.930833 | 0.938333 |
| CNV    | LR   | 0.486667 | 0.488718 | 0.486667 | 0.475385 | 0.858974 | 0.747949 |
| Exon   | LR   | 0.747778 | 0.767778 | 0.747778 | 0.748889 | 0.95     | 0.965556 |
| Meth.  | LR   | 0.652313 | 0.702125 | 0.652313 | 0.659875 | 0.881063 | 0.83875  |
| RNASeq | LR   | 0.7728   | 0.7928   | 0.7728   | 0.772    | 0.952    | 0.9524   |
| RPPA   | LR   | 0.522174 | 0.53913  | 0.522174 | 0.522609 | 0.871304 | 0.797826 |
| SNP    | LR   | 0.391789 | 0.370368 | 0.391789 | 0.346947 | 0.816895 | 0.691368 |

|        |     |          |          |          |          |          |          |
|--------|-----|----------|----------|----------|----------|----------|----------|
| miRNA  | LR  | 0.688571 | 0.712857 | 0.688571 | 0.685429 | 0.9155   | 0.895714 |
| Array  | QDA | 0.261    | 0.2585   | 0.261    | 0.251    | 0.806167 | 0.533333 |
| CNV    | QDA | 0.286154 | 0.281282 | 0.286154 | 0.238205 | 0.769231 | 0.527179 |
| Exon   | QDA | 0.243333 | 0.235556 | 0.243333 | 0.232222 | 0.793333 | 0.517778 |
| Meth.  | QDA | 0.28525  | 0.275375 | 0.28525  | 0.274875 | 0.7525   | 0.51875  |
| RNASeq | QDA | 0.2568   | 0.2532   | 0.2568   | 0.2472   | 0.7756   | 0.5156   |
| RPPA   | QDA | 0.268696 | 0.253478 | 0.268696 | 0.246087 | 0.762609 | 0.517826 |
| SNP    | QDA | 0.258421 | 0.203158 | 0.258421 | 0.186789 | 0.761105 | 0.507895 |
| miRNA  | QDA | 0.228786 | 0.239929 | 0.228786 | 0.223786 | 0.767429 | 0.499286 |
| Array  | RF  | 0.595    | 0.654333 | 0.595    | 0.603    | 0.923667 | 0.908333 |
| CNV    | RF  | 0.487949 | 0.516667 | 0.487949 | 0.480769 | 0.86359  | 0.770513 |
| Exon   | RF  | 0.673333 | 0.725556 | 0.673333 | 0.676667 | 0.934444 | 0.944444 |
| Meth.  | RF  | 0.602063 | 0.632    | 0.602063 | 0.59325  | 0.87075  | 0.81375  |
| RNASeq | RF  | 0.6772   | 0.7312   | 0.6772   | 0.6776   | 0.9332   | 0.9412   |
| RPPA   | RF  | 0.483478 | 0.508696 | 0.483478 | 0.471739 | 0.854783 | 0.775652 |
| SNP    | RF  | 0.392105 | 0.366105 | 0.392105 | 0.338842 | 0.812632 | 0.670316 |
| miRNA  | RF  | 0.560643 | 0.610857 | 0.560643 | 0.551643 | 0.878286 | 0.873571 |
| Array  | SVM | 0.689    | 0.736167 | 0.689    | 0.690833 | 0.936667 | 0.941667 |
| CNV    | SVM | 0.500513 | 0.495897 | 0.500513 | 0.484103 | 0.862564 | 0.746667 |
| Exon   | SVM | 0.748889 | 0.771111 | 0.748889 | 0.748889 | 0.957778 | 0.937778 |
| Meth.  | SVM | 0.637063 | 0.678    | 0.637063 | 0.639563 | 0.876688 | 0.81875  |
| RNASeq | SVM | 0.7812   | 0.8056   | 0.7812   | 0.7836   | 0.956    | 0.9388   |
| RPPA   | SVM | 0.548261 | 0.564783 | 0.548261 | 0.545652 | 0.876522 | 0.793478 |
| SNP    | SVM | 0.387579 | 0.363526 | 0.387579 | 0.342    | 0.814789 | 0.671053 |
| miRNA  | SVM | 0.698571 | 0.7085   | 0.698571 | 0.694214 | 0.917643 | 0.878571 |
| Array  | XGB | 0.715667 | 0.7625   | 0.715667 | 0.7175   | 0.946333 | 0.941667 |
| CNV    | XGB | 0.479744 | 0.489231 | 0.479744 | 0.47359  | 0.86     | 0.778462 |
| Exon   | XGB | 0.763333 | 0.824444 | 0.763333 | 0.774444 | 0.947778 | 0.95     |
| Meth.  | XGB | 0.595313 | 0.62025  | 0.595313 | 0.589313 | 0.857    | 0.818125 |
| RNASeq | XGB | 0.7016   | 0.706    | 0.7016   | 0.696    | 0.9284   | 0.924    |
| RPPA   | XGB | 0.499565 | 0.517391 | 0.499565 | 0.493043 | 0.861739 | 0.775652 |
| SNP    | XGB | 0.404158 | 0.407368 | 0.404158 | 0.391158 | 0.817526 | 0.679579 |
| miRNA  | XGB | 0.602786 | 0.641143 | 0.602786 | 0.599143 | 0.8815   | 0.859286 |

Supplementary Table S5: Modality-wise average MACC values for DL classifiers.

| Modality | Classifier | ACC      | PR       | RE       | F1       | MCC      | AUROC    |
|----------|------------|----------|----------|----------|----------|----------|----------|
| Array    | CNN        | 0.614333 | 0.687    | 0.614333 | 0.613    | 0.912    | 0.926667 |
| CNV      | CNN        | 0.488205 | 0.506667 | 0.488205 | 0.473846 | 0.864615 | 0.771282 |
| Exon     | CNN        | 0.269556 | 0.156222 | 0.269556 | 0.180444 | 0.807667 | 0.603667 |
| Meth.    | CNN        | 0.5495   | 0.556438 | 0.5495   | 0.511    | 0.859    | 0.79375  |
| RNASeq   | CNN        | 0.64808  | 0.64724  | 0.64808  | 0.62692  | 0.9192   | 0.9104   |

|        |             |          |          |          |          |          |          |
|--------|-------------|----------|----------|----------|----------|----------|----------|
| RPPA   | CNN         | 0.521217 | 0.554826 | 0.521217 | 0.521261 | 0.868391 | 0.777435 |
| SNP    | CNN         | 0.351211 | 0.342263 | 0.351211 | 0.312895 | 0.804789 | 0.653053 |
| miRNA  | CNN         | 0.605214 | 0.645429 | 0.605214 | 0.597286 | 0.895643 | 0.888786 |
| Array  | CNN GRU     | 0.286167 | 0.210167 | 0.286167 | 0.2115   | 0.8105   | 0.778333 |
| CNV    | CNN GRU     | 0.476154 | 0.486154 | 0.476154 | 0.464103 | 0.863846 | 0.762564 |
| Exon   | CNN GRU     | 0.214444 | 0.085222 | 0.214444 | 0.119778 | 0.785556 | 0.48     |
| Meth.  | CNN GRU     | 0.286875 | 0.13875  | 0.286875 | 0.180438 | 0.74875  | 0.619188 |
| RNASeq | CNN GRU     | 0.316    | 0.20048  | 0.316    | 0.22892  | 0.8066   | 0.68336  |
| RPPA   | CNN GRU     | 0.492478 | 0.504261 | 0.492478 | 0.473435 | 0.857    | 0.765174 |
| SNP    | CNN GRU     | 0.384368 | 0.363263 | 0.384368 | 0.353316 | 0.814684 | 0.649474 |
| miRNA  | CNN GRU     | 0.415429 | 0.346357 | 0.415429 | 0.360286 | 0.8385   | 0.777286 |
| Array  | CNN LSTM    | 0.257833 | 0.1435   | 0.257833 | 0.173167 | 0.797167 | 0.658333 |
| CNV    | CNN LSTM    | 0.468462 | 0.460256 | 0.468462 | 0.439744 | 0.859487 | 0.757692 |
| Exon   | CNN LSTM    | 0.214111 | 0.085889 | 0.214111 | 0.120111 | 0.785889 | 0.493889 |
| Meth.  | CNN LSTM    | 0.29     | 0.163188 | 0.29     | 0.189188 | 0.754375 | 0.512    |
| RNASeq | CNN LSTM    | 0.27184  | 0.1358   | 0.27184  | 0.1726   | 0.78616  | 0.63364  |
| RPPA   | CNN LSTM    | 0.505652 | 0.512043 | 0.505652 | 0.497783 | 0.864217 | 0.784174 |
| SNP    | CNN LSTM    | 0.344368 | 0.333947 | 0.344368 | 0.292895 | 0.805579 | 0.649737 |
| miRNA  | CNN LSTM    | 0.398643 | 0.3295   | 0.398643 | 0.330571 | 0.821429 | 0.808786 |
| Array  | CNN RNN     | 0.307833 | 0.215167 | 0.307833 | 0.234833 | 0.817167 | 0.678333 |
| CNV    | CNN RNN     | 0.495128 | 0.504103 | 0.495128 | 0.485128 | 0.866923 | 0.761795 |
| Exon   | CNN RNN     | 0.214111 | 0.084444 | 0.214111 | 0.120111 | 0.785889 | 0.498444 |
| Meth.  | CNN RNN     | 0.29875  | 0.165    | 0.29875  | 0.199813 | 0.76375  | 0.641125 |
| RNASeq | CNN RNN     | 0.33252  | 0.257    | 0.33252  | 0.2498   | 0.81024  | 0.75312  |
| RPPA   | CNN RNN     | 0.520261 | 0.544304 | 0.520261 | 0.517565 | 0.869696 | 0.785087 |
| SNP    | CNN RNN     | 0.368    | 0.33     | 0.368    | 0.325737 | 0.809211 | 0.655211 |
| miRNA  | CNN RNN     | 0.450714 | 0.399786 | 0.450714 | 0.401    | 0.847857 | 0.823286 |
| Array  | DEEPGENE    | 0.460333 | 0.474167 | 0.460333 | 0.4445   | 0.879167 | 0.826667 |
| CNV    | DEEPGENE    | 0.445763 | 0.455974 | 0.445763 | 0.431605 | 0.850789 | 0.726053 |
| Exon   | DEEPGENE    | 0.25     | 0.09     | 0.25     | 0.132    | 0.75     | 0.529    |
| Meth.  | DEEPGENE    | 0.463733 | 0.481733 | 0.463733 | 0.4176   | 0.8256   | 0.738    |
| RNASeq | DEEPGENE    | 0.52136  | 0.50688  | 0.52136  | 0.49348  | 0.87156  | 0.80448  |
| RPPA   | DEEPGENE    | 0.447045 | 0.470455 | 0.447045 | 0.436545 | 0.835409 | 0.715273 |
| SNP    | DEEPGENE    | 0.396789 | 0.387368 | 0.396789 | 0.371789 | 0.820737 | 0.662947 |
| miRNA  | DEEPGENE    | 0.614214 | 0.64     | 0.614214 | 0.606357 | 0.897286 | 0.880214 |
| Array  | DENSENET121 | 0.302333 | 0.266333 | 0.302333 | 0.239333 | 0.811    | 0.653333 |
| CNV    | DENSENET121 | 0.328205 | 0.280256 | 0.328205 | 0.27359  | 0.785897 | 0.62     |
| Exon   | DENSENET121 | 0.233778 | 0.183667 | 0.233778 | 0.175111 | 0.786    | 0.518222 |
| Meth.  | DENSENET121 | 0.32275  | 0.307313 | 0.32275  | 0.256813 | 0.780813 | 0.597438 |
| RNASeq | DENSENET121 | 0.334    | 0.30024  | 0.334    | 0.27136  | 0.80636  | 0.68048  |
| RPPA   | DENSENET121 | 0.360739 | 0.352957 | 0.360739 | 0.327174 | 0.807304 | 0.638783 |
| SNP    | DENSENET121 | 0.283895 | 0.182    | 0.283895 | 0.178632 | 0.765    | 0.580263 |
| miRNA  | DENSENET121 | 0.344429 | 0.319    | 0.344429 | 0.285643 | 0.801143 | 0.6535   |

|        |             |          |          |          |          |          |          |
|--------|-------------|----------|----------|----------|----------|----------|----------|
| Array  | DENSENET161 | 0.299667 | 0.276667 | 0.299667 | 0.228667 | 0.815667 | 0.7      |
| CNV    | DENSENET161 | 0.332564 | 0.271538 | 0.332564 | 0.262051 | 0.790513 | 0.628205 |
| Exon   | DENSENET161 | 0.231778 | 0.173889 | 0.231778 | 0.151444 | 0.788444 | 0.519444 |
| Meth.  | DENSENET161 | 0.294313 | 0.2295   | 0.294313 | 0.2275   | 0.749813 | 0.552313 |
| RNASeq | DENSENET161 | 0.34736  | 0.33696  | 0.34736  | 0.27748  | 0.80864  | 0.66196  |
| RPPA   | DENSENET161 | 0.323783 | 0.306348 | 0.323783 | 0.295478 | 0.784174 | 0.580739 |
| SNP    | DENSENET161 | 0.2545   | 0.137278 | 0.2545   | 0.157278 | 0.766944 | 0.554611 |
| miRNA  | DENSENET161 | 0.336571 | 0.343429 | 0.336571 | 0.274    | 0.796643 | 0.651    |
| Array  | DENSENET169 | 0.335333 | 0.3145   | 0.335333 | 0.280333 | 0.830333 | 0.691667 |
| CNV    | DENSENET169 | 0.331282 | 0.277179 | 0.331282 | 0.264872 | 0.792308 | 0.627179 |
| Exon   | DENSENET169 | 0.231111 | 0.153    | 0.231111 | 0.157667 | 0.788889 | 0.532111 |
| Meth.  | DENSENET169 | 0.328563 | 0.324063 | 0.328563 | 0.285313 | 0.7745   | 0.563125 |
| RNASeq | DENSENET169 | 0.35696  | 0.30948  | 0.35696  | 0.27936  | 0.81084  | 0.6792   |
| RPPA   | DENSENET169 | 0.343565 | 0.357478 | 0.343565 | 0.315652 | 0.790913 | 0.599217 |
| SNP    | DENSENET169 | 0.292263 | 0.206737 | 0.292263 | 0.199895 | 0.774579 | 0.592684 |
| miRNA  | DENSENET169 | 0.366571 | 0.343714 | 0.366571 | 0.316214 | 0.807143 | 0.690571 |
| Array  | DENSENET201 | 0.312833 | 0.3075   | 0.312833 | 0.256667 | 0.818333 | 0.691667 |
| CNV    | DENSENET201 | 0.332821 | 0.285385 | 0.332821 | 0.270769 | 0.791538 | 0.624359 |
| Exon   | DENSENET201 | 0.225333 | 0.189111 | 0.225333 | 0.143333 | 0.789    | 0.526778 |
| Meth.  | DENSENET201 | 0.267    | 0.228063 | 0.267    | 0.187563 | 0.738813 | 0.543813 |
| RNASeq | DENSENET201 | 0.34416  | 0.29472  | 0.34416  | 0.27232  | 0.8062   | 0.67076  |
| RPPA   | DENSENET201 | 0.330261 | 0.308043 | 0.330261 | 0.302174 | 0.793217 | 0.606696 |
| SNP    | DENSENET201 | 0.282889 | 0.200278 | 0.282889 | 0.190222 | 0.776722 | 0.533778 |
| miRNA  | DENSENET201 | 0.361929 | 0.350571 | 0.361929 | 0.309571 | 0.809    | 0.682786 |
| Array  | DENSENET264 | 0.343    | 0.282333 | 0.343    | 0.286667 | 0.8265   | 0.66     |
| CNV    | DENSENET264 | 0.320657 | 0.269114 | 0.320657 | 0.253486 | 0.799143 | 0.630543 |
| Exon   | DENSENET264 | 0.238667 | 0.176667 | 0.238667 | 0.176111 | 0.790444 | 0.505778 |
| Meth.  | DENSENET264 | 0.29     | 0.251063 | 0.29     | 0.234375 | 0.743    | 0.561438 |
| RNASeq | DENSENET264 | 0.36528  | 0.3286   | 0.36528  | 0.29932  | 0.81436  | 0.68588  |
| RPPA   | DENSENET264 | 0.344957 | 0.315609 | 0.344957 | 0.309304 | 0.800739 | 0.608478 |
| SNP    | DENSENET264 | 0.273833 | 0.169    | 0.273833 | 0.183722 | 0.772    | 0.547389 |
| miRNA  | DENSENET264 | 0.341643 | 0.294    | 0.341643 | 0.268286 | 0.802    | 0.659429 |
| Array  | GRU         | 0.4895   | 0.5285   | 0.4895   | 0.469833 | 0.8755   | 0.823333 |
| CNV    | GRU         | 0.481282 | 0.497949 | 0.481282 | 0.478974 | 0.863333 | 0.772051 |
| Exon   | GRU         | 0.214444 | 0.085222 | 0.214444 | 0.119778 | 0.785556 | 0.523444 |
| Meth.  | GRU         | 0.576    | 0.606938 | 0.576    | 0.559    | 0.864313 | 0.821938 |
| RNASeq | GRU         | 0.37424  | 0.2974   | 0.37424  | 0.30588  | 0.82376  | 0.65496  |
| RPPA   | GRU         | 0.504    | 0.495696 | 0.504    | 0.482435 | 0.863348 | 0.800348 |
| SNP    | GRU         | 0.315316 | 0.296105 | 0.315316 | 0.280316 | 0.788263 | 0.613526 |
| miRNA  | GRU         | 0.550714 | 0.572214 | 0.550714 | 0.536357 | 0.874    | 0.862571 |
| Array  | LSTM        | 0.472833 | 0.481833 | 0.472833 | 0.444833 | 0.872167 | 0.788333 |
| CNV    | LSTM        | 0.491538 | 0.510513 | 0.491538 | 0.484103 | 0.866923 | 0.785385 |
| Exon   | LSTM        | 0.214444 | 0.085222 | 0.214444 | 0.118667 | 0.785556 | 0.551444 |

|        |           |          |          |          |          |          |          |
|--------|-----------|----------|----------|----------|----------|----------|----------|
| Meth.  | LSTM      | 0.554375 | 0.52825  | 0.554375 | 0.520813 | 0.852    | 0.811    |
| RNASeq | LSTM      | 0.36944  | 0.2886   | 0.36944  | 0.30228  | 0.82096  | 0.66792  |
| RPPA   | LSTM      | 0.461087 | 0.462261 | 0.461087 | 0.434826 | 0.849522 | 0.784435 |
| SNP    | LSTM      | 0.303053 | 0.258947 | 0.303053 | 0.248789 | 0.782947 | 0.602263 |
| miRNA  | LSTM      | 0.495643 | 0.484429 | 0.495643 | 0.466286 | 0.862571 | 0.869929 |
| Array  | MLP       | 0.596167 | 0.650167 | 0.596167 | 0.583167 | 0.908833 | 0.905    |
| CNV    | MLP       | 0.482564 | 0.49     | 0.482564 | 0.473846 | 0.858718 | 0.744872 |
| Exon   | MLP       | 0.412222 | 0.395556 | 0.412222 | 0.362222 | 0.861111 | 0.728889 |
| Meth.  | MLP       | 0.570438 | 0.568563 | 0.570438 | 0.55125  | 0.854625 | 0.815625 |
| RNASeq | MLP       | 0.5564   | 0.5652   | 0.5564   | 0.5272   | 0.8944   | 0.8172   |
| RPPA   | MLP       | 0.541739 | 0.555217 | 0.541739 | 0.536957 | 0.877826 | 0.814348 |
| SNP    | MLP       | 0.365474 | 0.352947 | 0.365474 | 0.327579 | 0.810579 | 0.642211 |
| miRNA  | MLP       | 0.602643 | 0.626786 | 0.602643 | 0.591    | 0.885929 | 0.870714 |
| Array  | NN        | 0.6795   | 0.712833 | 0.6795   | 0.684333 | 0.931    | 0.933333 |
| CNV    | NN        | 0.508718 | 0.503333 | 0.508718 | 0.493077 | 0.866923 | 0.764615 |
| Exon   | NN        | 0.621222 | 0.640111 | 0.621222 | 0.610889 | 0.907556 | 0.859333 |
| Meth.  | NN        | 0.632563 | 0.657188 | 0.632563 | 0.630438 | 0.872188 | 0.816125 |
| RNASeq | NN        | 0.73872  | 0.75164  | 0.73872  | 0.73876  | 0.94096  | 0.93992  |
| RPPA   | NN        | 0.428261 | 0.421304 | 0.428261 | 0.39813  | 0.832    | 0.76487  |
| SNP    | NN        | 0.311842 | 0.323105 | 0.311842 | 0.297474 | 0.784947 | 0.570474 |
| miRNA  | NN        | 0.555143 | 0.607071 | 0.555143 | 0.554071 | 0.876    | 0.820571 |
| Array  | RESNET101 | 0.454833 | 0.470833 | 0.454833 | 0.4075   | 0.867833 | 0.788333 |
| CNV    | RESNET101 | 0.350769 | 0.349231 | 0.350769 | 0.296667 | 0.799744 | 0.658718 |
| Exon   | RESNET101 | 0.332778 | 0.308889 | 0.332778 | 0.275111 | 0.829111 | 0.744556 |
| Meth.  | RESNET101 | 0.556    | 0.596188 | 0.556    | 0.538438 | 0.861625 | 0.8215   |
| RNASeq | RESNET101 | 0.56368  | 0.61524  | 0.56368  | 0.54948  | 0.88688  | 0.88236  |
| RPPA   | RESNET101 | 0.364391 | 0.376826 | 0.364391 | 0.348478 | 0.806435 | 0.645913 |
| SNP    | RESNET101 | 0.290667 | 0.214    | 0.290667 | 0.224722 | 0.779833 | 0.595111 |
| miRNA  | RESNET101 | 0.542643 | 0.562857 | 0.542643 | 0.522643 | 0.876786 | 0.828    |
| Array  | RESNET152 | 0.411167 | 0.463    | 0.411167 | 0.387667 | 0.855167 | 0.781667 |
| CNV    | RESNET152 | 0.332821 | 0.302821 | 0.332821 | 0.273333 | 0.791795 | 0.636923 |
| Exon   | RESNET152 | 0.296889 | 0.254222 | 0.296889 | 0.235667 | 0.812889 | 0.731    |
| Meth.  | RESNET152 | 0.446125 | 0.473438 | 0.446125 | 0.406688 | 0.804625 | 0.733563 |
| RNASeq | RESNET152 | 0.48024  | 0.47296  | 0.48024  | 0.42516  | 0.85676  | 0.82608  |
| RPPA   | RESNET152 | 0.318783 | 0.315565 | 0.318783 | 0.285348 | 0.782565 | 0.596391 |
| SNP    | RESNET152 | 0.308842 | 0.237211 | 0.308842 | 0.250632 | 0.779421 | 0.590368 |
| miRNA  | RESNET152 | 0.512    | 0.531071 | 0.512    | 0.475643 | 0.857286 | 0.791214 |
| Array  | RESNET18  | 0.599    | 0.656333 | 0.599    | 0.604667 | 0.918    | 0.91     |
| CNV    | RESNET18  | 0.359231 | 0.363846 | 0.359231 | 0.320513 | 0.807692 | 0.658205 |
| Exon   | RESNET18  | 0.534667 | 0.575    | 0.534667 | 0.497556 | 0.883556 | 0.911222 |
| Meth.  | RESNET18  | 0.614    | 0.656063 | 0.614    | 0.606875 | 0.873563 | 0.831313 |
| RNASeq | RESNET18  | 0.689    | 0.72656  | 0.689    | 0.687    | 0.93416  | 0.93584  |
| RPPA   | RESNET18  | 0.481435 | 0.526087 | 0.481435 | 0.481304 | 0.847261 | 0.747174 |

|        |          |          |          |          |          |          |          |
|--------|----------|----------|----------|----------|----------|----------|----------|
| SNP    | RESNET18 | 0.322421 | 0.274211 | 0.322421 | 0.263211 | 0.788895 | 0.613632 |
| miRNA  | RESNET18 | 0.636786 | 0.6475   | 0.636786 | 0.626857 | 0.898643 | 0.896786 |
| Array  | RESNET34 | 0.5735   | 0.630667 | 0.5735   | 0.567833 | 0.905833 | 0.883333 |
| CNV    | RESNET34 | 0.360256 | 0.342051 | 0.360256 | 0.313846 | 0.804103 | 0.654359 |
| Exon   | RESNET34 | 0.425778 | 0.384222 | 0.425778 | 0.353444 | 0.854889 | 0.829667 |
| Meth.  | RESNET34 | 0.581375 | 0.652188 | 0.581375 | 0.57625  | 0.85625  | 0.79975  |
| RNASeq | RESNET34 | 0.63992  | 0.70524  | 0.63992  | 0.63104  | 0.91596  | 0.91944  |
| RPPA   | RESNET34 | 0.440957 | 0.453609 | 0.440957 | 0.428522 | 0.833913 | 0.724    |
| SNP    | RESNET34 | 0.323684 | 0.313842 | 0.323684 | 0.261368 | 0.773895 | 0.622579 |
| miRNA  | RESNET34 | 0.626571 | 0.64     | 0.626571 | 0.616714 | 0.899857 | 0.886786 |
| Array  | RESNET50 | 0.474667 | 0.497333 | 0.474667 | 0.441667 | 0.871667 | 0.828333 |
| CNV    | RESNET50 | 0.364359 | 0.358205 | 0.364359 | 0.316154 | 0.806154 | 0.65     |
| Exon   | RESNET50 | 0.429222 | 0.400556 | 0.429222 | 0.37     | 0.843778 | 0.821778 |
| Meth.  | RESNET50 | 0.539563 | 0.561625 | 0.539563 | 0.515625 | 0.846313 | 0.804125 |
| RNASeq | RESNET50 | 0.62832  | 0.70364  | 0.62832  | 0.6294   | 0.9122   | 0.92408  |
| RPPA   | RESNET50 | 0.408522 | 0.476783 | 0.408522 | 0.40713  | 0.81887  | 0.697565 |
| SNP    | RESNET50 | 0.341526 | 0.302316 | 0.341526 | 0.280368 | 0.790842 | 0.626632 |
| miRNA  | RESNET50 | 0.567286 | 0.610071 | 0.567286 | 0.563071 | 0.88     | 0.863929 |
| Array  | RNN      | 0.5045   | 0.5435   | 0.5045   | 0.4915   | 0.8755   | 0.76     |
| CNV    | RNN      | 0.492564 | 0.502821 | 0.492564 | 0.485897 | 0.864872 | 0.767949 |
| Exon   | RNN      | 0.214444 | 0.085222 | 0.214444 | 0.119778 | 0.785556 | 0.507778 |
| Meth.  | RNN      | 0.495625 | 0.473625 | 0.495625 | 0.454125 | 0.839    | 0.782063 |
| RNASeq | RNN      | 0.37892  | 0.29988  | 0.37892  | 0.31316  | 0.8224   | 0.65336  |
| RPPA   | RNN      | 0.561478 | 0.580174 | 0.561478 | 0.555783 | 0.884957 | 0.821261 |
| SNP    | RNN      | 0.361421 | 0.370368 | 0.361421 | 0.340737 | 0.808632 | 0.655368 |
| miRNA  | RNN      | 0.556    | 0.593643 | 0.556    | 0.545071 | 0.8835   | 0.856929 |
