# Supplementary material for: Multi-omics driven computational framework for cancer molecular subtype classification
Source: Sci Rep. 2025 Dec 19;15:44141. doi: 10.1038/s41598-025-32051-5 (PMC12717050; doi:10.1038/s41598-025-32051-5)
Supplement: Supplementary file 2 — Supplementary Information 2. [file 41598_2025_32051_MOESM2_ESM.xlsx]

## Sheet: Sheet1
cancer	modality	scale	type	Classifier	metric	accuracy	precision	recall	f1_score	mcs
coad_k_fold	copy number (gene-level)	Gistic2_all_data_by_genes	DL	DEEPGENE	macro	0.665	0.665	0.665	0.655	0.896
coad_k_fold	copy number (gene-level)	Gistic2_all_data_by_genes	DL		micro	0.832	0.832	0.832	0.832	0.916
coad_k_fold	copy number (gene-level)	Gistic2_all_data_by_genes	DL		weighted	0.832	0.802	0.832	0.812	0.856
coad_k_fold	copy number (gene-level)	Gistic2_all_data_by_genes	DL	CNN	macro	0.693	0.732	0.693	0.692	0.896
coad_k_fold	copy number (gene-level)	Gistic2_all_data_by_genes	DL		micro	0.832	0.832	0.832	0.832	0.916
coad_k_fold	copy number (gene-level)	Gistic2_all_data_by_genes	DL		weighted	0.832	0.831	0.832	0.821	0.857
coad_k_fold	copy number (gene-level)	Gistic2_all_data_by_genes	DL	RESNET34	macro	0.66	0.622	0.66	0.61	0.897
coad_k_fold	copy number (gene-level)	Gistic2_all_data_by_genes	DL		micro	0.827	0.827	0.827	0.827	0.913
coad_k_fold	copy number (gene-level)	Gistic2_all_data_by_genes	DL		weighted	0.827	0.783	0.827	0.79	0.865
coad_k_fold	copy number (gene-level)	Gistic2_all_data_by_genes	DL	CNN_LSTM	macro	0.753	0.796	0.753	0.762	0.913
coad_k_fold	copy number (gene-level)	Gistic2_all_data_by_genes	DL		micro	0.866	0.866	0.866	0.866	0.933
coad_k_fold	copy number (gene-level)	Gistic2_all_data_by_genes	DL		weighted	0.866	0.864	0.866	0.859	0.874
coad_k_fold	copy number (gene-level)	Gistic2_all_data_by_genes	DL	RESNET101	macro	0.58	0.529	0.58	0.543	0.862
coad_k_fold	copy number (gene-level)	Gistic2_all_data_by_genes	DL		micro	0.782	0.782	0.782	0.782	0.891
coad_k_fold	copy number (gene-level)	Gistic2_all_data_by_genes	DL		weighted	0.782	0.723	0.782	0.745	0.805
coad_k_fold	copy number (gene-level)	Gistic2_all_data_by_genes	DL	DENSENET161	macro	0.453	0.37	0.453	0.384	0.755
coad_k_fold	copy number (gene-level)	Gistic2_all_data_by_genes	DL		micro	0.616	0.616	0.616	0.616	0.808
coad_k_fold	copy number (gene-level)	Gistic2_all_data_by_genes	DL		weighted	0.616	0.593	0.616	0.583	0.648
coad_k_fold	copy number (gene-level)	Gistic2_all_data_by_genes	DL	LSTM	macro	0.675	0.657	0.675	0.657	0.892
coad_k_fold	copy number (gene-level)	Gistic2_all_data_by_genes	DL		micro	0.799	0.799	0.799	0.799	0.899
coad_k_fold	copy number (gene-level)	Gistic2_all_data_by_genes	DL		weighted	0.799	0.802	0.799	0.796	0.877
coad_k_fold	copy number (gene-level)	Gistic2_all_data_by_genes	DL	RESNET50	macro	0.646	0.607	0.646	0.611	0.868
coad_k_fold	copy number (gene-level)	Gistic2_all_data_by_genes	DL		micro	0.82	0.82	0.82	0.82	0.91
coad_k_fold	copy number (gene-level)	Gistic2_all_data_by_genes	DL		weighted	0.82	0.751	0.82	0.776	0.785
coad_k_fold	copy number (gene-level)	Gistic2_all_data_by_genes	DL	RNN	macro	0.651	0.657	0.651	0.643	0.883
coad_k_fold	copy number (gene-level)	Gistic2_all_data_by_genes	DL		micro	0.788	0.788	0.788	0.788	0.894
coad_k_fold	copy number (gene-level)	Gistic2_all_data_by_genes	DL		weighted	0.788	0.795	0.788	0.786	0.861
coad_k_fold	copy number (gene-level)	Gistic2_all_data_by_genes	DL	CNN_GRU	macro	0.721	0.731	0.721	0.718	0.915
coad_k_fold	copy number (gene-level)	Gistic2_all_data_by_genes	DL		micro	0.851	0.851	0.851	0.851	0.925
coad_k_fold	copy number (gene-level)	Gistic2_all_data_by_genes	DL		weighted	0.851	0.841	0.851	0.842	0.895
coad_k_fold	copy number (gene-level)	Gistic2_all_data_by_genes	DL	RESNET18	macro	0.677	0.721	0.677	0.666	0.903
coad_k_fold	copy number (gene-level)	Gistic2_all_data_by_genes	DL		micro	0.828	0.828	0.828	0.828	0.914
coad_k_fold	copy number (gene-level)	Gistic2_all_data_by_genes	DL		weighted	0.828	0.832	0.828	0.814	0.881
coad_k_fold	copy number (gene-level)	Gistic2_all_data_by_genes	DL	NN	macro	0.687	0.685	0.687	0.672	0.896
coad_k_fold	copy number (gene-level)	Gistic2_all_data_by_genes	DL		micro	0.817	0.817	0.817	0.817	0.909
coad_k_fold	copy number (gene-level)	Gistic2_all_data_by_genes	DL		weighted	0.817	0.814	0.817	0.808	0.872
coad_k_fold	copy number (gene-level)	Gistic2_all_data_by_genes	DL	DENSENET201	macro	0.44	0.393	0.44	0.375	0.755
coad_k_fold	copy number (gene-level)	Gistic2_all_data_by_genes	DL		micro	0.638	0.638	0.638	0.638	0.819
coad_k_fold	copy number (gene-level)	Gistic2_all_data_by_genes	DL		weighted	0.638	0.602	0.638	0.58	0.626
coad_k_fold	copy number (gene-level)	Gistic2_all_data_by_genes	DL	GRU	macro	0.671	0.665	0.671	0.659	0.889
coad_k_fold	copy number (gene-level)	Gistic2_all_data_by_genes	DL		micro	0.802	0.802	0.802	0.802	0.901
coad_k_fold	copy number (gene-level)	Gistic2_all_data_by_genes	DL		weighted	0.802	0.802	0.802	0.798	0.864
coad_k_fold	copy number (gene-level)	Gistic2_all_data_by_genes	DL	DENSENET264	macro	0.427	0.333	0.427	0.322	0.74
coad_k_fold	copy number (gene-level)	Gistic2_all_data_by_genes	DL		micro	0.581	0.581	0.581	0.581	0.79
coad_k_fold	copy number (gene-level)	Gistic2_all_data_by_genes	DL		weighted	0.581	0.597	0.581	0.531	0.641
coad_k_fold	copy number (gene-level)	Gistic2_all_data_by_genes	DL	RESNET152	macro	0.589	0.559	0.589	0.568	0.848
coad_k_fold	copy number (gene-level)	Gistic2_all_data_by_genes	DL		micro	0.797	0.797	0.797	0.797	0.898
coad_k_fold	copy number (gene-level)	Gistic2_all_data_by_genes	DL		weighted	0.797	0.727	0.797	0.757	0.747
coad_k_fold	copy number (gene-level)	Gistic2_all_data_by_genes	DL	DENSENET169	macro	0.437	0.334	0.437	0.356	0.741
coad_k_fold	copy number (gene-level)	Gistic2_all_data_by_genes	DL		micro	0.643	0.643	0.643	0.643	0.822
coad_k_fold	copy number (gene-level)	Gistic2_all_data_by_genes	DL		weighted	0.643	0.57	0.643	0.576	0.58
coad_k_fold	copy number (gene-level)	Gistic2_all_data_by_genes	DL	CNN_RNN	macro	0.691	0.757	0.691	0.699	0.899
coad_k_fold	copy number (gene-level)	Gistic2_all_data_by_genes	DL		micro	0.828	0.828	0.828	0.828	0.914
coad_k_fold	copy number (gene-level)	Gistic2_all_data_by_genes	DL		weighted	0.828	0.845	0.828	0.825	0.869
coad_k_fold	copy number (gene-level)	Gistic2_all_data_by_genes	DL	DENSENET121	macro	0.449	0.342	0.449	0.348	0.757
coad_k_fold	copy number (gene-level)	Gistic2_all_data_by_genes	DL		micro	0.62	0.62	0.62	0.62	0.81
coad_k_fold	copy number (gene-level)	Gistic2_all_data_by_genes	DL		weighted	0.62	0.595	0.62	0.562	0.651
coad_k_fold	copy number (gene-level)	Gistic2_all_data_by_genes	ML	LIGHTGBM	macro	0.333	0.225	0.333	0.269	0.667
coad_k_fold	copy number (gene-level)	Gistic2_all_data_by_genes	ML		micro	0.675	0.675	0.675	0.675	0.838
coad_k_fold	copy number (gene-level)	Gistic2_all_data_by_genes	ML		weighted	0.675	0.456	0.675	0.545	0.325
coad_k_fold	copy number (gene-level)	Gistic2_all_data_by_genes	ML	GAUSSIAN_NB	macro	0.682	0.717	0.682	0.669	0.889
coad_k_fold	copy number (gene-level)	Gistic2_all_data_by_genes	ML		micro	0.821	0.821	0.821	0.821	0.911
coad_k_fold	copy number (gene-level)	Gistic2_all_data_by_genes	ML		weighted	0.821	0.82	0.821	0.806	0.845
coad_k_fold	copy number (gene-level)	Gistic2_all_data_by_genes	ML	K_NEIGHBORS	macro	0.642	0.596	0.642	0.599	0.88
coad_k_fold	copy number (gene-level)	Gistic2_all_data_by_genes	ML		micro	0.746	0.746	0.746	0.746	0.873
coad_k_fold	copy number (gene-level)	Gistic2_all_data_by_genes	ML		weighted	0.746	0.781	0.746	0.75	0.893
coad_k_fold	copy number (gene-level)	Gistic2_all_data_by_genes	ML	HISTGBOOST	macro	0.681	0.697	0.681	0.68	0.895
coad_k_fold	copy number (gene-level)	Gistic2_all_data_by_genes	ML		micro	0.828	0.828	0.828	0.828	0.914
coad_k_fold	copy number (gene-level)	Gistic2_all_data_by_genes	ML		weighted	0.828	0.815	0.828	0.817	0.857
coad_k_fold	copy number (gene-level)	Gistic2_all_data_by_genes	ML	CATBOOST	macro	0.666	0.651	0.666	0.622	0.892
coad_k_fold	copy number (gene-level)	Gistic2_all_data_by_genes	ML		micro	0.829	0.829	0.829	0.829	0.914
coad_k_fold	copy number (gene-level)	Gistic2_all_data_by_genes	ML		weighted	0.829	0.792	0.829	0.792	0.849
coad_k_fold	copy number (gene-level)	Gistic2_all_data_by_genes	ML	SVM_LINEAR	macro	0.63	0.637	0.63	0.6	0.875
coad_k_fold	copy number (gene-level)	Gistic2_all_data_by_genes	ML		micro	0.806	0.806	0.806	0.806	0.903
coad_k_fold	copy number (gene-level)	Gistic2_all_data_by_genes	ML		weighted	0.806	0.772	0.806	0.774	0.817
coad_k_fold	copy number (gene-level)	Gistic2_all_data_by_genes	ML	BERNOULLI_NB	macro	0.675	0.63	0.675	0.634	0.873
coad_k_fold	copy number (gene-level)	Gistic2_all_data_by_genes	ML		micro	0.72	0.72	0.72	0.72	0.86
coad_k_fold	copy number (gene-level)	Gistic2_all_data_by_genes	ML		weighted	0.72	0.8	0.72	0.746	0.898
coad_k_fold	copy number (gene-level)	Gistic2_all_data_by_genes	ML	LOGISTIC_REGRESSION	macro	0.721	0.69	0.721	0.698	0.903
coad_k_fold	copy number (gene-level)	Gistic2_all_data_by_genes	ML		micro	0.814	0.814	0.814	0.814	0.907
coad_k_fold	copy number (gene-level)	Gistic2_all_data_by_genes	ML		weighted	0.814	0.822	0.814	0.813	0.894
coad_k_fold	copy number (gene-level)	Gistic2_all_data_by_genes	ML	ADA_BOOST	macro	0.642	0.63	0.642	0.624	0.892
coad_k_fold	copy number (gene-level)	Gistic2_all_data_by_genes	ML		micro	0.81	0.81	0.81	0.81	0.905
coad_k_fold	copy number (gene-level)	Gistic2_all_data_by_genes	ML		weighted	0.81	0.786	0.81	0.792	0.868
coad_k_fold	copy number (gene-level)	Gistic2_all_data_by_genes	ML	GBOOST	macro	0.333	0.225	0.333	0.269	0.667
coad_k_fold	copy number (gene-level)	Gistic2_all_data_by_genes	ML		micro	0.675	0.675	0.675	0.675	0.838
coad_k_fold	copy number (gene-level)	Gistic2_all_data_by_genes	ML		weighted	0.675	0.456	0.675	0.545	0.325
coad_k_fold	copy number (gene-level)	Gistic2_all_data_by_genes	ML	XGBOOST	macro	0.622	0.645	0.622	0.62	0.884
coad_k_fold	copy number (gene-level)	Gistic2_all_data_by_genes	ML		micro	0.799	0.799	0.799	0.799	0.899
coad_k_fold	copy number (gene-level)	Gistic2_all_data_by_genes	ML		weighted	0.799	0.789	0.799	0.787	0.853
coad_k_fold	copy number (gene-level)	Gistic2_all_data_by_genes	ML	QUADRATIC_DISCRIMINANT	macro	0.378	0.407	0.378	0.371	0.713
coad_k_fold	copy number (gene-level)	Gistic2_all_data_by_genes	ML		micro	0.489	0.489	0.489	0.489	0.744
coad_k_fold	copy number (gene-level)	Gistic2_all_data_by_genes	ML		weighted	0.489	0.587	0.489	0.519	0.651
coad_k_fold	copy number (gene-level)	Gistic2_all_data_by_genes	ML	MLP	macro	0.662	0.664	0.662	0.651	0.883
coad_k_fold	copy number (gene-level)	Gistic2_all_data_by_genes	ML		micro	0.806	0.806	0.806	0.806	0.903
coad_k_fold	copy number (gene-level)	Gistic2_all_data_by_genes	ML		weighted	0.806	0.796	0.806	0.795	0.843
coad_k_fold	copy number (gene-level)	Gistic2_all_data_by_genes	ML	RANDOM_FOREST	macro	0.626	0.636	0.626	0.625	0.883
coad_k_fold	copy number (gene-level)	Gistic2_all_data_by_genes	ML		micro	0.791	0.791	0.791	0.791	0.896
coad_k_fold	copy number (gene-level)	Gistic2_all_data_by_genes	ML		weighted	0.791	0.788	0.791	0.786	0.858
coad_k_fold	copy number (gene-level)	Gistic2_all_data_by_genes	ML	DECISION_TREE	macro	0.597	0.615	0.597	0.594	0.862
coad_k_fold	copy number (gene-level)	Gistic2_all_data_by_genes	ML		micro	0.754	0.754	0.754	0.754	0.877
coad_k_fold	copy number (gene-level)	Gistic2_all_data_by_genes	ML		weighted	0.754	0.769	0.754	0.755	0.833
coad_k_fold	copy number (gene-level)	Gistic2_all_thresholded	DL	DEEPGENE	macro	0.675	0.737	0.675	0.689	0.877
coad_k_fold	copy number (gene-level)	Gistic2_all_thresholded	DL		micro	0.825	0.825	0.825	0.825	0.912
coad_k_fold	copy number (gene-level)	Gistic2_all_thresholded	DL		weighted	0.825	0.818	0.825	0.812	0.806
coad_k_fold	copy number (gene-level)	Gistic2_all_thresholded	DL	CNN	macro	0.693	0.734	0.693	0.707	0.889
coad_k_fold	copy number (gene-level)	Gistic2_all_thresholded	DL		micro	0.825	0.825	0.825	0.825	0.912
coad_k_fold	copy number (gene-level)	Gistic2_all_thresholded	DL		weighted	0.825	0.827	0.825	0.822	0.843
coad_k_fold	copy number (gene-level)	Gistic2_all_thresholded	DL	RESNET34	macro	0.621	0.557	0.621	0.577	0.878
coad_k_fold	copy number (gene-level)	Gistic2_all_thresholded	DL		micro	0.801	0.801	0.801	0.801	0.901
coad_k_fold	copy number (gene-level)	Gistic2_all_thresholded	DL		weighted	0.801	0.747	0.801	0.766	0.833
coad_k_fold	copy number (gene-level)	Gistic2_all_thresholded	DL	CNN_LSTM	macro	0.703	0.749	0.703	0.713	0.899
coad_k_fold	copy number (gene-level)	Gistic2_all_thresholded	DL		micro	0.825	0.825	0.825	0.825	0.913
coad_k_fold	copy number (gene-level)	Gistic2_all_thresholded	DL		weighted	0.825	0.843	0.825	0.827	0.871
coad_k_fold	copy number (gene-level)	Gistic2_all_thresholded	DL	RESNET101	macro	0.663	0.622	0.663	0.636	0.888
coad_k_fold	copy number (gene-level)	Gistic2_all_thresholded	DL		micro	0.819	0.819	0.819	0.819	0.91
coad_k_fold	copy number (gene-level)	Gistic2_all_thresholded	DL		weighted	0.819	0.775	0.819	0.793	0.844
coad_k_fold	copy number (gene-level)	Gistic2_all_thresholded	DL	DENSENET161	macro	0.4	0.405	0.4	0.347	0.729
coad_k_fold	copy number (gene-level)	Gistic2_all_thresholded	DL		micro	0.606	0.606	0.606	0.606	0.803
coad_k_fold	copy number (gene-level)	Gistic2_all_thresholded	DL		weighted	0.606	0.597	0.606	0.55	0.581
coad_k_fold	copy number (gene-level)	Gistic2_all_thresholded	DL	LSTM	macro	0.665	0.697	0.665	0.67	0.877
coad_k_fold	copy number (gene-level)	Gistic2_all_thresholded	DL		micro	0.81	0.81	0.81	0.81	0.905
coad_k_fold	copy number (gene-level)	Gistic2_all_thresholded	DL		weighted	0.81	0.802	0.81	0.801	0.821
coad_k_fold	copy number (gene-level)	Gistic2_all_thresholded	DL	RESNET50	macro	0.656	0.627	0.656	0.635	0.885
coad_k_fold	copy number (gene-level)	Gistic2_all_thresholded	DL		micro	0.828	0.828	0.828	0.828	0.914
coad_k_fold	copy number (gene-level)	Gistic2_all_thresholded	DL		weighted	0.828	0.775	0.828	0.797	0.827
coad_k_fold	copy number (gene-level)	Gistic2_all_thresholded	DL	RNN	macro	0.606	0.642	0.606	0.618	0.868
coad_k_fold	copy number (gene-level)	Gistic2_all_thresholded	DL		micro	0.78	0.78	0.78	0.78	0.89
coad_k_fold	copy number (gene-level)	Gistic2_all_thresholded	DL		weighted	0.78	0.779	0.78	0.776	0.824
coad_k_fold	copy number (gene-level)	Gistic2_all_thresholded	DL	CNN_GRU	macro	0.71	0.744	0.71	0.707	0.896
coad_k_fold	copy number (gene-level)	Gistic2_all_thresholded	DL		micro	0.829	0.829	0.829	0.829	0.914
coad_k_fold	copy number (gene-level)	Gistic2_all_thresholded	DL		weighted	0.829	0.837	0.829	0.823	0.859
coad_k_fold	copy number (gene-level)	Gistic2_all_thresholded	DL	RESNET18	macro	0.642	0.69	0.642	0.63	0.872
coad_k_fold	copy number (gene-level)	Gistic2_all_thresholded	DL		micro	0.795	0.795	0.795	0.795	0.898
coad_k_fold	copy number (gene-level)	Gistic2_all_thresholded	DL		weighted	0.795	0.8	0.795	0.779	0.82
coad_k_fold	copy number (gene-level)	Gistic2_all_thresholded	DL	NN	macro	0.705	0.701	0.705	0.688	0.905
coad_k_fold	copy number (gene-level)	Gistic2_all_thresholded	DL		micro	0.825	0.825	0.825	0.825	0.912
coad_k_fold	copy number (gene-level)	Gistic2_all_thresholded	DL		weighted	0.825	0.825	0.825	0.817	0.889
coad_k_fold	copy number (gene-level)	Gistic2_all_thresholded	DL	DENSENET201	macro	0.393	0.315	0.393	0.331	0.715
coad_k_fold	copy number (gene-level)	Gistic2_all_thresholded	DL		micro	0.688	0.688	0.688	0.688	0.844
coad_k_fold	copy number (gene-level)	Gistic2_all_thresholded	DL		weighted	0.688	0.539	0.688	0.589	0.457
coad_k_fold	copy number (gene-level)	Gistic2_all_thresholded	DL	GRU	macro	0.658	0.698	0.658	0.662	0.875
coad_k_fold	copy number (gene-level)	Gistic2_all_thresholded	DL		micro	0.806	0.806	0.806	0.806	0.903
coad_k_fold	copy number (gene-level)	Gistic2_all_thresholded	DL		weighted	0.806	0.804	0.806	0.797	0.819
coad_k_fold	copy number (gene-level)	Gistic2_all_thresholded	DL	DENSENET264	macro	0.331	0.244	0.331	0.28	0.669
coad_k_fold	copy number (gene-level)	Gistic2_all_thresholded	DL		micro	0.639	0.639	0.639	0.639	0.82
coad_k_fold	copy number (gene-level)	Gistic2_all_thresholded	DL		weighted	0.639	0.466	0.639	0.538	0.367
coad_k_fold	copy number (gene-level)	Gistic2_all_thresholded	DL	RESNET152	macro	0.417	0.373	0.417	0.379	0.743
coad_k_fold	copy number (gene-level)	Gistic2_all_thresholded	DL		micro	0.715	0.715	0.715	0.715	0.857
coad_k_fold	copy number (gene-level)	Gistic2_all_thresholded	DL		weighted	0.715	0.567	0.715	0.623	0.513
coad_k_fold	copy number (gene-level)	Gistic2_all_thresholded	DL	DENSENET169	macro	0.529	0.45	0.529	0.441	0.804
coad_k_fold	copy number (gene-level)	Gistic2_all_thresholded	DL		micro	0.656	0.656	0.656	0.656	0.828
coad_k_fold	copy number (gene-level)	Gistic2_all_thresholded	DL		weighted	0.656	0.674	0.656	0.618	0.757
coad_k_fold	copy number (gene-level)	Gistic2_all_thresholded	DL	CNN_RNN	macro	0.675	0.718	0.675	0.686	0.888
coad_k_fold	copy number (gene-level)	Gistic2_all_thresholded	DL		micro	0.821	0.821	0.821	0.821	0.91
coad_k_fold	copy number (gene-level)	Gistic2_all_thresholded	DL		weighted	0.821	0.82	0.821	0.815	0.843
coad_k_fold	copy number (gene-level)	Gistic2_all_thresholded	DL	DENSENET121	macro	0.397	0.292	0.397	0.327	0.718
coad_k_fold	copy number (gene-level)	Gistic2_all_thresholded	DL		micro	0.658	0.658	0.658	0.658	0.829
coad_k_fold	copy number (gene-level)	Gistic2_all_thresholded	DL		weighted	0.658	0.521	0.658	0.57	0.494
coad_k_fold	copy number (gene-level)	Gistic2_all_thresholded	ML	LIGHTGBM	macro	0.333	0.225	0.333	0.269	0.667
coad_k_fold	copy number (gene-level)	Gistic2_all_thresholded	ML		micro	0.675	0.675	0.675	0.675	0.838
coad_k_fold	copy number (gene-level)	Gistic2_all_thresholded	ML		weighted	0.675	0.456	0.675	0.545	0.325
coad_k_fold	copy number (gene-level)	Gistic2_all_thresholded	ML	GAUSSIAN_NB	macro	0.617	0.599	0.617	0.601	0.854
coad_k_fold	copy number (gene-level)	Gistic2_all_thresholded	ML		micro	0.735	0.735	0.735	0.735	0.868
coad_k_fold	copy number (gene-level)	Gistic2_all_thresholded	ML		weighted	0.735	0.756	0.735	0.741	0.826
coad_k_fold	copy number (gene-level)	Gistic2_all_thresholded	ML	K_NEIGHBORS	macro	0.618	0.573	0.618	0.577	0.865
coad_k_fold	copy number (gene-level)	Gistic2_all_thresholded	ML		micro	0.717	0.717	0.717	0.717	0.858
coad_k_fold	copy number (gene-level)	Gistic2_all_thresholded	ML		weighted	0.717	0.766	0.717	0.726	0.879
coad_k_fold	copy number (gene-level)	Gistic2_all_thresholded	ML	HISTGBOOST	macro	0.648	0.652	0.648	0.645	0.892
coad_k_fold	copy number (gene-level)	Gistic2_all_thresholded	ML		micro	0.802	0.802	0.802	0.802	0.901
coad_k_fold	copy number (gene-level)	Gistic2_all_thresholded	ML		weighted	0.802	0.801	0.802	0.799	0.873
coad_k_fold	copy number (gene-level)	Gistic2_all_thresholded	ML	CATBOOST	macro	0.681	0.719	0.681	0.658	0.903
coad_k_fold	copy number (gene-level)	Gistic2_all_thresholded	ML		micro	0.836	0.836	0.836	0.836	0.918
coad_k_fold	copy number (gene-level)	Gistic2_all_thresholded	ML		weighted	0.836	0.826	0.836	0.812	0.872
coad_k_fold	copy number (gene-level)	Gistic2_all_thresholded	ML	SVM_LINEAR	macro	0.624	0.594	0.624	0.603	0.876
coad_k_fold	copy number (gene-level)	Gistic2_all_thresholded	ML		micro	0.799	0.799	0.799	0.799	0.899
coad_k_fold	copy number (gene-level)	Gistic2_all_thresholded	ML		weighted	0.799	0.76	0.799	0.776	0.829
coad_k_fold	copy number (gene-level)	Gistic2_all_thresholded	ML	BERNOULLI_NB	macro	0.629	0.566	0.629	0.562	0.843
coad_k_fold	copy number (gene-level)	Gistic2_all_thresholded	ML		micro	0.642	0.642	0.642	0.642	0.821
coad_k_fold	copy number (gene-level)	Gistic2_all_thresholded	ML		weighted	0.642	0.765	0.642	0.669	0.888
coad_k_fold	copy number (gene-level)	Gistic2_all_thresholded	ML	LOGISTIC_REGRESSION	macro	0.61	0.6	0.61	0.597	0.872
coad_k_fold	copy number (gene-level)	Gistic2_all_thresholded	ML		micro	0.758	0.758	0.758	0.758	0.879
coad_k_fold	copy number (gene-level)	Gistic2_all_thresholded	ML		weighted	0.758	0.77	0.758	0.759	0.858
coad_k_fold	copy number (gene-level)	Gistic2_all_thresholded	ML	ADA_BOOST	macro	0.66	0.66	0.66	0.627	0.898
coad_k_fold	copy number (gene-level)	Gistic2_all_thresholded	ML		micro	0.814	0.814	0.814	0.814	0.907
coad_k_fold	copy number (gene-level)	Gistic2_all_thresholded	ML		weighted	0.814	0.803	0.814	0.793	0.881
coad_k_fold	copy number (gene-level)	Gistic2_all_thresholded	ML	GBOOST	macro	0.333	0.225	0.333	0.269	0.667
coad_k_fold	copy number (gene-level)	Gistic2_all_thresholded	ML		micro	0.675	0.675	0.675	0.675	0.838
coad_k_fold	copy number (gene-level)	Gistic2_all_thresholded	ML		weighted	0.675	0.456	0.675	0.545	0.325
coad_k_fold	copy number (gene-level)	Gistic2_all_thresholded	ML	XGBOOST	macro	0.693	0.71	0.693	0.686	0.905
coad_k_fold	copy number (gene-level)	Gistic2_all_thresholded	ML		micro	0.825	0.825	0.825	0.825	0.912
coad_k_fold	copy number (gene-level)	Gistic2_all_thresholded	ML		weighted	0.825	0.833	0.825	0.821	0.89
coad_k_fold	copy number (gene-level)	Gistic2_all_thresholded	ML	QUADRATIC_DISCRIMINANT	macro	0.437	0.47	0.437	0.437	0.752
coad_k_fold	copy number (gene-level)	Gistic2_all_thresholded	ML		micro	0.635	0.635	0.635	0.635	0.817
coad_k_fold	copy number (gene-level)	Gistic2_all_thresholded	ML		weighted	0.635	0.632	0.635	0.622	0.622
coad_k_fold	copy number (gene-level)	Gistic2_all_thresholded	ML	MLP	macro	0.658	0.677	0.658	0.659	0.884
coad_k_fold	copy number (gene-level)	Gistic2_all_thresholded	ML		micro	0.788	0.788	0.788	0.788	0.894
coad_k_fold	copy number (gene-level)	Gistic2_all_thresholded	ML		weighted	0.788	0.809	0.788	0.793	0.863
coad_k_fold	copy number (gene-level)	Gistic2_all_thresholded	ML	RANDOM_FOREST	macro	0.672	0.688	0.672	0.672	0.898
coad_k_fold	copy number (gene-level)	Gistic2_all_thresholded	ML		micro	0.81	0.81	0.81	0.81	0.905
coad_k_fold	copy number (gene-level)	Gistic2_all_thresholded	ML		weighted	0.81	0.822	0.81	0.811	0.883
coad_k_fold	copy number (gene-level)	Gistic2_all_thresholded	ML	DECISION_TREE	macro	0.673	0.665	0.673	0.662	0.895
coad_k_fold	copy number (gene-level)	Gistic2_all_thresholded	ML		micro	0.791	0.791	0.791	0.791	0.896
coad_k_fold	copy number (gene-level)	Gistic2_all_thresholded	ML		weighted	0.791	0.814	0.791	0.797	0.893
coad_k_fold	somatic mutation (SNP and INDEL)	_mc3_gene_level_	DL	DEEPGENE	macro	0.645	0.561	0.645	0.58	0.835
coad_k_fold	somatic mutation (SNP and INDEL)	_mc3_gene_level_	DL		micro	0.746	0.746	0.746	0.746	0.873
coad_k_fold	somatic mutation (SNP and INDEL)	_mc3_gene_level_	DL		weighted	0.746	0.651	0.746	0.686	0.759
coad_k_fold	somatic mutation (SNP and INDEL)	_mc3_gene_level_	DL	CNN	macro	0.67	0.588	0.67	0.619	0.867
coad_k_fold	somatic mutation (SNP and INDEL)	_mc3_gene_level_	DL		micro	0.831	0.831	0.831	0.831	0.915
coad_k_fold	somatic mutation (SNP and INDEL)	_mc3_gene_level_	DL		weighted	0.831	0.755	0.831	0.784	0.771
coad_k_fold	somatic mutation (SNP and INDEL)	_mc3_gene_level_	DL	RESNET34	macro	0.543	0.586	0.543	0.514	0.786
coad_k_fold	somatic mutation (SNP and INDEL)	_mc3_gene_level_	DL		micro	0.789	0.789	0.789	0.789	0.894
coad_k_fold	somatic mutation (SNP and INDEL)	_mc3_gene_level_	DL		weighted	0.789	0.715	0.789	0.717	0.57
coad_k_fold	somatic mutation (SNP and INDEL)	_mc3_gene_level_	DL	CNN_LSTM	macro	0.652	0.615	0.652	0.599	0.859
coad_k_fold	somatic mutation (SNP and INDEL)	_mc3_gene_level_	DL		micro	0.796	0.796	0.796	0.796	0.898
coad_k_fold	somatic mutation (SNP and INDEL)	_mc3_gene_level_	DL		weighted	0.796	0.757	0.796	0.756	0.782
coad_k_fold	somatic mutation (SNP and INDEL)	_mc3_gene_level_	DL	RESNET101	macro	0.608	0.613	0.608	0.593	0.853
coad_k_fold	somatic mutation (SNP and INDEL)	_mc3_gene_level_	DL		micro	0.835	0.835	0.835	0.835	0.918
coad_k_fold	somatic mutation (SNP and INDEL)	_mc3_gene_level_	DL		weighted	0.835	0.761	0.835	0.785	0.723
coad_k_fold	somatic mutation (SNP and INDEL)	_mc3_gene_level_	DL	DENSENET161	macro	0.267	0.18	0.267	0.215	0.626
coad_k_fold	somatic mutation (SNP and INDEL)	_mc3_gene_level_	DL		micro	0.54	0.54	0.54	0.54	0.77
coad_k_fold	somatic mutation (SNP and INDEL)	_mc3_gene_level_	DL		weighted	0.54	0.364	0.54	0.435	0.337
coad_k_fold	somatic mutation (SNP and INDEL)	_mc3_gene_level_	DL	LSTM	macro	0.367	0.43	0.367	0.329	0.687
coad_k_fold	somatic mutation (SNP and INDEL)	_mc3_gene_level_	DL		micro	0.697	0.697	0.697	0.697	0.849
coad_k_fold	somatic mutation (SNP and INDEL)	_mc3_gene_level_	DL		weighted	0.697	0.585	0.697	0.587	0.363
coad_k_fold	somatic mutation (SNP and INDEL)	_mc3_gene_level_	DL	RESNET50	macro	0.667	0.648	0.667	0.65	0.867
coad_k_fold	somatic mutation (SNP and INDEL)	_mc3_gene_level_	DL		micro	0.865	0.865	0.865	0.865	0.933
coad_k_fold	somatic mutation (SNP and INDEL)	_mc3_gene_level_	DL		weighted	0.865	0.778	0.865	0.815	0.736
coad_k_fold	somatic mutation (SNP and INDEL)	_mc3_gene_level_	DL	RNN	macro	0.608	0.602	0.608	0.598	0.832
coad_k_fold	somatic mutation (SNP and INDEL)	_mc3_gene_level_	DL		micro	0.837	0.837	0.837	0.837	0.918
coad_k_fold	somatic mutation (SNP and INDEL)	_mc3_gene_level_	DL		weighted	0.837	0.739	0.837	0.779	0.658
coad_k_fold	somatic mutation (SNP and INDEL)	_mc3_gene_level_	DL	CNN_GRU	macro	0.623	0.533	0.623	0.546	0.844
coad_k_fold	somatic mutation (SNP and INDEL)	_mc3_gene_level_	DL		micro	0.736	0.736	0.736	0.736	0.868
coad_k_fold	somatic mutation (SNP and INDEL)	_mc3_gene_level_	DL		weighted	0.736	0.72	0.736	0.707	0.797
coad_k_fold	somatic mutation (SNP and INDEL)	_mc3_gene_level_	DL	RESNET18	macro	0.667	0.613	0.667	0.638	0.866
coad_k_fold	somatic mutation (SNP and INDEL)	_mc3_gene_level_	DL		micro	0.87	0.87	0.87	0.87	0.935
coad_k_fold	somatic mutation (SNP and INDEL)	_mc3_gene_level_	DL		weighted	0.87	0.761	0.87	0.811	0.728
coad_k_fold	somatic mutation (SNP and INDEL)	_mc3_gene_level_	DL	NN	macro	0.62	0.532	0.62	0.536	0.816
coad_k_fold	somatic mutation (SNP and INDEL)	_mc3_gene_level_	DL		micro	0.63	0.63	0.63	0.63	0.815
coad_k_fold	somatic mutation (SNP and INDEL)	_mc3_gene_level_	DL		weighted	0.63	0.723	0.63	0.637	0.818
coad_k_fold	somatic mutation (SNP and INDEL)	_mc3_gene_level_	DL	DENSENET201	macro	0.344	0.279	0.344	0.262	0.677
coad_k_fold	somatic mutation (SNP and INDEL)	_mc3_gene_level_	DL		micro	0.583	0.583	0.583	0.583	0.791
coad_k_fold	somatic mutation (SNP and INDEL)	_mc3_gene_level_	DL		weighted	0.583	0.453	0.583	0.48	0.447
coad_k_fold	somatic mutation (SNP and INDEL)	_mc3_gene_level_	DL	GRU	macro	0.401	0.57	0.401	0.386	0.707
coad_k_fold	somatic mutation (SNP and INDEL)	_mc3_gene_level_	DL		micro	0.721	0.721	0.721	0.721	0.861
coad_k_fold	somatic mutation (SNP and INDEL)	_mc3_gene_level_	DL		weighted	0.721	0.673	0.721	0.629	0.4
coad_k_fold	somatic mutation (SNP and INDEL)	_mc3_gene_level_	DL	DENSENET264	macro	0.371	0.233	0.371	0.247	0.663
coad_k_fold	somatic mutation (SNP and INDEL)	_mc3_gene_level_	DL		micro	0.374	0.374	0.374	0.374	0.687
coad_k_fold	somatic mutation (SNP and INDEL)	_mc3_gene_level_	DL		weighted	0.374	0.274	0.374	0.294	0.614
coad_k_fold	somatic mutation (SNP and INDEL)	_mc3_gene_level_	DL	RESNET152	macro	0.65	0.61	0.65	0.626	0.856
coad_k_fold	somatic mutation (SNP and INDEL)	_mc3_gene_level_	DL		micro	0.861	0.861	0.861	0.861	0.93
coad_k_fold	somatic mutation (SNP and INDEL)	_mc3_gene_level_	DL		weighted	0.861	0.755	0.861	0.802	0.709
coad_k_fold	somatic mutation (SNP and INDEL)	_mc3_gene_level_	DL	DENSENET169	macro	0.333	0.194	0.333	0.237	0.667
coad_k_fold	somatic mutation (SNP and INDEL)	_mc3_gene_level_	DL		micro	0.583	0.583	0.583	0.583	0.791
coad_k_fold	somatic mutation (SNP and INDEL)	_mc3_gene_level_	DL		weighted	0.583	0.378	0.583	0.454	0.417
coad_k_fold	somatic mutation (SNP and INDEL)	_mc3_gene_level_	DL	CNN_RNN	macro	0.668	0.578	0.668	0.616	0.862
coad_k_fold	somatic mutation (SNP and INDEL)	_mc3_gene_level_	DL		micro	0.827	0.827	0.827	0.827	0.913
coad_k_fold	somatic mutation (SNP and INDEL)	_mc3_gene_level_	DL		weighted	0.827	0.746	0.827	0.781	0.758
coad_k_fold	somatic mutation (SNP and INDEL)	_mc3_gene_level_	DL	DENSENET121	macro	0.267	0.181	0.267	0.216	0.626
coad_k_fold	somatic mutation (SNP and INDEL)	_mc3_gene_level_	DL		micro	0.543	0.543	0.543	0.543	0.771
coad_k_fold	somatic mutation (SNP and INDEL)	_mc3_gene_level_	DL		weighted	0.543	0.368	0.543	0.439	0.334
coad_k_fold	somatic mutation (SNP and INDEL)	_mc3_gene_level_	ML	LIGHTGBM	macro	0.333	0.226	0.333	0.27	0.667
coad_k_fold	somatic mutation (SNP and INDEL)	_mc3_gene_level_	ML		micro	0.679	0.679	0.679	0.679	0.84
coad_k_fold	somatic mutation (SNP and INDEL)	_mc3_gene_level_	ML		weighted	0.679	0.462	0.679	0.55	0.321
coad_k_fold	somatic mutation (SNP and INDEL)	_mc3_gene_level_	ML	GAUSSIAN_NB	macro	0.333	0.064	0.333	0.107	0.667
coad_k_fold	somatic mutation (SNP and INDEL)	_mc3_gene_level_	ML		micro	0.191	0.191	0.191	0.191	0.596
coad_k_fold	somatic mutation (SNP and INDEL)	_mc3_gene_level_	ML		weighted	0.191	0.037	0.191	0.062	0.809
coad_k_fold	somatic mutation (SNP and INDEL)	_mc3_gene_level_	ML	K_NEIGHBORS	macro	0.333	0.226	0.333	0.27	0.667
coad_k_fold	somatic mutation (SNP and INDEL)	_mc3_gene_level_	ML		micro	0.679	0.679	0.679	0.679	0.84
coad_k_fold	somatic mutation (SNP and INDEL)	_mc3_gene_level_	ML		weighted	0.679	0.462	0.679	0.55	0.321
coad_k_fold	somatic mutation (SNP and INDEL)	_mc3_gene_level_	ML	HISTGBOOST	macro	0.753	0.829	0.753	0.778	0.886
coad_k_fold	somatic mutation (SNP and INDEL)	_mc3_gene_level_	ML		micro	0.856	0.856	0.856	0.856	0.928
coad_k_fold	somatic mutation (SNP and INDEL)	_mc3_gene_level_	ML		weighted	0.856	0.867	0.856	0.855	0.802
coad_k_fold	somatic mutation (SNP and INDEL)	_mc3_gene_level_	ML	CATBOOST	macro	0.367	0.498	0.367	0.332	0.686
coad_k_fold	somatic mutation (SNP and INDEL)	_mc3_gene_level_	ML		micro	0.698	0.698	0.698	0.698	0.849
coad_k_fold	somatic mutation (SNP and INDEL)	_mc3_gene_level_	ML		weighted	0.698	0.623	0.698	0.59	0.361
coad_k_fold	somatic mutation (SNP and INDEL)	_mc3_gene_level_	ML	SVM_LINEAR	macro	0.625	0.605	0.625	0.61	0.841
coad_k_fold	somatic mutation (SNP and INDEL)	_mc3_gene_level_	ML		micro	0.847	0.847	0.847	0.847	0.923
coad_k_fold	somatic mutation (SNP and INDEL)	_mc3_gene_level_	ML		weighted	0.847	0.746	0.847	0.789	0.676
coad_k_fold	somatic mutation (SNP and INDEL)	_mc3_gene_level_	ML	BERNOULLI_NB	macro	0.575	0.596	0.575	0.574	0.811
coad_k_fold	somatic mutation (SNP and INDEL)	_mc3_gene_level_	ML		micro	0.818	0.818	0.818	0.818	0.909
coad_k_fold	somatic mutation (SNP and INDEL)	_mc3_gene_level_	ML		weighted	0.818	0.728	0.818	0.76	0.615
coad_k_fold	somatic mutation (SNP and INDEL)	_mc3_gene_level_	ML	LOGISTIC_REGRESSION	macro	0.633	0.607	0.633	0.615	0.846
coad_k_fold	somatic mutation (SNP and INDEL)	_mc3_gene_level_	ML		micro	0.852	0.852	0.852	0.852	0.926
coad_k_fold	somatic mutation (SNP and INDEL)	_mc3_gene_level_	ML		weighted	0.852	0.75	0.852	0.794	0.687
coad_k_fold	somatic mutation (SNP and INDEL)	_mc3_gene_level_	ML	ADA_BOOST	macro	0.487	0.582	0.487	0.492	0.758
coad_k_fold	somatic mutation (SNP and INDEL)	_mc3_gene_level_	ML		micro	0.761	0.761	0.761	0.761	0.88
coad_k_fold	somatic mutation (SNP and INDEL)	_mc3_gene_level_	ML		weighted	0.761	0.699	0.761	0.697	0.514
coad_k_fold	somatic mutation (SNP and INDEL)	_mc3_gene_level_	ML	GBOOST	macro	0.333	0.226	0.333	0.27	0.667
coad_k_fold	somatic mutation (SNP and INDEL)	_mc3_gene_level_	ML		micro	0.679	0.679	0.679	0.679	0.84
coad_k_fold	somatic mutation (SNP and INDEL)	_mc3_gene_level_	ML		weighted	0.679	0.462	0.679	0.55	0.321
coad_k_fold	somatic mutation (SNP and INDEL)	_mc3_gene_level_	ML	XGBOOST	macro	0.751	0.853	0.751	0.78	0.889
coad_k_fold	somatic mutation (SNP and INDEL)	_mc3_gene_level_	ML		micro	0.871	0.871	0.871	0.871	0.935
coad_k_fold	somatic mutation (SNP and INDEL)	_mc3_gene_level_	ML		weighted	0.871	0.874	0.871	0.861	0.795
coad_k_fold	somatic mutation (SNP and INDEL)	_mc3_gene_level_	ML	QUADRATIC_DISCRIMINANT	macro	0.382	0.376	0.382	0.355	0.695
coad_k_fold	somatic mutation (SNP and INDEL)	_mc3_gene_level_	ML		micro	0.646	0.646	0.646	0.646	0.823
coad_k_fold	somatic mutation (SNP and INDEL)	_mc3_gene_level_	ML		weighted	0.646	0.557	0.646	0.58	0.439
coad_k_fold	somatic mutation (SNP and INDEL)	_mc3_gene_level_	ML	MLP	macro	0.408	0.504	0.408	0.391	0.711
coad_k_fold	somatic mutation (SNP and INDEL)	_mc3_gene_level_	ML		micro	0.723	0.723	0.723	0.723	0.861
coad_k_fold	somatic mutation (SNP and INDEL)	_mc3_gene_level_	ML		weighted	0.723	0.636	0.723	0.63	0.412
coad_k_fold	somatic mutation (SNP and INDEL)	_mc3_gene_level_	ML	COMPLEMENT_NB	macro	0.345	0.266	0.345	0.132	0.673
coad_k_fold	somatic mutation (SNP and INDEL)	_mc3_gene_level_	ML		micro	0.215	0.215	0.215	0.215	0.608
coad_k_fold	somatic mutation (SNP and INDEL)	_mc3_gene_level_	ML		weighted	0.215	0.443	0.215	0.107	0.805
coad_k_fold	somatic mutation (SNP and INDEL)	_mc3_gene_level_	ML	RANDOM_FOREST	macro	0.625	0.609	0.625	0.611	0.848
coad_k_fold	somatic mutation (SNP and INDEL)	_mc3_gene_level_	ML		micro	0.847	0.847	0.847	0.847	0.923
coad_k_fold	somatic mutation (SNP and INDEL)	_mc3_gene_level_	ML		weighted	0.847	0.753	0.847	0.793	0.696
coad_k_fold	somatic mutation (SNP and INDEL)	_mc3_gene_level_	ML	DECISION_TREE	macro	0.573	0.642	0.573	0.586	0.804
coad_k_fold	somatic mutation (SNP and INDEL)	_mc3_gene_level_	ML		micro	0.756	0.756	0.756	0.756	0.878
coad_k_fold	somatic mutation (SNP and INDEL)	_mc3_gene_level_	ML		weighted	0.756	0.741	0.756	0.735	0.658
coad_k_fold	miRNA mature strand expression RNAseq	miRNA_GA_gene	DL	DEEPGENE	macro	0.422	0.325	0.422	0.365	0.729
coad_k_fold	miRNA mature strand expression RNAseq	miRNA_GA_gene	DL		micro	0.698	0.698	0.698	0.698	0.849
coad_k_fold	miRNA mature strand expression RNAseq	miRNA_GA_gene	DL		weighted	0.698	0.51	0.698	0.587	0.488
coad_k_fold	miRNA mature strand expression RNAseq	miRNA_GA_gene	DL	CNN	macro	0.593	0.688	0.593	0.6	0.796
coad_k_fold	miRNA mature strand expression RNAseq	miRNA_GA_gene	DL		micro	0.764	0.764	0.764	0.764	0.882
coad_k_fold	miRNA mature strand expression RNAseq	miRNA_GA_gene	DL		weighted	0.764	0.712	0.764	0.709	0.624
coad_k_fold	miRNA mature strand expression RNAseq	miRNA_GA_gene	DL	RESNET34	macro	0.567	0.535	0.567	0.51	0.775
coad_k_fold	miRNA mature strand expression RNAseq	miRNA_GA_gene	DL		micro	0.684	0.684	0.684	0.684	0.842
coad_k_fold	miRNA mature strand expression RNAseq	miRNA_GA_gene	DL		weighted	0.684	0.636	0.684	0.625	0.64
coad_k_fold	miRNA mature strand expression RNAseq	miRNA_GA_gene	DL	CNN_LSTM	macro	0.333	0.215	0.333	0.261	0.667
coad_k_fold	miRNA mature strand expression RNAseq	miRNA_GA_gene	DL		micro	0.645	0.645	0.645	0.645	0.822
coad_k_fold	miRNA mature strand expression RNAseq	miRNA_GA_gene	DL		weighted	0.645	0.417	0.645	0.506	0.355
coad_k_fold	miRNA mature strand expression RNAseq	miRNA_GA_gene	DL	RESNET101	macro	0.561	0.534	0.561	0.529	0.794
coad_k_fold	miRNA mature strand expression RNAseq	miRNA_GA_gene	DL		micro	0.723	0.723	0.723	0.723	0.862
coad_k_fold	miRNA mature strand expression RNAseq	miRNA_GA_gene	DL		weighted	0.723	0.656	0.723	0.674	0.658
coad_k_fold	miRNA mature strand expression RNAseq	miRNA_GA_gene	DL	DENSENET161	macro	0.398	0.279	0.398	0.272	0.682
coad_k_fold	miRNA mature strand expression RNAseq	miRNA_GA_gene	DL		micro	0.445	0.445	0.445	0.445	0.722
coad_k_fold	miRNA mature strand expression RNAseq	miRNA_GA_gene	DL		weighted	0.445	0.471	0.445	0.398	0.603
coad_k_fold	miRNA mature strand expression RNAseq	miRNA_GA_gene	DL	LSTM	macro	0.333	0.215	0.333	0.261	0.667
coad_k_fold	miRNA mature strand expression RNAseq	miRNA_GA_gene	DL		micro	0.645	0.645	0.645	0.645	0.822
coad_k_fold	miRNA mature strand expression RNAseq	miRNA_GA_gene	DL		weighted	0.645	0.417	0.645	0.506	0.355
coad_k_fold	miRNA mature strand expression RNAseq	miRNA_GA_gene	DL	RESNET50	macro	0.445	0.363	0.445	0.392	0.729
coad_k_fold	miRNA mature strand expression RNAseq	miRNA_GA_gene	DL		micro	0.684	0.684	0.684	0.684	0.842
coad_k_fold	miRNA mature strand expression RNAseq	miRNA_GA_gene	DL		weighted	0.684	0.542	0.684	0.595	0.502
coad_k_fold	miRNA mature strand expression RNAseq	miRNA_GA_gene	DL	RNN	macro	0.433	0.463	0.433	0.41	0.722
coad_k_fold	miRNA mature strand expression RNAseq	miRNA_GA_gene	DL		micro	0.698	0.698	0.698	0.698	0.849
coad_k_fold	miRNA mature strand expression RNAseq	miRNA_GA_gene	DL		weighted	0.698	0.571	0.698	0.6	0.467
coad_k_fold	miRNA mature strand expression RNAseq	miRNA_GA_gene	DL	CNN_GRU	macro	0.333	0.215	0.333	0.261	0.667
coad_k_fold	miRNA mature strand expression RNAseq	miRNA_GA_gene	DL		micro	0.645	0.645	0.645	0.645	0.822
coad_k_fold	miRNA mature strand expression RNAseq	miRNA_GA_gene	DL		weighted	0.645	0.417	0.645	0.506	0.355
coad_k_fold	miRNA mature strand expression RNAseq	miRNA_GA_gene	DL	RESNET18	macro	0.595	0.609	0.595	0.554	0.824
coad_k_fold	miRNA mature strand expression RNAseq	miRNA_GA_gene	DL		micro	0.696	0.696	0.696	0.696	0.848
coad_k_fold	miRNA mature strand expression RNAseq	miRNA_GA_gene	DL		weighted	0.696	0.733	0.696	0.663	0.778
coad_k_fold	miRNA mature strand expression RNAseq	miRNA_GA_gene	DL	NN	macro	0.608	0.668	0.608	0.605	0.8
coad_k_fold	miRNA mature strand expression RNAseq	miRNA_GA_gene	DL		micro	0.765	0.765	0.765	0.765	0.882
coad_k_fold	miRNA mature strand expression RNAseq	miRNA_GA_gene	DL		weighted	0.765	0.708	0.765	0.713	0.634
coad_k_fold	miRNA mature strand expression RNAseq	miRNA_GA_gene	DL	DENSENET201	macro	0.311	0.207	0.311	0.248	0.648
coad_k_fold	miRNA mature strand expression RNAseq	miRNA_GA_gene	DL		micro	0.596	0.596	0.596	0.596	0.798
coad_k_fold	miRNA mature strand expression RNAseq	miRNA_GA_gene	DL		weighted	0.596	0.396	0.596	0.475	0.349
coad_k_fold	miRNA mature strand expression RNAseq	miRNA_GA_gene	DL	GRU	macro	0.333	0.215	0.333	0.261	0.667
coad_k_fold	miRNA mature strand expression RNAseq	miRNA_GA_gene	DL		micro	0.645	0.645	0.645	0.645	0.822
coad_k_fold	miRNA mature strand expression RNAseq	miRNA_GA_gene	DL		weighted	0.645	0.417	0.645	0.506	0.355
coad_k_fold	miRNA mature strand expression RNAseq	miRNA_GA_gene	DL	DENSENET264	macro	0.333	0.234	0.333	0.252	0.653
coad_k_fold	miRNA mature strand expression RNAseq	miRNA_GA_gene	DL		micro	0.555	0.555	0.555	0.555	0.778
coad_k_fold	miRNA mature strand expression RNAseq	miRNA_GA_gene	DL		weighted	0.555	0.466	0.555	0.488	0.405
coad_k_fold	miRNA mature strand expression RNAseq	miRNA_GA_gene	DL	RESNET152	macro	0.433	0.38	0.433	0.384	0.737
coad_k_fold	miRNA mature strand expression RNAseq	miRNA_GA_gene	DL		micro	0.614	0.614	0.614	0.614	0.807
coad_k_fold	miRNA mature strand expression RNAseq	miRNA_GA_gene	DL		weighted	0.614	0.594	0.614	0.579	0.595
coad_k_fold	miRNA mature strand expression RNAseq	miRNA_GA_gene	DL	DENSENET169	macro	0.273	0.23	0.273	0.245	0.633
coad_k_fold	miRNA mature strand expression RNAseq	miRNA_GA_gene	DL		micro	0.468	0.468	0.468	0.468	0.734
coad_k_fold	miRNA mature strand expression RNAseq	miRNA_GA_gene	DL		weighted	0.468	0.392	0.468	0.417	0.432
coad_k_fold	miRNA mature strand expression RNAseq	miRNA_GA_gene	DL	CNN_RNN	macro	0.333	0.215	0.333	0.261	0.667
coad_k_fold	miRNA mature strand expression RNAseq	miRNA_GA_gene	DL		micro	0.645	0.645	0.645	0.645	0.822
coad_k_fold	miRNA mature strand expression RNAseq	miRNA_GA_gene	DL		weighted	0.645	0.417	0.645	0.506	0.355
coad_k_fold	miRNA mature strand expression RNAseq	miRNA_GA_gene	DL	DENSENET121	macro	0.301	0.234	0.301	0.26	0.649
coad_k_fold	miRNA mature strand expression RNAseq	miRNA_GA_gene	DL		micro	0.562	0.562	0.562	0.562	0.781
coad_k_fold	miRNA mature strand expression RNAseq	miRNA_GA_gene	DL		weighted	0.562	0.43	0.562	0.483	0.383
coad_k_fold	miRNA mature strand expression RNAseq	miRNA_GA_gene	ML	LIGHTGBM	macro	0.333	0.215	0.333	0.261	0.667
coad_k_fold	miRNA mature strand expression RNAseq	miRNA_GA_gene	ML		micro	0.645	0.645	0.645	0.645	0.822
coad_k_fold	miRNA mature strand expression RNAseq	miRNA_GA_gene	ML		weighted	0.645	0.417	0.645	0.506	0.355
coad_k_fold	miRNA mature strand expression RNAseq	miRNA_GA_gene	ML	GAUSSIAN_NB	macro	0.378	0.289	0.378	0.319	0.693
coad_k_fold	miRNA mature strand expression RNAseq	miRNA_GA_gene	ML		micro	0.672	0.672	0.672	0.672	0.836
coad_k_fold	miRNA mature strand expression RNAseq	miRNA_GA_gene	ML		weighted	0.672	0.47	0.672	0.547	0.408
coad_k_fold	miRNA mature strand expression RNAseq	miRNA_GA_gene	ML	K_NEIGHBORS	macro	0.467	0.426	0.467	0.424	0.762
coad_k_fold	miRNA mature strand expression RNAseq	miRNA_GA_gene	ML		micro	0.711	0.711	0.711	0.711	0.855
coad_k_fold	miRNA mature strand expression RNAseq	miRNA_GA_gene	ML		weighted	0.711	0.578	0.711	0.623	0.576
coad_k_fold	miRNA mature strand expression RNAseq	miRNA_GA_gene	ML	HISTGBOOST	macro	0.559	0.589	0.559	0.55	0.804
coad_k_fold	miRNA mature strand expression RNAseq	miRNA_GA_gene	ML		micro	0.712	0.712	0.712	0.712	0.856
coad_k_fold	miRNA mature strand expression RNAseq	miRNA_GA_gene	ML		weighted	0.712	0.689	0.712	0.686	0.699
coad_k_fold	miRNA mature strand expression RNAseq	miRNA_GA_gene	ML	CATBOOST	macro	0.333	0.215	0.333	0.261	0.667
coad_k_fold	miRNA mature strand expression RNAseq	miRNA_GA_gene	ML		micro	0.645	0.645	0.645	0.645	0.822
coad_k_fold	miRNA mature strand expression RNAseq	miRNA_GA_gene	ML		weighted	0.645	0.417	0.645	0.506	0.355
coad_k_fold	miRNA mature strand expression RNAseq	miRNA_GA_gene	ML	SVM_LINEAR	macro	0.746	0.809	0.746	0.749	0.876
coad_k_fold	miRNA mature strand expression RNAseq	miRNA_GA_gene	ML		micro	0.83	0.83	0.83	0.83	0.915
coad_k_fold	miRNA mature strand expression RNAseq	miRNA_GA_gene	ML		weighted	0.83	0.836	0.83	0.815	0.798
coad_k_fold	miRNA mature strand expression RNAseq	miRNA_GA_gene	ML	BERNOULLI_NB	macro	0.333	0.215	0.333	0.261	0.667
coad_k_fold	miRNA mature strand expression RNAseq	miRNA_GA_gene	ML		micro	0.645	0.645	0.645	0.645	0.822
coad_k_fold	miRNA mature strand expression RNAseq	miRNA_GA_gene	ML		weighted	0.645	0.417	0.645	0.506	0.355
coad_k_fold	miRNA mature strand expression RNAseq	miRNA_GA_gene	ML	LOGISTIC_REGRESSION	macro	0.753	0.831	0.753	0.766	0.881
coad_k_fold	miRNA mature strand expression RNAseq	miRNA_GA_gene	ML		micro	0.843	0.843	0.843	0.843	0.922
coad_k_fold	miRNA mature strand expression RNAseq	miRNA_GA_gene	ML		weighted	0.843	0.845	0.843	0.828	0.801
coad_k_fold	miRNA mature strand expression RNAseq	miRNA_GA_gene	ML	ADA_BOOST	macro	0.473	0.438	0.473	0.436	0.746
coad_k_fold	miRNA mature strand expression RNAseq	miRNA_GA_gene	ML		micro	0.672	0.672	0.672	0.672	0.836
coad_k_fold	miRNA mature strand expression RNAseq	miRNA_GA_gene	ML		weighted	0.672	0.573	0.672	0.606	0.566
coad_k_fold	miRNA mature strand expression RNAseq	miRNA_GA_gene	ML	GBOOST	macro	0.333	0.215	0.333	0.261	0.667
coad_k_fold	miRNA mature strand expression RNAseq	miRNA_GA_gene	ML		micro	0.645	0.645	0.645	0.645	0.822
coad_k_fold	miRNA mature strand expression RNAseq	miRNA_GA_gene	ML		weighted	0.645	0.417	0.645	0.506	0.355
coad_k_fold	miRNA mature strand expression RNAseq	miRNA_GA_gene	ML	XGBOOST	macro	0.557	0.54	0.557	0.518	0.779
coad_k_fold	miRNA mature strand expression RNAseq	miRNA_GA_gene	ML		micro	0.712	0.712	0.712	0.712	0.856
coad_k_fold	miRNA mature strand expression RNAseq	miRNA_GA_gene	ML		weighted	0.712	0.629	0.712	0.649	0.625
coad_k_fold	miRNA mature strand expression RNAseq	miRNA_GA_gene	ML	QUADRATIC_DISCRIMINANT	macro	0.427	0.396	0.427	0.402	0.725
coad_k_fold	miRNA mature strand expression RNAseq	miRNA_GA_gene	ML		micro	0.567	0.567	0.567	0.567	0.783
coad_k_fold	miRNA mature strand expression RNAseq	miRNA_GA_gene	ML		weighted	0.567	0.563	0.567	0.555	0.609
coad_k_fold	miRNA mature strand expression RNAseq	miRNA_GA_gene	ML	MLP	macro	0.541	0.712	0.541	0.573	0.773
coad_k_fold	miRNA mature strand expression RNAseq	miRNA_GA_gene	ML		micro	0.737	0.737	0.737	0.737	0.868
coad_k_fold	miRNA mature strand expression RNAseq	miRNA_GA_gene	ML		weighted	0.737	0.724	0.737	0.694	0.583
coad_k_fold	miRNA mature strand expression RNAseq	miRNA_GA_gene	ML	COMPLEMENT_NB	macro	0.471	0.537	0.471	0.465	0.743
coad_k_fold	miRNA mature strand expression RNAseq	miRNA_GA_gene	ML		micro	0.711	0.711	0.711	0.711	0.855
coad_k_fold	miRNA mature strand expression RNAseq	miRNA_GA_gene	ML		weighted	0.711	0.624	0.711	0.635	0.518
coad_k_fold	miRNA mature strand expression RNAseq	miRNA_GA_gene	ML	RANDOM_FOREST	macro	0.359	0.283	0.359	0.304	0.674
coad_k_fold	miRNA mature strand expression RNAseq	miRNA_GA_gene	ML		micro	0.645	0.645	0.645	0.645	0.822
coad_k_fold	miRNA mature strand expression RNAseq	miRNA_GA_gene	ML		weighted	0.645	0.446	0.645	0.522	0.378
coad_k_fold	miRNA mature strand expression RNAseq	miRNA_GA_gene	ML	DECISION_TREE	macro	0.503	0.538	0.503	0.488	0.768
coad_k_fold	miRNA mature strand expression RNAseq	miRNA_GA_gene	ML		micro	0.617	0.617	0.617	0.617	0.808
coad_k_fold	miRNA mature strand expression RNAseq	miRNA_GA_gene	ML		weighted	0.617	0.641	0.617	0.609	0.688
coad_k_fold	protein expression RPPA	RPPA_RBN_	DL	DEEPGENE	macro	0.427	0.422	0.427	0.419	0.728
coad_k_fold	protein expression RPPA	RPPA_RBN_	DL		micro	0.578	0.578	0.578	0.578	0.789
coad_k_fold	protein expression RPPA	RPPA_RBN_	DL		weighted	0.578	0.557	0.578	0.563	0.605
coad_k_fold	protein expression RPPA	RPPA_RBN_	DL	CNN	macro	0.583	0.661	0.583	0.603	0.806
coad_k_fold	protein expression RPPA	RPPA_RBN_	DL		micro	0.719	0.719	0.719	0.719	0.859
coad_k_fold	protein expression RPPA	RPPA_RBN_	DL		weighted	0.719	0.717	0.719	0.706	0.7
coad_k_fold	protein expression RPPA	RPPA_RBN_	DL	RESNET34	macro	0.533	0.564	0.533	0.517	0.78
coad_k_fold	protein expression RPPA	RPPA_RBN_	DL		micro	0.661	0.661	0.661	0.661	0.831
coad_k_fold	protein expression RPPA	RPPA_RBN_	DL		weighted	0.661	0.656	0.661	0.639	0.679
coad_k_fold	protein expression RPPA	RPPA_RBN_	DL	CNN_LSTM	macro	0.582	0.608	0.582	0.584	0.805
coad_k_fold	protein expression RPPA	RPPA_RBN_	DL		micro	0.703	0.703	0.703	0.703	0.851
coad_k_fold	protein expression RPPA	RPPA_RBN_	DL		weighted	0.703	0.692	0.703	0.69	0.713
coad_k_fold	protein expression RPPA	RPPA_RBN_	DL	RESNET101	macro	0.493	0.554	0.493	0.491	0.771
coad_k_fold	protein expression RPPA	RPPA_RBN_	DL		micro	0.64	0.64	0.64	0.64	0.82
coad_k_fold	protein expression RPPA	RPPA_RBN_	DL		weighted	0.64	0.651	0.64	0.625	0.673
coad_k_fold	protein expression RPPA	RPPA_RBN_	DL	DENSENET161	macro	0.356	0.337	0.356	0.311	0.675
coad_k_fold	protein expression RPPA	RPPA_RBN_	DL		micro	0.621	0.621	0.621	0.621	0.811
coad_k_fold	protein expression RPPA	RPPA_RBN_	DL		weighted	0.621	0.466	0.621	0.511	0.405
coad_k_fold	protein expression RPPA	RPPA_RBN_	DL	LSTM	macro	0.414	0.451	0.414	0.384	0.713
coad_k_fold	protein expression RPPA	RPPA_RBN_	DL		micro	0.677	0.677	0.677	0.677	0.838
coad_k_fold	protein expression RPPA	RPPA_RBN_	DL		weighted	0.677	0.554	0.677	0.575	0.461
coad_k_fold	protein expression RPPA	RPPA_RBN_	DL	RESNET50	macro	0.48	0.503	0.48	0.477	0.749
coad_k_fold	protein expression RPPA	RPPA_RBN_	DL		micro	0.615	0.615	0.615	0.615	0.808
coad_k_fold	protein expression RPPA	RPPA_RBN_	DL		weighted	0.615	0.607	0.615	0.601	0.63
coad_k_fold	protein expression RPPA	RPPA_RBN_	DL	RNN	macro	0.652	0.718	0.652	0.673	0.841
coad_k_fold	protein expression RPPA	RPPA_RBN_	DL		micro	0.771	0.771	0.771	0.771	0.885
coad_k_fold	protein expression RPPA	RPPA_RBN_	DL		weighted	0.771	0.764	0.771	0.759	0.751
coad_k_fold	protein expression RPPA	RPPA_RBN_	DL	CNN_GRU	macro	0.566	0.578	0.566	0.552	0.798
coad_k_fold	protein expression RPPA	RPPA_RBN_	DL		micro	0.724	0.724	0.724	0.724	0.862
coad_k_fold	protein expression RPPA	RPPA_RBN_	DL		weighted	0.724	0.666	0.724	0.679	0.669
coad_k_fold	protein expression RPPA	RPPA_RBN_	DL	RESNET18	macro	0.559	0.647	0.559	0.577	0.787
coad_k_fold	protein expression RPPA	RPPA_RBN_	DL		micro	0.703	0.703	0.703	0.703	0.852
coad_k_fold	protein expression RPPA	RPPA_RBN_	DL		weighted	0.703	0.696	0.703	0.683	0.657
coad_k_fold	protein expression RPPA	RPPA_RBN_	DL	NN	macro	0.357	0.315	0.357	0.302	0.679
coad_k_fold	protein expression RPPA	RPPA_RBN_	DL		micro	0.646	0.646	0.646	0.646	0.823
coad_k_fold	protein expression RPPA	RPPA_RBN_	DL		weighted	0.646	0.469	0.646	0.521	0.391
coad_k_fold	protein expression RPPA	RPPA_RBN_	DL	DENSENET201	macro	0.329	0.268	0.329	0.267	0.659
coad_k_fold	protein expression RPPA	RPPA_RBN_	DL		micro	0.495	0.495	0.495	0.495	0.747
coad_k_fold	protein expression RPPA	RPPA_RBN_	DL		weighted	0.495	0.415	0.495	0.42	0.482
coad_k_fold	protein expression RPPA	RPPA_RBN_	DL	GRU	macro	0.488	0.659	0.488	0.491	0.755
coad_k_fold	protein expression RPPA	RPPA_RBN_	DL		micro	0.698	0.698	0.698	0.698	0.849
coad_k_fold	protein expression RPPA	RPPA_RBN_	DL		weighted	0.698	0.685	0.698	0.639	0.568
coad_k_fold	protein expression RPPA	RPPA_RBN_	DL	DENSENET264	macro	0.37	0.301	0.37	0.306	0.68
coad_k_fold	protein expression RPPA	RPPA_RBN_	DL		micro	0.579	0.579	0.579	0.579	0.789
coad_k_fold	protein expression RPPA	RPPA_RBN_	DL		weighted	0.579	0.456	0.579	0.483	0.46
coad_k_fold	protein expression RPPA	RPPA_RBN_	DL	RESNET152	macro	0.388	0.395	0.388	0.36	0.72
coad_k_fold	protein expression RPPA	RPPA_RBN_	DL		micro	0.542	0.542	0.542	0.542	0.771
coad_k_fold	protein expression RPPA	RPPA_RBN_	DL		weighted	0.542	0.541	0.542	0.522	0.617
coad_k_fold	protein expression RPPA	RPPA_RBN_	DL	DENSENET169	macro	0.363	0.395	0.363	0.323	0.688
coad_k_fold	protein expression RPPA	RPPA_RBN_	DL		micro	0.626	0.626	0.626	0.626	0.813
coad_k_fold	protein expression RPPA	RPPA_RBN_	DL		weighted	0.626	0.515	0.626	0.525	0.438
coad_k_fold	protein expression RPPA	RPPA_RBN_	DL	CNN_RNN	macro	0.604	0.645	0.604	0.61	0.814
coad_k_fold	protein expression RPPA	RPPA_RBN_	DL		micro	0.718	0.718	0.718	0.718	0.859
coad_k_fold	protein expression RPPA	RPPA_RBN_	DL		weighted	0.718	0.716	0.718	0.706	0.724
coad_k_fold	protein expression RPPA	RPPA_RBN_	DL	DENSENET121	macro	0.366	0.365	0.366	0.327	0.686
coad_k_fold	protein expression RPPA	RPPA_RBN_	DL		micro	0.595	0.595	0.595	0.595	0.797
coad_k_fold	protein expression RPPA	RPPA_RBN_	DL		weighted	0.595	0.506	0.595	0.521	0.462
coad_k_fold	protein expression RPPA	RPPA_RBN_	ML	LIGHTGBM	macro	0.333	0.212	0.333	0.259	0.667
coad_k_fold	protein expression RPPA	RPPA_RBN_	ML		micro	0.635	0.635	0.635	0.635	0.818
coad_k_fold	protein expression RPPA	RPPA_RBN_	ML		weighted	0.635	0.404	0.635	0.494	0.365
coad_k_fold	protein expression RPPA	RPPA_RBN_	ML	GAUSSIAN_NB	macro	0.532	0.535	0.532	0.521	0.764
coad_k_fold	protein expression RPPA	RPPA_RBN_	ML		micro	0.61	0.61	0.61	0.61	0.805
coad_k_fold	protein expression RPPA	RPPA_RBN_	ML		weighted	0.61	0.633	0.61	0.611	0.683
coad_k_fold	protein expression RPPA	RPPA_RBN_	ML	K_NEIGHBORS	macro	0.405	0.567	0.405	0.393	0.707
coad_k_fold	protein expression RPPA	RPPA_RBN_	ML		micro	0.656	0.656	0.656	0.656	0.828
coad_k_fold	protein expression RPPA	RPPA_RBN_	ML		weighted	0.656	0.613	0.656	0.572	0.464
coad_k_fold	protein expression RPPA	RPPA_RBN_	ML	HISTGBOOST	macro	0.649	0.734	0.649	0.671	0.839
coad_k_fold	protein expression RPPA	RPPA_RBN_	ML		micro	0.766	0.766	0.766	0.766	0.883
coad_k_fold	protein expression RPPA	RPPA_RBN_	ML		weighted	0.766	0.776	0.766	0.756	0.751
coad_k_fold	protein expression RPPA	RPPA_RBN_	ML	CATBOOST	macro	0.342	0.28	0.342	0.275	0.671
coad_k_fold	protein expression RPPA	RPPA_RBN_	ML		micro	0.64	0.64	0.64	0.64	0.82
coad_k_fold	protein expression RPPA	RPPA_RBN_	ML		weighted	0.64	0.447	0.64	0.504	0.374
coad_k_fold	protein expression RPPA	RPPA_RBN_	ML	SVM_LINEAR	macro	0.552	0.655	0.552	0.56	0.794
coad_k_fold	protein expression RPPA	RPPA_RBN_	ML		micro	0.713	0.713	0.713	0.713	0.857
coad_k_fold	protein expression RPPA	RPPA_RBN_	ML		weighted	0.713	0.71	0.713	0.684	0.668
coad_k_fold	protein expression RPPA	RPPA_RBN_	ML	BERNOULLI_NB	macro	0.56	0.551	0.56	0.55	0.783
coad_k_fold	protein expression RPPA	RPPA_RBN_	ML		micro	0.63	0.63	0.63	0.63	0.815
coad_k_fold	protein expression RPPA	RPPA_RBN_	ML		weighted	0.63	0.655	0.63	0.637	0.719
coad_k_fold	protein expression RPPA	RPPA_RBN_	ML	LOGISTIC_REGRESSION	macro	0.661	0.691	0.661	0.669	0.849
coad_k_fold	protein expression RPPA	RPPA_RBN_	ML		micro	0.766	0.766	0.766	0.766	0.883
coad_k_fold	protein expression RPPA	RPPA_RBN_	ML		weighted	0.766	0.76	0.766	0.758	0.782
coad_k_fold	protein expression RPPA	RPPA_RBN_	ML	ADA_BOOST	macro	0.47	0.497	0.47	0.444	0.738
coad_k_fold	protein expression RPPA	RPPA_RBN_	ML		micro	0.713	0.713	0.713	0.713	0.856
coad_k_fold	protein expression RPPA	RPPA_RBN_	ML		weighted	0.713	0.59	0.713	0.617	0.501
coad_k_fold	protein expression RPPA	RPPA_RBN_	ML	GBOOST	macro	0.333	0.212	0.333	0.259	0.667
coad_k_fold	protein expression RPPA	RPPA_RBN_	ML		micro	0.635	0.635	0.635	0.635	0.818
coad_k_fold	protein expression RPPA	RPPA_RBN_	ML		weighted	0.635	0.404	0.635	0.494	0.365
coad_k_fold	protein expression RPPA	RPPA_RBN_	ML	XGBOOST	macro	0.648	0.706	0.648	0.664	0.834
coad_k_fold	protein expression RPPA	RPPA_RBN_	ML		micro	0.76	0.76	0.76	0.76	0.88
coad_k_fold	protein expression RPPA	RPPA_RBN_	ML		weighted	0.76	0.754	0.76	0.748	0.741
coad_k_fold	protein expression RPPA	RPPA_RBN_	ML	QUADRATIC_DISCRIMINANT	macro	0.345	0.331	0.345	0.322	0.694
coad_k_fold	protein expression RPPA	RPPA_RBN_	ML		micro	0.438	0.438	0.438	0.438	0.719
coad_k_fold	protein expression RPPA	RPPA_RBN_	ML		weighted	0.438	0.497	0.438	0.451	0.645
coad_k_fold	protein expression RPPA	RPPA_RBN_	ML	MLP	macro	0.656	0.722	0.656	0.678	0.836
coad_k_fold	protein expression RPPA	RPPA_RBN_	ML		micro	0.766	0.766	0.766	0.766	0.883
coad_k_fold	protein expression RPPA	RPPA_RBN_	ML		weighted	0.766	0.764	0.766	0.757	0.742
coad_k_fold	protein expression RPPA	RPPA_RBN_	ML	RANDOM_FOREST	macro	0.504	0.619	0.504	0.512	0.764
coad_k_fold	protein expression RPPA	RPPA_RBN_	ML		micro	0.718	0.718	0.718	0.718	0.859
coad_k_fold	protein expression RPPA	RPPA_RBN_	ML		weighted	0.718	0.666	0.718	0.656	0.573
coad_k_fold	protein expression RPPA	RPPA_RBN_	ML	DECISION_TREE	macro	0.566	0.575	0.566	0.566	0.803
coad_k_fold	protein expression RPPA	RPPA_RBN_	ML		micro	0.672	0.672	0.672	0.672	0.836
coad_k_fold	protein expression RPPA	RPPA_RBN_	ML		weighted	0.672	0.681	0.672	0.673	0.738
coad_k_fold	DNA methylation	HumanMethylation450	DL	CNN	macro	0.667	0.599	0.667	0.548	0.667
coad_k_fold	DNA methylation	HumanMethylation450	DL		micro	0.621	0.621	0.621	0.621	0.621
coad_k_fold	DNA methylation	HumanMethylation450	DL		weighted	0.621	0.631	0.621	0.549	0.712
coad_k_fold	DNA methylation	HumanMethylation450	DL	RESNET34	macro	0.65	0.613	0.65	0.578	0.65
coad_k_fold	DNA methylation	HumanMethylation450	DL		micro	0.707	0.707	0.707	0.707	0.707
coad_k_fold	DNA methylation	HumanMethylation450	DL		weighted	0.707	0.706	0.707	0.656	0.593
coad_k_fold	DNA methylation	HumanMethylation450	DL	CNN_LSTM	macro	0.5	0.355	0.5	0.415	0.5
coad_k_fold	DNA methylation	HumanMethylation450	DL		micro	0.711	0.711	0.711	0.711	0.711
coad_k_fold	DNA methylation	HumanMethylation450	DL		weighted	0.711	0.507	0.711	0.591	0.289
coad_k_fold	DNA methylation	HumanMethylation450	DL	RESNET101	macro	0.567	0.571	0.567	0.536	0.567
coad_k_fold	DNA methylation	HumanMethylation450	DL		micro	0.736	0.736	0.736	0.736	0.736
coad_k_fold	DNA methylation	HumanMethylation450	DL		weighted	0.736	0.654	0.736	0.667	0.398
coad_k_fold	DNA methylation	HumanMethylation450	DL	DENSENET161	macro	0.538	0.535	0.538	0.477	0.538
coad_k_fold	DNA methylation	HumanMethylation450	DL		micro	0.525	0.525	0.525	0.525	0.525
coad_k_fold	DNA methylation	HumanMethylation450	DL		weighted	0.525	0.63	0.525	0.513	0.552
coad_k_fold	DNA methylation	HumanMethylation450	DL	LSTM	macro	0.5	0.355	0.5	0.415	0.5
coad_k_fold	DNA methylation	HumanMethylation450	DL		micro	0.711	0.711	0.711	0.711	0.711
coad_k_fold	DNA methylation	HumanMethylation450	DL		weighted	0.711	0.507	0.711	0.591	0.289
coad_k_fold	DNA methylation	HumanMethylation450	DL	RESNET50	macro	0.53	0.439	0.53	0.473	0.53
coad_k_fold	DNA methylation	HumanMethylation450	DL		micro	0.664	0.664	0.664	0.664	0.664
coad_k_fold	DNA methylation	HumanMethylation450	DL		weighted	0.664	0.568	0.664	0.603	0.396
coad_k_fold	DNA methylation	HumanMethylation450	DL	RNN	macro	0.633	0.686	0.633	0.628	0.633
coad_k_fold	DNA methylation	HumanMethylation450	DL		micro	0.768	0.768	0.768	0.768	0.768
coad_k_fold	DNA methylation	HumanMethylation450	DL		weighted	0.768	0.716	0.768	0.719	0.499
coad_k_fold	DNA methylation	HumanMethylation450	DL	CNN_GRU	macro	0.5	0.355	0.5	0.415	0.5
coad_k_fold	DNA methylation	HumanMethylation450	DL		micro	0.711	0.711	0.711	0.711	0.711
coad_k_fold	DNA methylation	HumanMethylation450	DL		weighted	0.711	0.507	0.711	0.591	0.289
coad_k_fold	DNA methylation	HumanMethylation450	DL	RESNET18	macro	0.737	0.71	0.737	0.698	0.737
coad_k_fold	DNA methylation	HumanMethylation450	DL		micro	0.736	0.736	0.736	0.736	0.736
coad_k_fold	DNA methylation	HumanMethylation450	DL		weighted	0.736	0.789	0.736	0.741	0.738
coad_k_fold	DNA methylation	HumanMethylation450	DL	NN	macro	0.66	0.757	0.66	0.658	0.66
coad_k_fold	DNA methylation	HumanMethylation450	DL		micro	0.739	0.739	0.739	0.739	0.739
coad_k_fold	DNA methylation	HumanMethylation450	DL		weighted	0.739	0.79	0.739	0.727	0.581
coad_k_fold	DNA methylation	HumanMethylation450	DL	DENSENET201	macro	0.675	0.663	0.675	0.619	0.675
coad_k_fold	DNA methylation	HumanMethylation450	DL		micro	0.75	0.75	0.75	0.75	0.75
coad_k_fold	DNA methylation	HumanMethylation450	DL		weighted	0.75	0.729	0.75	0.688	0.6
coad_k_fold	DNA methylation	HumanMethylation450	DL	GRU	macro	0.583	0.574	0.583	0.554	0.583
coad_k_fold	DNA methylation	HumanMethylation450	DL		micro	0.739	0.739	0.739	0.739	0.739
coad_k_fold	DNA methylation	HumanMethylation450	DL		weighted	0.739	0.642	0.739	0.67	0.427
coad_k_fold	DNA methylation	HumanMethylation450	DL	DENSENET264	macro	0.525	0.517	0.525	0.439	0.525
coad_k_fold	DNA methylation	HumanMethylation450	DL		micro	0.575	0.575	0.575	0.575	0.575
coad_k_fold	DNA methylation	HumanMethylation450	DL		weighted	0.575	0.613	0.575	0.509	0.475
coad_k_fold	DNA methylation	HumanMethylation450	DL	RESNET152	macro	0.55	0.429	0.55	0.462	0.55
coad_k_fold	DNA methylation	HumanMethylation450	DL		micro	0.692	0.692	0.692	0.692	0.692
coad_k_fold	DNA methylation	HumanMethylation450	DL		weighted	0.692	0.559	0.692	0.593	0.408
coad_k_fold	DNA methylation	HumanMethylation450	DL	DENSENET169	macro	0.5	0.413	0.5	0.429	0.5
coad_k_fold	DNA methylation	HumanMethylation450	DL		micro	0.625	0.625	0.625	0.625	0.625
coad_k_fold	DNA methylation	HumanMethylation450	DL		weighted	0.625	0.492	0.625	0.537	0.375
coad_k_fold	DNA methylation	HumanMethylation450	DL	CNN_RNN	macro	0.5	0.355	0.5	0.415	0.5
coad_k_fold	DNA methylation	HumanMethylation450	DL		micro	0.711	0.711	0.711	0.711	0.711
coad_k_fold	DNA methylation	HumanMethylation450	DL		weighted	0.711	0.507	0.711	0.591	0.289
coad_k_fold	DNA methylation	HumanMethylation450	DL	DENSENET121	macro	0.682	0.68	0.682	0.637	0.682
coad_k_fold	DNA methylation	HumanMethylation450	DL		micro	0.725	0.725	0.725	0.725	0.725
coad_k_fold	DNA methylation	HumanMethylation450	DL		weighted	0.725	0.757	0.725	0.7	0.638
coad_k_fold	DNA methylation	HumanMethylation450	ML	LIGHTGBM	macro	0.5	0.355	0.5	0.415	0.5
coad_k_fold	DNA methylation	HumanMethylation450	ML		micro	0.711	0.711	0.711	0.711	0.711
coad_k_fold	DNA methylation	HumanMethylation450	ML		weighted	0.711	0.507	0.711	0.591	0.289
coad_k_fold	DNA methylation	HumanMethylation450	ML	GAUSSIAN_NB	macro	0.707	0.724	0.707	0.69	0.707
coad_k_fold	DNA methylation	HumanMethylation450	ML		micro	0.768	0.768	0.768	0.768	0.768
coad_k_fold	DNA methylation	HumanMethylation450	ML		weighted	0.768	0.778	0.768	0.753	0.645
coad_k_fold	DNA methylation	HumanMethylation450	ML	K_NEIGHBORS	macro	0.5	0.355	0.5	0.415	0.5
coad_k_fold	DNA methylation	HumanMethylation450	ML		micro	0.711	0.711	0.711	0.711	0.711
coad_k_fold	DNA methylation	HumanMethylation450	ML		weighted	0.711	0.507	0.711	0.591	0.289
coad_k_fold	DNA methylation	HumanMethylation450	ML	HISTGBOOST	macro	0.5	0.355	0.5	0.415	0.5
coad_k_fold	DNA methylation	HumanMethylation450	ML		micro	0.711	0.711	0.711	0.711	0.711
coad_k_fold	DNA methylation	HumanMethylation450	ML		weighted	0.711	0.507	0.711	0.591	0.289
coad_k_fold	DNA methylation	HumanMethylation450	ML	CATBOOST	macro	0.6	0.578	0.6	0.563	0.6
coad_k_fold	DNA methylation	HumanMethylation450	ML		micro	0.764	0.764	0.764	0.764	0.764
coad_k_fold	DNA methylation	HumanMethylation450	ML		weighted	0.764	0.647	0.764	0.684	0.436
coad_k_fold	DNA methylation	HumanMethylation450	ML	SVM_LINEAR	macro	0.76	0.836	0.76	0.762	0.76
coad_k_fold	DNA methylation	HumanMethylation450	ML		micro	0.814	0.814	0.814	0.814	0.814
coad_k_fold	DNA methylation	HumanMethylation450	ML		weighted	0.814	0.855	0.814	0.809	0.706
coad_k_fold	DNA methylation	HumanMethylation450	ML	BERNOULLI_NB	macro	0.5	0.355	0.5	0.415	0.5
coad_k_fold	DNA methylation	HumanMethylation450	ML		micro	0.711	0.711	0.711	0.711	0.711
coad_k_fold	DNA methylation	HumanMethylation450	ML		weighted	0.711	0.507	0.711	0.591	0.289
coad_k_fold	DNA methylation	HumanMethylation450	ML	LOGISTIC_REGRESSION	macro	0.74	0.826	0.74	0.735	0.74
coad_k_fold	DNA methylation	HumanMethylation450	ML		micro	0.786	0.786	0.786	0.786	0.786
coad_k_fold	DNA methylation	HumanMethylation450	ML		weighted	0.786	0.85	0.786	0.778	0.694
coad_k_fold	DNA methylation	HumanMethylation450	ML	ADA_BOOST	macro	0.577	0.548	0.577	0.524	0.577
coad_k_fold	DNA methylation	HumanMethylation450	ML		micro	0.629	0.629	0.629	0.629	0.629
coad_k_fold	DNA methylation	HumanMethylation450	ML		weighted	0.629	0.669	0.629	0.61	0.525
coad_k_fold	DNA methylation	HumanMethylation450	ML	GBOOST	macro	0.5	0.355	0.5	0.415	0.5
coad_k_fold	DNA methylation	HumanMethylation450	ML		micro	0.711	0.711	0.711	0.711	0.711
coad_k_fold	DNA methylation	HumanMethylation450	ML		weighted	0.711	0.507	0.711	0.591	0.289
coad_k_fold	DNA methylation	HumanMethylation450	ML	XGBOOST	macro	0.59	0.586	0.59	0.549	0.59
coad_k_fold	DNA methylation	HumanMethylation450	ML		micro	0.661	0.661	0.661	0.661	0.661
coad_k_fold	DNA methylation	HumanMethylation450	ML		weighted	0.661	0.67	0.661	0.628	0.519
coad_k_fold	DNA methylation	HumanMethylation450	ML	QUADRATIC_DISCRIMINANT	macro	0.403	0.408	0.403	0.399	0.403
coad_k_fold	DNA methylation	HumanMethylation450	ML		micro	0.504	0.504	0.504	0.504	0.504
coad_k_fold	DNA methylation	HumanMethylation450	ML		weighted	0.504	0.517	0.504	0.503	0.303
coad_k_fold	DNA methylation	HumanMethylation450	ML	MLP	macro	0.677	0.713	0.677	0.652	0.677
coad_k_fold	DNA methylation	HumanMethylation450	ML		micro	0.764	0.764	0.764	0.764	0.764
coad_k_fold	DNA methylation	HumanMethylation450	ML		weighted	0.764	0.774	0.764	0.733	0.589
coad_k_fold	DNA methylation	HumanMethylation450	ML	COMPLEMENT_NB	macro	0.55	0.467	0.55	0.489	0.55
coad_k_fold	DNA methylation	HumanMethylation450	ML		micro	0.739	0.739	0.739	0.739	0.739
coad_k_fold	DNA methylation	HumanMethylation450	ML		weighted	0.739	0.581	0.739	0.64	0.361
coad_k_fold	DNA methylation	HumanMethylation450	ML	RANDOM_FOREST	macro	0.61	0.545	0.61	0.547	0.61
coad_k_fold	DNA methylation	HumanMethylation450	ML		micro	0.736	0.736	0.736	0.736	0.736
coad_k_fold	DNA methylation	HumanMethylation450	ML		weighted	0.736	0.643	0.736	0.661	0.484
coad_k_fold	DNA methylation	HumanMethylation450	ML	DECISION_TREE	macro	0.573	0.538	0.573	0.538	0.573
coad_k_fold	DNA methylation	HumanMethylation450	ML		micro	0.661	0.661	0.661	0.661	0.661
coad_k_fold	DNA methylation	HumanMethylation450	ML		weighted	0.661	0.644	0.661	0.635	0.486
coad_k_fold	gene expression RNAseq	GAV2_	DL	DEEPGENE	macro	0.333	0.217	0.333	0.263	0.667
coad_k_fold	gene expression RNAseq	GAV2_	DL		micro	0.652	0.652	0.652	0.652	0.826
coad_k_fold	gene expression RNAseq	GAV2_	DL		weighted	0.652	0.426	0.652	0.515	0.348
coad_k_fold	gene expression RNAseq	GAV2_	DL	CNN	macro	0.333	0.217	0.333	0.263	0.667
coad_k_fold	gene expression RNAseq	GAV2_	DL		micro	0.652	0.652	0.652	0.652	0.826
coad_k_fold	gene expression RNAseq	GAV2_	DL		weighted	0.652	0.426	0.652	0.515	0.348
coad_k_fold	gene expression RNAseq	GAV2_	DL	RESNET34	macro	0.607	0.602	0.607	0.575	0.822
coad_k_fold	gene expression RNAseq	GAV2_	DL		micro	0.75	0.75	0.75	0.75	0.875
coad_k_fold	gene expression RNAseq	GAV2_	DL		weighted	0.75	0.699	0.75	0.704	0.717
coad_k_fold	gene expression RNAseq	GAV2_	DL	CNN_LSTM	macro	0.333	0.217	0.333	0.263	0.667
coad_k_fold	gene expression RNAseq	GAV2_	DL		micro	0.652	0.652	0.652	0.652	0.826
coad_k_fold	gene expression RNAseq	GAV2_	DL		weighted	0.652	0.426	0.652	0.515	0.348
coad_k_fold	gene expression RNAseq	GAV2_	DL	RESNET101	macro	0.405	0.359	0.405	0.342	0.698
coad_k_fold	gene expression RNAseq	GAV2_	DL		micro	0.598	0.598	0.598	0.598	0.799
coad_k_fold	gene expression RNAseq	GAV2_	DL		weighted	0.598	0.527	0.598	0.513	0.497
coad_k_fold	gene expression RNAseq	GAV2_	DL	DENSENET161	macro	0.322	0.238	0.322	0.253	0.685
coad_k_fold	gene expression RNAseq	GAV2_	DL		micro	0.5	0.5	0.5	0.5	0.75
coad_k_fold	gene expression RNAseq	GAV2_	DL		weighted	0.5	0.401	0.5	0.419	0.555
coad_k_fold	gene expression RNAseq	GAV2_	DL	LSTM	macro	0.333	0.217	0.333	0.263	0.667
coad_k_fold	gene expression RNAseq	GAV2_	DL		micro	0.652	0.652	0.652	0.652	0.826
coad_k_fold	gene expression RNAseq	GAV2_	DL		weighted	0.652	0.426	0.652	0.515	0.348
coad_k_fold	gene expression RNAseq	GAV2_	DL	RESNET50	macro	0.459	0.418	0.459	0.412	0.755
coad_k_fold	gene expression RNAseq	GAV2_	DL		micro	0.722	0.722	0.722	0.722	0.861
coad_k_fold	gene expression RNAseq	GAV2_	DL		weighted	0.722	0.596	0.722	0.631	0.544
coad_k_fold	gene expression RNAseq	GAV2_	DL	RNN	macro	0.333	0.217	0.333	0.263	0.667
coad_k_fold	gene expression RNAseq	GAV2_	DL		micro	0.652	0.652	0.652	0.652	0.826
coad_k_fold	gene expression RNAseq	GAV2_	DL		weighted	0.652	0.426	0.652	0.515	0.348
coad_k_fold	gene expression RNAseq	GAV2_	DL	CNN_GRU	macro	0.333	0.217	0.333	0.263	0.667
coad_k_fold	gene expression RNAseq	GAV2_	DL		micro	0.652	0.652	0.652	0.652	0.826
coad_k_fold	gene expression RNAseq	GAV2_	DL		weighted	0.652	0.426	0.652	0.515	0.348
coad_k_fold	gene expression RNAseq	GAV2_	DL	RESNET18	macro	0.591	0.554	0.591	0.538	0.819
coad_k_fold	gene expression RNAseq	GAV2_	DL		micro	0.721	0.721	0.721	0.721	0.86
coad_k_fold	gene expression RNAseq	GAV2_	DL		weighted	0.721	0.704	0.721	0.687	0.736
coad_k_fold	gene expression RNAseq	GAV2_	DL	NN	macro	0.691	0.73	0.691	0.678	0.865
coad_k_fold	gene expression RNAseq	GAV2_	DL		micro	0.819	0.819	0.819	0.819	0.91
coad_k_fold	gene expression RNAseq	GAV2_	DL		weighted	0.819	0.802	0.819	0.789	0.776
coad_k_fold	gene expression RNAseq	GAV2_	DL	DENSENET201	macro	0.326	0.217	0.326	0.261	0.661
coad_k_fold	gene expression RNAseq	GAV2_	DL		micro	0.643	0.643	0.643	0.643	0.821
coad_k_fold	gene expression RNAseq	GAV2_	DL		weighted	0.643	0.429	0.643	0.514	0.34
coad_k_fold	gene expression RNAseq	GAV2_	DL	GRU	macro	0.333	0.217	0.333	0.263	0.667
coad_k_fold	gene expression RNAseq	GAV2_	DL		micro	0.652	0.652	0.652	0.652	0.826
coad_k_fold	gene expression RNAseq	GAV2_	DL		weighted	0.652	0.426	0.652	0.515	0.348
coad_k_fold	gene expression RNAseq	GAV2_	DL	DENSENET264	macro	0.396	0.315	0.396	0.334	0.717
coad_k_fold	gene expression RNAseq	GAV2_	DL		micro	0.614	0.614	0.614	0.614	0.807
coad_k_fold	gene expression RNAseq	GAV2_	DL		weighted	0.614	0.518	0.614	0.543	0.537
coad_k_fold	gene expression RNAseq	GAV2_	DL	RESNET152	macro	0.426	0.357	0.426	0.337	0.728
coad_k_fold	gene expression RNAseq	GAV2_	DL		micro	0.6	0.6	0.6	0.6	0.8
coad_k_fold	gene expression RNAseq	GAV2_	DL		weighted	0.6	0.567	0.6	0.539	0.583
coad_k_fold	gene expression RNAseq	GAV2_	DL	DENSENET169	macro	0.326	0.212	0.326	0.257	0.661
coad_k_fold	gene expression RNAseq	GAV2_	DL		micro	0.629	0.629	0.629	0.629	0.814
coad_k_fold	gene expression RNAseq	GAV2_	DL		weighted	0.629	0.41	0.629	0.496	0.355
coad_k_fold	gene expression RNAseq	GAV2_	DL	CNN_RNN	macro	0.333	0.217	0.333	0.263	0.667
coad_k_fold	gene expression RNAseq	GAV2_	DL		micro	0.652	0.652	0.652	0.652	0.826
coad_k_fold	gene expression RNAseq	GAV2_	DL		weighted	0.652	0.426	0.652	0.515	0.348
coad_k_fold	gene expression RNAseq	GAV2_	DL	DENSENET121	macro	0.304	0.206	0.304	0.245	0.644
coad_k_fold	gene expression RNAseq	GAV2_	DL		micro	0.586	0.586	0.586	0.586	0.793
coad_k_fold	gene expression RNAseq	GAV2_	DL		weighted	0.586	0.397	0.586	0.473	0.346
coad_k_fold	gene expression RNAseq	GAV2_	ML	LIGHTGBM	macro	0.333	0.217	0.333	0.263	0.667
coad_k_fold	gene expression RNAseq	GAV2_	ML		micro	0.652	0.652	0.652	0.652	0.826
coad_k_fold	gene expression RNAseq	GAV2_	ML		weighted	0.652	0.426	0.652	0.515	0.348
coad_k_fold	gene expression RNAseq	GAV2_	ML	GAUSSIAN_NB	macro	0.333	0.217	0.333	0.263	0.667
coad_k_fold	gene expression RNAseq	GAV2_	ML		micro	0.652	0.652	0.652	0.652	0.826
coad_k_fold	gene expression RNAseq	GAV2_	ML		weighted	0.652	0.426	0.652	0.515	0.348
coad_k_fold	gene expression RNAseq	GAV2_	ML	K_NEIGHBORS	macro	0.367	0.287	0.367	0.31	0.68
coad_k_fold	gene expression RNAseq	GAV2_	ML		micro	0.666	0.666	0.666	0.666	0.833
coad_k_fold	gene expression RNAseq	GAV2_	ML		weighted	0.666	0.459	0.666	0.537	0.374
coad_k_fold	gene expression RNAseq	GAV2_	ML	HISTGBOOST	macro	0.815	0.89	0.815	0.821	0.916
coad_k_fold	gene expression RNAseq	GAV2_	ML		micro	0.887	0.887	0.887	0.887	0.943
coad_k_fold	gene expression RNAseq	GAV2_	ML		weighted	0.887	0.897	0.887	0.874	0.862
coad_k_fold	gene expression RNAseq	GAV2_	ML	CATBOOST	macro	0.333	0.217	0.333	0.263	0.667
coad_k_fold	gene expression RNAseq	GAV2_	ML		micro	0.652	0.652	0.652	0.652	0.826
coad_k_fold	gene expression RNAseq	GAV2_	ML		weighted	0.652	0.426	0.652	0.515	0.348
coad_k_fold	gene expression RNAseq	GAV2_	ML	SVM_LINEAR	macro	0.801	0.871	0.801	0.807	0.905
coad_k_fold	gene expression RNAseq	GAV2_	ML		micro	0.861	0.861	0.861	0.861	0.93
coad_k_fold	gene expression RNAseq	GAV2_	ML		weighted	0.861	0.879	0.861	0.854	0.853
coad_k_fold	gene expression RNAseq	GAV2_	ML	BERNOULLI_NB	macro	0.333	0.217	0.333	0.263	0.667
coad_k_fold	gene expression RNAseq	GAV2_	ML		micro	0.652	0.652	0.652	0.652	0.826
coad_k_fold	gene expression RNAseq	GAV2_	ML		weighted	0.652	0.426	0.652	0.515	0.348
coad_k_fold	gene expression RNAseq	GAV2_	ML	LOGISTIC_REGRESSION	macro	0.738	0.885	0.738	0.764	0.877
coad_k_fold	gene expression RNAseq	GAV2_	ML		micro	0.846	0.846	0.846	0.846	0.923
coad_k_fold	gene expression RNAseq	GAV2_	ML		weighted	0.846	0.874	0.846	0.829	0.784
coad_k_fold	gene expression RNAseq	GAV2_	ML	ADA_BOOST	macro	0.581	0.649	0.581	0.579	0.781
coad_k_fold	gene expression RNAseq	GAV2_	ML		micro	0.76	0.76	0.76	0.76	0.88
coad_k_fold	gene expression RNAseq	GAV2_	ML		weighted	0.76	0.694	0.76	0.698	0.582
coad_k_fold	gene expression RNAseq	GAV2_	ML	GBOOST	macro	0.333	0.217	0.333	0.263	0.667
coad_k_fold	gene expression RNAseq	GAV2_	ML		micro	0.652	0.652	0.652	0.652	0.826
coad_k_fold	gene expression RNAseq	GAV2_	ML		weighted	0.652	0.426	0.652	0.515	0.348
coad_k_fold	gene expression RNAseq	GAV2_	ML	XGBOOST	macro	0.679	0.677	0.679	0.664	0.843
coad_k_fold	gene expression RNAseq	GAV2_	ML		micro	0.804	0.804	0.804	0.804	0.902
coad_k_fold	gene expression RNAseq	GAV2_	ML		weighted	0.804	0.749	0.804	0.765	0.726
coad_k_fold	gene expression RNAseq	GAV2_	ML	QUADRATIC_DISCRIMINANT	macro	0.374	0.355	0.374	0.359	0.67
coad_k_fold	gene expression RNAseq	GAV2_	ML		micro	0.487	0.487	0.487	0.487	0.743
coad_k_fold	gene expression RNAseq	GAV2_	ML		weighted	0.487	0.487	0.487	0.482	0.523
coad_k_fold	gene expression RNAseq	GAV2_	ML	MLP	macro	0.607	0.575	0.607	0.555	0.822
coad_k_fold	gene expression RNAseq	GAV2_	ML		micro	0.751	0.751	0.751	0.751	0.876
coad_k_fold	gene expression RNAseq	GAV2_	ML		weighted	0.751	0.695	0.751	0.698	0.715
coad_k_fold	gene expression RNAseq	GAV2_	ML	COMPLEMENT_NB	macro	0.713	0.834	0.713	0.726	0.873
coad_k_fold	gene expression RNAseq	GAV2_	ML		micro	0.819	0.819	0.819	0.819	0.91
coad_k_fold	gene expression RNAseq	GAV2_	ML		weighted	0.819	0.846	0.819	0.804	0.799
coad_k_fold	gene expression RNAseq	GAV2_	ML	RANDOM_FOREST	macro	0.6	0.759	0.6	0.624	0.808
coad_k_fold	gene expression RNAseq	GAV2_	ML		micro	0.79	0.79	0.79	0.79	0.895
coad_k_fold	gene expression RNAseq	GAV2_	ML		weighted	0.79	0.769	0.79	0.741	0.634
coad_k_fold	gene expression RNAseq	GAV2_	ML	DECISION_TREE	macro	0.63	0.578	0.63	0.576	0.868
coad_k_fold	gene expression RNAseq	GAV2_	ML		micro	0.75	0.75	0.75	0.75	0.875
coad_k_fold	gene expression RNAseq	GAV2_	ML		weighted	0.75	0.759	0.75	0.737	0.855
coad_k_fold	exon expression RNAseq	GAV2_exon_	DL	CNN	macro	0.333	0.188	0.333	0.23	0.682
coad_k_fold	exon expression RNAseq	GAV2_exon_	DL		micro	0.543	0.543	0.543	0.543	0.771
coad_k_fold	exon expression RNAseq	GAV2_exon_	DL		weighted	0.543	0.348	0.543	0.419	0.502
coad_k_fold	exon expression RNAseq	GAV2_exon_	DL	RESNET34	macro	0.465	0.416	0.465	0.411	0.755
coad_k_fold	exon expression RNAseq	GAV2_exon_	DL		micro	0.643	0.643	0.643	0.643	0.821
coad_k_fold	exon expression RNAseq	GAV2_exon_	DL		weighted	0.643	0.588	0.643	0.592	0.623
coad_k_fold	exon expression RNAseq	GAV2_exon_	DL	CNN_LSTM	macro	0.333	0.219	0.333	0.264	0.667
coad_k_fold	exon expression RNAseq	GAV2_exon_	DL		micro	0.657	0.657	0.657	0.657	0.829
coad_k_fold	exon expression RNAseq	GAV2_exon_	DL		weighted	0.657	0.433	0.657	0.522	0.343
coad_k_fold	exon expression RNAseq	GAV2_exon_	DL	RESNET101	macro	0.389	0.288	0.389	0.273	0.693
coad_k_fold	exon expression RNAseq	GAV2_exon_	DL		micro	0.471	0.471	0.471	0.471	0.736
coad_k_fold	exon expression RNAseq	GAV2_exon_	DL		weighted	0.471	0.341	0.471	0.366	0.609
coad_k_fold	exon expression RNAseq	GAV2_exon_	DL	DENSENET161	macro	0.314	0.261	0.314	0.239	0.673
coad_k_fold	exon expression RNAseq	GAV2_exon_	DL		micro	0.529	0.529	0.529	0.529	0.764
coad_k_fold	exon expression RNAseq	GAV2_exon_	DL		weighted	0.529	0.494	0.529	0.439	0.49
coad_k_fold	exon expression RNAseq	GAV2_exon_	DL	LSTM	macro	0.333	0.219	0.333	0.264	0.667
coad_k_fold	exon expression RNAseq	GAV2_exon_	DL		micro	0.657	0.657	0.657	0.657	0.829
coad_k_fold	exon expression RNAseq	GAV2_exon_	DL		weighted	0.657	0.433	0.657	0.522	0.343
coad_k_fold	exon expression RNAseq	GAV2_exon_	DL	RESNET50	macro	0.363	0.243	0.363	0.272	0.704
coad_k_fold	exon expression RNAseq	GAV2_exon_	DL		micro	0.5	0.5	0.5	0.5	0.75
coad_k_fold	exon expression RNAseq	GAV2_exon_	DL		weighted	0.5	0.389	0.5	0.425	0.613
coad_k_fold	exon expression RNAseq	GAV2_exon_	DL	RNN	macro	0.333	0.214	0.333	0.261	0.667
coad_k_fold	exon expression RNAseq	GAV2_exon_	DL		micro	0.643	0.643	0.643	0.643	0.821
coad_k_fold	exon expression RNAseq	GAV2_exon_	DL		weighted	0.643	0.413	0.643	0.503	0.357
coad_k_fold	exon expression RNAseq	GAV2_exon_	DL	CNN_GRU	macro	0.333	0.219	0.333	0.264	0.667
coad_k_fold	exon expression RNAseq	GAV2_exon_	DL		micro	0.657	0.657	0.657	0.657	0.829
coad_k_fold	exon expression RNAseq	GAV2_exon_	DL		weighted	0.657	0.433	0.657	0.522	0.343
coad_k_fold	exon expression RNAseq	GAV2_exon_	DL	RESNET18	macro	0.452	0.447	0.452	0.41	0.736
coad_k_fold	exon expression RNAseq	GAV2_exon_	DL		micro	0.629	0.629	0.629	0.629	0.814
coad_k_fold	exon expression RNAseq	GAV2_exon_	DL		weighted	0.629	0.545	0.629	0.558	0.578
coad_k_fold	exon expression RNAseq	GAV2_exon_	DL	NN	macro	0.661	0.606	0.661	0.603	0.826
coad_k_fold	exon expression RNAseq	GAV2_exon_	DL		micro	0.714	0.714	0.714	0.714	0.857
coad_k_fold	exon expression RNAseq	GAV2_exon_	DL		weighted	0.714	0.725	0.714	0.699	0.763
coad_k_fold	exon expression RNAseq	GAV2_exon_	DL	DENSENET201	macro	0.281	0.208	0.281	0.235	0.642
coad_k_fold	exon expression RNAseq	GAV2_exon_	DL		micro	0.571	0.571	0.571	0.571	0.786
coad_k_fold	exon expression RNAseq	GAV2_exon_	DL		weighted	0.571	0.421	0.571	0.476	0.356
coad_k_fold	exon expression RNAseq	GAV2_exon_	DL	GRU	macro	0.333	0.219	0.333	0.264	0.667
coad_k_fold	exon expression RNAseq	GAV2_exon_	DL		micro	0.657	0.657	0.657	0.657	0.829
coad_k_fold	exon expression RNAseq	GAV2_exon_	DL		weighted	0.657	0.433	0.657	0.522	0.343
coad_k_fold	exon expression RNAseq	GAV2_exon_	DL	DENSENET264	macro	0.319	0.215	0.319	0.257	0.655
coad_k_fold	exon expression RNAseq	GAV2_exon_	DL		micro	0.629	0.629	0.629	0.629	0.814
coad_k_fold	exon expression RNAseq	GAV2_exon_	DL		weighted	0.629	0.426	0.629	0.507	0.335
coad_k_fold	exon expression RNAseq	GAV2_exon_	DL	RESNET152	macro	0.347	0.149	0.347	0.143	0.678
coad_k_fold	exon expression RNAseq	GAV2_exon_	DL		micro	0.271	0.271	0.271	0.271	0.636
coad_k_fold	exon expression RNAseq	GAV2_exon_	DL		weighted	0.271	0.243	0.271	0.178	0.762
coad_k_fold	exon expression RNAseq	GAV2_exon_	DL	DENSENET169	macro	0.332	0.245	0.332	0.242	0.666
coad_k_fold	exon expression RNAseq	GAV2_exon_	DL		micro	0.543	0.543	0.543	0.543	0.771
coad_k_fold	exon expression RNAseq	GAV2_exon_	DL		weighted	0.543	0.471	0.543	0.443	0.454
coad_k_fold	exon expression RNAseq	GAV2_exon_	DL	CNN_RNN	macro	0.333	0.219	0.333	0.264	0.667
coad_k_fold	exon expression RNAseq	GAV2_exon_	DL		micro	0.657	0.657	0.657	0.657	0.829
coad_k_fold	exon expression RNAseq	GAV2_exon_	DL		weighted	0.657	0.433	0.657	0.522	0.343
coad_k_fold	exon expression RNAseq	GAV2_exon_	DL	DENSENET121	macro	0.333	0.214	0.333	0.261	0.667
coad_k_fold	exon expression RNAseq	GAV2_exon_	DL		micro	0.643	0.643	0.643	0.643	0.821
coad_k_fold	exon expression RNAseq	GAV2_exon_	DL		weighted	0.643	0.413	0.643	0.503	0.357
coad_k_fold	exon expression RNAseq	GAV2_exon_	ML	LIGHTGBM	macro	0.33	0.22	0.33	0.26	0.67
coad_k_fold	exon expression RNAseq	GAV2_exon_	ML		micro	0.65	0.65	0.65	0.65	0.83
coad_k_fold	exon expression RNAseq	GAV2_exon_	ML		weighted	0.65	0.43	0.65	0.52	0.35
coad_k_fold	exon expression RNAseq	GAV2_exon_	ML	GAUSSIAN_NB	macro	0.333	0.217	0.333	0.263	0.667
coad_k_fold	exon expression RNAseq	GAV2_exon_	ML		micro	0.652	0.652	0.652	0.652	0.826
coad_k_fold	exon expression RNAseq	GAV2_exon_	ML		weighted	0.652	0.426	0.652	0.515	0.348
coad_k_fold	exon expression RNAseq	GAV2_exon_	ML	K_NEIGHBORS	macro	0.39	0.36	0.39	0.35	0.69
coad_k_fold	exon expression RNAseq	GAV2_exon_	ML		micro	0.68	0.68	0.68	0.68	0.84
coad_k_fold	exon expression RNAseq	GAV2_exon_	ML		weighted	0.68	0.51	0.68	0.56	0.4
coad_k_fold	exon expression RNAseq	GAV2_exon_	ML	HISTGBOOST	macro	0.67	0.69	0.67	0.66	0.85
coad_k_fold	exon expression RNAseq	GAV2_exon_	ML		micro	0.79	0.79	0.79	0.79	0.89
coad_k_fold	exon expression RNAseq	GAV2_exon_	ML		weighted	0.79	0.76	0.79	0.76	0.75
coad_k_fold	exon expression RNAseq	GAV2_exon_	ML	CATBOOST	macro	0.333	0.217	0.333	0.263	0.667
coad_k_fold	exon expression RNAseq	GAV2_exon_	ML		micro	0.652	0.652	0.652	0.652	0.826
coad_k_fold	exon expression RNAseq	GAV2_exon_	ML		weighted	0.652	0.426	0.652	0.515	0.348
coad_k_fold	exon expression RNAseq	GAV2_exon_	ML	SVM_LINEAR	macro	0.69	0.79	0.69	0.7	0.85
coad_k_fold	exon expression RNAseq	GAV2_exon_	ML		micro	0.8	0.8	0.8	0.8	0.9
coad_k_fold	exon expression RNAseq	GAV2_exon_	ML		weighted	0.8	0.81	0.8	0.78	0.75
coad_k_fold	exon expression RNAseq	GAV2_exon_	ML	BERNOULLI_NB	macro	0.319	0.213	0.319	0.255	0.655
coad_k_fold	exon expression RNAseq	GAV2_exon_	ML		micro	0.624	0.624	0.624	0.624	0.812
coad_k_fold	exon expression RNAseq	GAV2_exon_	ML		weighted	0.624	0.418	0.624	0.5	0.34
coad_k_fold	exon expression RNAseq	GAV2_exon_	ML	LOGISTIC_REGRESSION	macro	0.65	0.78	0.65	0.68	0.83
coad_k_fold	exon expression RNAseq	GAV2_exon_	ML		micro	0.78	0.78	0.78	0.78	0.89
coad_k_fold	exon expression RNAseq	GAV2_exon_	ML		weighted	0.78	0.8	0.78	0.76	0.72
coad_k_fold	exon expression RNAseq	GAV2_exon_	ML	ADA_BOOST	macro	0.498	0.534	0.498	0.498	0.759
coad_k_fold	exon expression RNAseq	GAV2_exon_	ML		micro	0.693	0.693	0.693	0.693	0.847
coad_k_fold	exon expression RNAseq	GAV2_exon_	ML		weighted	0.693	0.632	0.693	0.65	0.584
coad_k_fold	exon expression RNAseq	GAV2_exon_	ML	GBOOST	macro	0.33	0.22	0.33	0.26	0.67
coad_k_fold	exon expression RNAseq	GAV2_exon_	ML		micro	0.65	0.65	0.65	0.65	0.83
coad_k_fold	exon expression RNAseq	GAV2_exon_	ML		weighted	0.65	0.43	0.65	0.52	0.35
coad_k_fold	exon expression RNAseq	GAV2_exon_	ML	XGBOOST	macro	0.53	0.62	0.53	0.54	0.78
coad_k_fold	exon expression RNAseq	GAV2_exon_	ML		micro	0.73	0.73	0.73	0.73	0.87
coad_k_fold	exon expression RNAseq	GAV2_exon_	ML		weighted	0.73	0.69	0.73	0.69	0.59
coad_k_fold	exon expression RNAseq	GAV2_exon_	ML	QUADRATIC_DISCRIMINANT	macro	0.41	0.46	0.41	0.39	0.69
coad_k_fold	exon expression RNAseq	GAV2_exon_	ML		micro	0.45	0.45	0.45	0.45	0.72
coad_k_fold	exon expression RNAseq	GAV2_exon_	ML		weighted	0.45	0.56	0.45	0.47	0.63
coad_k_fold	exon expression RNAseq	GAV2_exon_	ML	MLP	macro	0.5	0.39	0.5	0.41	0.75
coad_k_fold	exon expression RNAseq	GAV2_exon_	ML		micro	0.59	0.59	0.59	0.59	0.79
coad_k_fold	exon expression RNAseq	GAV2_exon_	ML		weighted	0.59	0.49	0.59	0.51	0.68
coad_k_fold	exon expression RNAseq	GAV2_exon_	ML	COMPLEMENT_NB	macro	0.623	0.588	0.623	0.585	0.833
coad_k_fold	exon expression RNAseq	GAV2_exon_	ML		micro	0.776	0.776	0.776	0.776	0.888
coad_k_fold	exon expression RNAseq	GAV2_exon_	ML		weighted	0.776	0.708	0.776	0.728	0.722
coad_k_fold	exon expression RNAseq	GAV2_exon_	ML	RANDOM_FOREST	macro	0.46	0.44	0.46	0.43	0.74
coad_k_fold	exon expression RNAseq	GAV2_exon_	ML		micro	0.72	0.72	0.72	0.72	0.86
coad_k_fold	exon expression RNAseq	GAV2_exon_	ML		weighted	0.72	0.57	0.72	0.63	0.5
coad_k_fold	exon expression RNAseq	GAV2_exon_	ML	DECISION_TREE	macro	0.513	0.526	0.513	0.504	0.77
coad_k_fold	exon expression RNAseq	GAV2_exon_	ML		micro	0.664	0.664	0.664	0.664	0.832
coad_k_fold	exon expression RNAseq	GAV2_exon_	ML		weighted	0.664	0.642	0.664	0.642	0.646
lusc_k_fold	copy number (gene-level)	Gistic2_all_data_by_genes	DL	DEEPGENE	macro	0.344	0.341	0.344	0.317	0.788
lusc_k_fold	copy number (gene-level)	Gistic2_all_data_by_genes	DL		micro	0.38	0.38	0.38	0.38	0.793
lusc_k_fold	copy number (gene-level)	Gistic2_all_data_by_genes	DL		weighted	0.38	0.386	0.38	0.355	0.774
lusc_k_fold	copy number (gene-level)	Gistic2_all_data_by_genes	DL	CNN	macro	0.55	0.58	0.55	0.54	0.86
lusc_k_fold	copy number (gene-level)	Gistic2_all_data_by_genes	DL		micro	0.61	0.61	0.61	0.61	0.87
lusc_k_fold	copy number (gene-level)	Gistic2_all_data_by_genes	DL		weighted	0.61	0.61	0.61	0.59	0.85
lusc_k_fold	copy number (gene-level)	Gistic2_all_data_by_genes	DL	RESNET34	macro	0.36	0.39	0.36	0.34	0.79
lusc_k_fold	copy number (gene-level)	Gistic2_all_data_by_genes	DL		micro	0.39	0.39	0.39	0.39	0.8
lusc_k_fold	copy number (gene-level)	Gistic2_all_data_by_genes	DL		weighted	0.39	0.39	0.39	0.36	0.75
lusc_k_fold	copy number (gene-level)	Gistic2_all_data_by_genes	DL	CNN_LSTM	macro	0.47	0.45	0.47	0.44	0.84
lusc_k_fold	copy number (gene-level)	Gistic2_all_data_by_genes	DL		micro	0.54	0.54	0.54	0.54	0.85
lusc_k_fold	copy number (gene-level)	Gistic2_all_data_by_genes	DL		weighted	0.54	0.51	0.54	0.51	0.83
lusc_k_fold	copy number (gene-level)	Gistic2_all_data_by_genes	DL	RESNET101	macro	0.34	0.26	0.34	0.27	0.78
lusc_k_fold	copy number (gene-level)	Gistic2_all_data_by_genes	DL		micro	0.34	0.34	0.34	0.34	0.78
lusc_k_fold	copy number (gene-level)	Gistic2_all_data_by_genes	DL		weighted	0.34	0.26	0.34	0.27	0.76
lusc_k_fold	copy number (gene-level)	Gistic2_all_data_by_genes	DL	DENSENET161	macro	0.25	0.16	0.25	0.18	0.75
lusc_k_fold	copy number (gene-level)	Gistic2_all_data_by_genes	DL		micro	0.27	0.27	0.27	0.27	0.76
lusc_k_fold	copy number (gene-level)	Gistic2_all_data_by_genes	DL		weighted	0.27	0.17	0.27	0.19	0.73
lusc_k_fold	copy number (gene-level)	Gistic2_all_data_by_genes	DL	LSTM	macro	0.5	0.5	0.5	0.47	0.86
lusc_k_fold	copy number (gene-level)	Gistic2_all_data_by_genes	DL		micro	0.59	0.59	0.59	0.59	0.86
lusc_k_fold	copy number (gene-level)	Gistic2_all_data_by_genes	DL		weighted	0.59	0.55	0.59	0.55	0.83
lusc_k_fold	copy number (gene-level)	Gistic2_all_data_by_genes	DL	RESNET50	macro	0.34	0.32	0.34	0.31	0.78
lusc_k_fold	copy number (gene-level)	Gistic2_all_data_by_genes	DL		micro	0.36	0.36	0.36	0.36	0.79
lusc_k_fold	copy number (gene-level)	Gistic2_all_data_by_genes	DL		weighted	0.36	0.35	0.36	0.33	0.76
lusc_k_fold	copy number (gene-level)	Gistic2_all_data_by_genes	DL	RNN	macro	0.5	0.51	0.5	0.48	0.85
lusc_k_fold	copy number (gene-level)	Gistic2_all_data_by_genes	DL		micro	0.58	0.58	0.58	0.58	0.86
lusc_k_fold	copy number (gene-level)	Gistic2_all_data_by_genes	DL		weighted	0.58	0.55	0.58	0.55	0.83
lusc_k_fold	copy number (gene-level)	Gistic2_all_data_by_genes	DL	CNN_GRU	macro	0.5	0.5	0.5	0.48	0.85
lusc_k_fold	copy number (gene-level)	Gistic2_all_data_by_genes	DL		micro	0.58	0.58	0.58	0.58	0.86
lusc_k_fold	copy number (gene-level)	Gistic2_all_data_by_genes	DL		weighted	0.58	0.55	0.58	0.55	0.83
lusc_k_fold	copy number (gene-level)	Gistic2_all_data_by_genes	DL	RESNET18	macro	0.37	0.4	0.37	0.34	0.79
lusc_k_fold	copy number (gene-level)	Gistic2_all_data_by_genes	DL		micro	0.38	0.38	0.38	0.38	0.79
lusc_k_fold	copy number (gene-level)	Gistic2_all_data_by_genes	DL		weighted	0.38	0.4	0.38	0.34	0.76
lusc_k_fold	copy number (gene-level)	Gistic2_all_data_by_genes	DL	NN	macro	0.58	0.68	0.58	0.59	0.87
lusc_k_fold	copy number (gene-level)	Gistic2_all_data_by_genes	DL		micro	0.63	0.63	0.63	0.63	0.88
lusc_k_fold	copy number (gene-level)	Gistic2_all_data_by_genes	DL		weighted	0.63	0.68	0.63	0.63	0.86
lusc_k_fold	copy number (gene-level)	Gistic2_all_data_by_genes	DL	DENSENET201	macro	0.25	0.25	0.25	0.18	0.75
lusc_k_fold	copy number (gene-level)	Gistic2_all_data_by_genes	DL		micro	0.31	0.31	0.31	0.31	0.77
lusc_k_fold	copy number (gene-level)	Gistic2_all_data_by_genes	DL		weighted	0.31	0.25	0.31	0.21	0.69
lusc_k_fold	copy number (gene-level)	Gistic2_all_data_by_genes	DL	GRU	macro	0.55	0.53	0.55	0.53	0.87
lusc_k_fold	copy number (gene-level)	Gistic2_all_data_by_genes	DL		micro	0.63	0.63	0.63	0.63	0.88
lusc_k_fold	copy number (gene-level)	Gistic2_all_data_by_genes	DL		weighted	0.63	0.59	0.63	0.6	0.85
lusc_k_fold	copy number (gene-level)	Gistic2_all_data_by_genes	DL	DENSENET264	macro	0.26	0.16	0.26	0.16	0.75
lusc_k_fold	copy number (gene-level)	Gistic2_all_data_by_genes	DL		micro	0.26	0.26	0.26	0.26	0.75
lusc_k_fold	copy number (gene-level)	Gistic2_all_data_by_genes	DL		weighted	0.26	0.18	0.26	0.17	0.75
lusc_k_fold	copy number (gene-level)	Gistic2_all_data_by_genes	DL	RESNET152	macro	0.34	0.31	0.34	0.29	0.78
lusc_k_fold	copy number (gene-level)	Gistic2_all_data_by_genes	DL		micro	0.41	0.41	0.41	0.41	0.8
lusc_k_fold	copy number (gene-level)	Gistic2_all_data_by_genes	DL		weighted	0.41	0.34	0.41	0.34	0.73
lusc_k_fold	copy number (gene-level)	Gistic2_all_data_by_genes	DL	DENSENET169	macro	0.3	0.34	0.3	0.26	0.77
lusc_k_fold	copy number (gene-level)	Gistic2_all_data_by_genes	DL		micro	0.34	0.34	0.34	0.34	0.78
lusc_k_fold	copy number (gene-level)	Gistic2_all_data_by_genes	DL		weighted	0.34	0.36	0.34	0.29	0.72
lusc_k_fold	copy number (gene-level)	Gistic2_all_data_by_genes	DL	CNN_RNN	macro	0.54	0.55	0.54	0.53	0.86
lusc_k_fold	copy number (gene-level)	Gistic2_all_data_by_genes	DL		micro	0.59	0.59	0.59	0.59	0.86
lusc_k_fold	copy number (gene-level)	Gistic2_all_data_by_genes	DL		weighted	0.59	0.59	0.59	0.58	0.85
lusc_k_fold	copy number (gene-level)	Gistic2_all_data_by_genes	DL	DENSENET121	macro	0.28	0.21	0.28	0.21	0.76
lusc_k_fold	copy number (gene-level)	Gistic2_all_data_by_genes	DL		micro	0.38	0.38	0.38	0.38	0.79
lusc_k_fold	copy number (gene-level)	Gistic2_all_data_by_genes	DL		weighted	0.38	0.25	0.38	0.27	0.68
lusc_k_fold	copy number (gene-level)	Gistic2_all_data_by_genes	ML	LIGHTGBM	macro	0.25	0.09	0.25	0.13	0.75
lusc_k_fold	copy number (gene-level)	Gistic2_all_data_by_genes	ML		micro	0.37	0.37	0.37	0.37	0.79
lusc_k_fold	copy number (gene-level)	Gistic2_all_data_by_genes	ML		weighted	0.37	0.13	0.37	0.2	0.63
lusc_k_fold	copy number (gene-level)	Gistic2_all_data_by_genes	ML	GAUSSIAN_NB	macro	0.56	0.55	0.56	0.54	0.86
lusc_k_fold	copy number (gene-level)	Gistic2_all_data_by_genes	ML		micro	0.56	0.56	0.56	0.56	0.85
lusc_k_fold	copy number (gene-level)	Gistic2_all_data_by_genes	ML		weighted	0.56	0.59	0.56	0.56	0.86
lusc_k_fold	copy number (gene-level)	Gistic2_all_data_by_genes	ML	K_NEIGHBORS	macro	0.48	0.42	0.48	0.42	0.84
lusc_k_fold	copy number (gene-level)	Gistic2_all_data_by_genes	ML		micro	0.53	0.53	0.53	0.53	0.84
lusc_k_fold	copy number (gene-level)	Gistic2_all_data_by_genes	ML		weighted	0.53	0.5	0.53	0.48	0.83
lusc_k_fold	copy number (gene-level)	Gistic2_all_data_by_genes	ML	HISTGBOOST	macro	0.55	0.55	0.55	0.55	0.86
lusc_k_fold	copy number (gene-level)	Gistic2_all_data_by_genes	ML		micro	0.6	0.6	0.6	0.6	0.87
lusc_k_fold	copy number (gene-level)	Gistic2_all_data_by_genes	ML		weighted	0.6	0.59	0.6	0.59	0.85
lusc_k_fold	copy number (gene-level)	Gistic2_all_data_by_genes	ML	CATBOOST	macro	0.52	0.49	0.52	0.48	0.86
lusc_k_fold	copy number (gene-level)	Gistic2_all_data_by_genes	ML		micro	0.62	0.62	0.62	0.62	0.87
lusc_k_fold	copy number (gene-level)	Gistic2_all_data_by_genes	ML		weighted	0.62	0.55	0.62	0.55	0.82
lusc_k_fold	copy number (gene-level)	Gistic2_all_data_by_genes	ML	SVM_LINEAR	macro	0.54	0.57	0.54	0.54	0.86
lusc_k_fold	copy number (gene-level)	Gistic2_all_data_by_genes	ML		micro	0.6	0.6	0.6	0.6	0.87
lusc_k_fold	copy number (gene-level)	Gistic2_all_data_by_genes	ML		weighted	0.6	0.59	0.6	0.58	0.84
lusc_k_fold	copy number (gene-level)	Gistic2_all_data_by_genes	ML	BERNOULLI_NB	macro	0.41	0.43	0.41	0.4	0.83
lusc_k_fold	copy number (gene-level)	Gistic2_all_data_by_genes	ML		micro	0.49	0.49	0.49	0.49	0.83
lusc_k_fold	copy number (gene-level)	Gistic2_all_data_by_genes	ML		weighted	0.49	0.5	0.49	0.48	0.83
lusc_k_fold	copy number (gene-level)	Gistic2_all_data_by_genes	ML	LOGISTIC_REGRESSION	macro	0.55	0.64	0.55	0.55	0.86
lusc_k_fold	copy number (gene-level)	Gistic2_all_data_by_genes	ML		micro	0.61	0.61	0.61	0.61	0.87
lusc_k_fold	copy number (gene-level)	Gistic2_all_data_by_genes	ML		weighted	0.61	0.64	0.61	0.59	0.85
lusc_k_fold	copy number (gene-level)	Gistic2_all_data_by_genes	ML	ADA_BOOST	macro	0.45	0.39	0.45	0.4	0.84
lusc_k_fold	copy number (gene-level)	Gistic2_all_data_by_genes	ML		micro	0.54	0.54	0.54	0.54	0.85
lusc_k_fold	copy number (gene-level)	Gistic2_all_data_by_genes	ML		weighted	0.54	0.45	0.54	0.48	0.8
lusc_k_fold	copy number (gene-level)	Gistic2_all_data_by_genes	ML	GBOOST	macro	0.25	0.09	0.25	0.13	0.75
lusc_k_fold	copy number (gene-level)	Gistic2_all_data_by_genes	ML		micro	0.37	0.37	0.37	0.37	0.79
lusc_k_fold	copy number (gene-level)	Gistic2_all_data_by_genes	ML		weighted	0.37	0.13	0.37	0.2	0.63
lusc_k_fold	copy number (gene-level)	Gistic2_all_data_by_genes	ML	XGBOOST	macro	0.58	0.59	0.58	0.58	0.87
lusc_k_fold	copy number (gene-level)	Gistic2_all_data_by_genes	ML		micro	0.63	0.63	0.63	0.63	0.88
lusc_k_fold	copy number (gene-level)	Gistic2_all_data_by_genes	ML		weighted	0.63	0.62	0.63	0.62	0.86
lusc_k_fold	copy number (gene-level)	Gistic2_all_data_by_genes	ML	QUADRATIC_DISCRIMINANT	macro	0.24	0.25	0.24	0.21	0.75
lusc_k_fold	copy number (gene-level)	Gistic2_all_data_by_genes	ML		micro	0.23	0.23	0.23	0.23	0.74
lusc_k_fold	copy number (gene-level)	Gistic2_all_data_by_genes	ML		weighted	0.23	0.27	0.23	0.21	0.77
lusc_k_fold	copy number (gene-level)	Gistic2_all_data_by_genes	ML	MLP	macro	0.5	0.53	0.5	0.48	0.85
lusc_k_fold	copy number (gene-level)	Gistic2_all_data_by_genes	ML		micro	0.56	0.56	0.56	0.56	0.85
lusc_k_fold	copy number (gene-level)	Gistic2_all_data_by_genes	ML		weighted	0.56	0.57	0.56	0.54	0.84
lusc_k_fold	copy number (gene-level)	Gistic2_all_data_by_genes	ML	RANDOM_FOREST	macro	0.5	0.57	0.5	0.49	0.85
lusc_k_fold	copy number (gene-level)	Gistic2_all_data_by_genes	ML		micro	0.58	0.58	0.58	0.58	0.86
lusc_k_fold	copy number (gene-level)	Gistic2_all_data_by_genes	ML		weighted	0.58	0.57	0.58	0.54	0.82
lusc_k_fold	copy number (gene-level)	Gistic2_all_data_by_genes	ML	DECISION_TREE	macro	0.43	0.43	0.43	0.42	0.82
lusc_k_fold	copy number (gene-level)	Gistic2_all_data_by_genes	ML		micro	0.48	0.48	0.48	0.48	0.83
lusc_k_fold	copy number (gene-level)	Gistic2_all_data_by_genes	ML		weighted	0.48	0.47	0.48	0.47	0.81
lusc_k_fold	copy number (gene-level)	Gistic2_all_thresholded	DL	DEEPGENE	macro	0.412	0.411	0.412	0.382	0.815
lusc_k_fold	copy number (gene-level)	Gistic2_all_thresholded	DL		micro	0.479	0.479	0.479	0.479	0.826
lusc_k_fold	copy number (gene-level)	Gistic2_all_thresholded	DL		weighted	0.479	0.434	0.479	0.433	0.783
lusc_k_fold	copy number (gene-level)	Gistic2_all_thresholded	DL	CNN	macro	0.5	0.48	0.5	0.47	0.85
lusc_k_fold	copy number (gene-level)	Gistic2_all_thresholded	DL		micro	0.56	0.56	0.56	0.56	0.85
lusc_k_fold	copy number (gene-level)	Gistic2_all_thresholded	DL		weighted	0.56	0.53	0.56	0.53	0.83
lusc_k_fold	copy number (gene-level)	Gistic2_all_thresholded	DL	RESNET34	macro	0.3	0.18	0.3	0.22	0.78
lusc_k_fold	copy number (gene-level)	Gistic2_all_thresholded	DL		micro	0.39	0.39	0.39	0.39	0.8
lusc_k_fold	copy number (gene-level)	Gistic2_all_thresholded	DL		weighted	0.39	0.23	0.39	0.28	0.71
lusc_k_fold	copy number (gene-level)	Gistic2_all_thresholded	DL	CNN_LSTM	macro	0.4	0.26	0.4	0.31	0.81
lusc_k_fold	copy number (gene-level)	Gistic2_all_thresholded	DL		micro	0.5	0.5	0.5	0.5	0.83
lusc_k_fold	copy number (gene-level)	Gistic2_all_thresholded	DL		weighted	0.5	0.32	0.5	0.38	0.76
lusc_k_fold	copy number (gene-level)	Gistic2_all_thresholded	DL	RESNET101	macro	0.33	0.34	0.33	0.3	0.78
lusc_k_fold	copy number (gene-level)	Gistic2_all_thresholded	DL		micro	0.37	0.37	0.37	0.37	0.79
lusc_k_fold	copy number (gene-level)	Gistic2_all_thresholded	DL		weighted	0.37	0.35	0.37	0.33	0.74
lusc_k_fold	copy number (gene-level)	Gistic2_all_thresholded	DL	DENSENET161	macro	0.21	0.15	0.21	0.14	0.74
lusc_k_fold	copy number (gene-level)	Gistic2_all_thresholded	DL		micro	0.28	0.28	0.28	0.28	0.76
lusc_k_fold	copy number (gene-level)	Gistic2_all_thresholded	DL		weighted	0.28	0.2	0.28	0.19	0.69
lusc_k_fold	copy number (gene-level)	Gistic2_all_thresholded	DL	LSTM	macro	0.45	0.39	0.45	0.4	0.84
lusc_k_fold	copy number (gene-level)	Gistic2_all_thresholded	DL		micro	0.54	0.54	0.54	0.54	0.85
lusc_k_fold	copy number (gene-level)	Gistic2_all_thresholded	DL		weighted	0.54	0.46	0.54	0.48	0.81
lusc_k_fold	copy number (gene-level)	Gistic2_all_thresholded	DL	RESNET50	macro	0.3	0.18	0.3	0.21	0.78
lusc_k_fold	copy number (gene-level)	Gistic2_all_thresholded	DL		micro	0.39	0.39	0.39	0.39	0.8
lusc_k_fold	copy number (gene-level)	Gistic2_all_thresholded	DL		weighted	0.39	0.23	0.39	0.27	0.72
lusc_k_fold	copy number (gene-level)	Gistic2_all_thresholded	DL	RNN	macro	0.41	0.38	0.41	0.38	0.82
lusc_k_fold	copy number (gene-level)	Gistic2_all_thresholded	DL		micro	0.5	0.5	0.5	0.5	0.83
lusc_k_fold	copy number (gene-level)	Gistic2_all_thresholded	DL		weighted	0.5	0.44	0.5	0.45	0.8
lusc_k_fold	copy number (gene-level)	Gistic2_all_thresholded	DL	CNN_GRU	macro	0.46	0.46	0.46	0.43	0.84
lusc_k_fold	copy number (gene-level)	Gistic2_all_thresholded	DL		micro	0.55	0.55	0.55	0.55	0.85
lusc_k_fold	copy number (gene-level)	Gistic2_all_thresholded	DL		weighted	0.55	0.5	0.55	0.5	0.81
lusc_k_fold	copy number (gene-level)	Gistic2_all_thresholded	DL	RESNET18	macro	0.3	0.22	0.3	0.23	0.77
lusc_k_fold	copy number (gene-level)	Gistic2_all_thresholded	DL		micro	0.35	0.35	0.35	0.35	0.78
lusc_k_fold	copy number (gene-level)	Gistic2_all_thresholded	DL		weighted	0.35	0.26	0.35	0.27	0.74
lusc_k_fold	copy number (gene-level)	Gistic2_all_thresholded	DL	NN	macro	0.48	0.49	0.48	0.47	0.84
lusc_k_fold	copy number (gene-level)	Gistic2_all_thresholded	DL		micro	0.54	0.54	0.54	0.54	0.85
lusc_k_fold	copy number (gene-level)	Gistic2_all_thresholded	DL		weighted	0.54	0.54	0.54	0.53	0.83
lusc_k_fold	copy number (gene-level)	Gistic2_all_thresholded	DL	DENSENET201	macro	0.3	0.21	0.3	0.23	0.77
lusc_k_fold	copy number (gene-level)	Gistic2_all_thresholded	DL		micro	0.36	0.36	0.36	0.36	0.79
lusc_k_fold	copy number (gene-level)	Gistic2_all_thresholded	DL		weighted	0.36	0.26	0.36	0.28	0.73
lusc_k_fold	copy number (gene-level)	Gistic2_all_thresholded	DL	GRU	macro	0.42	0.38	0.42	0.38	0.83
lusc_k_fold	copy number (gene-level)	Gistic2_all_thresholded	DL		micro	0.51	0.51	0.51	0.51	0.84
lusc_k_fold	copy number (gene-level)	Gistic2_all_thresholded	DL		weighted	0.51	0.45	0.51	0.46	0.8
lusc_k_fold	copy number (gene-level)	Gistic2_all_thresholded	DL	DENSENET264	macro	0.24	0.2	0.24	0.16	0.75
lusc_k_fold	copy number (gene-level)	Gistic2_all_thresholded	DL		micro	0.26	0.26	0.26	0.26	0.75
lusc_k_fold	copy number (gene-level)	Gistic2_all_thresholded	DL		weighted	0.26	0.19	0.26	0.18	0.72
lusc_k_fold	copy number (gene-level)	Gistic2_all_thresholded	DL	RESNET152	macro	0.27	0.17	0.27	0.17	0.76
lusc_k_fold	copy number (gene-level)	Gistic2_all_thresholded	DL		micro	0.34	0.34	0.34	0.34	0.78
lusc_k_fold	copy number (gene-level)	Gistic2_all_thresholded	DL		weighted	0.34	0.18	0.34	0.2	0.69
lusc_k_fold	copy number (gene-level)	Gistic2_all_thresholded	DL	DENSENET169	macro	0.28	0.21	0.28	0.22	0.77
lusc_k_fold	copy number (gene-level)	Gistic2_all_thresholded	DL		micro	0.36	0.36	0.36	0.36	0.79
lusc_k_fold	copy number (gene-level)	Gistic2_all_thresholded	DL		weighted	0.36	0.26	0.36	0.28	0.7
lusc_k_fold	copy number (gene-level)	Gistic2_all_thresholded	DL	CNN_RNN	macro	0.45	0.47	0.45	0.42	0.84
lusc_k_fold	copy number (gene-level)	Gistic2_all_thresholded	DL		micro	0.52	0.52	0.52	0.52	0.84
lusc_k_fold	copy number (gene-level)	Gistic2_all_thresholded	DL		weighted	0.52	0.5	0.52	0.48	0.82
lusc_k_fold	copy number (gene-level)	Gistic2_all_thresholded	DL	DENSENET121	macro	0.3	0.25	0.3	0.24	0.77
lusc_k_fold	copy number (gene-level)	Gistic2_all_thresholded	DL		micro	0.37	0.37	0.37	0.37	0.79
lusc_k_fold	copy number (gene-level)	Gistic2_all_thresholded	DL		weighted	0.37	0.29	0.37	0.3	0.7
lusc_k_fold	copy number (gene-level)	Gistic2_all_thresholded	ML	LIGHTGBM	macro	0.25	0.09	0.25	0.13	0.75
lusc_k_fold	copy number (gene-level)	Gistic2_all_thresholded	ML		micro	0.37	0.37	0.37	0.37	0.79
lusc_k_fold	copy number (gene-level)	Gistic2_all_thresholded	ML		weighted	0.37	0.13	0.37	0.2	0.63
lusc_k_fold	copy number (gene-level)	Gistic2_all_thresholded	ML	GAUSSIAN_NB	macro	0.48	0.48	0.48	0.47	0.84
lusc_k_fold	copy number (gene-level)	Gistic2_all_thresholded	ML		micro	0.52	0.52	0.52	0.52	0.84
lusc_k_fold	copy number (gene-level)	Gistic2_all_thresholded	ML		weighted	0.52	0.52	0.52	0.51	0.84
lusc_k_fold	copy number (gene-level)	Gistic2_all_thresholded	ML	K_NEIGHBORS	macro	0.35	0.32	0.35	0.29	0.79
lusc_k_fold	copy number (gene-level)	Gistic2_all_thresholded	ML		micro	0.38	0.38	0.38	0.38	0.79
lusc_k_fold	copy number (gene-level)	Gistic2_all_thresholded	ML		weighted	0.38	0.4	0.38	0.34	0.79
lusc_k_fold	copy number (gene-level)	Gistic2_all_thresholded	ML	HISTGBOOST	macro	0.47	0.45	0.47	0.45	0.85
lusc_k_fold	copy number (gene-level)	Gistic2_all_thresholded	ML		micro	0.55	0.55	0.55	0.55	0.85
lusc_k_fold	copy number (gene-level)	Gistic2_all_thresholded	ML		weighted	0.55	0.52	0.55	0.52	0.83
lusc_k_fold	copy number (gene-level)	Gistic2_all_thresholded	ML	CATBOOST	macro	0.47	0.42	0.47	0.42	0.84
lusc_k_fold	copy number (gene-level)	Gistic2_all_thresholded	ML		micro	0.57	0.57	0.57	0.57	0.86
lusc_k_fold	copy number (gene-level)	Gistic2_all_thresholded	ML		weighted	0.57	0.47	0.57	0.5	0.8
lusc_k_fold	copy number (gene-level)	Gistic2_all_thresholded	ML	SVM_LINEAR	macro	0.43	0.43	0.43	0.41	0.83
lusc_k_fold	copy number (gene-level)	Gistic2_all_thresholded	ML		micro	0.51	0.51	0.51	0.51	0.84
lusc_k_fold	copy number (gene-level)	Gistic2_all_thresholded	ML		weighted	0.51	0.48	0.51	0.48	0.81
lusc_k_fold	copy number (gene-level)	Gistic2_all_thresholded	ML	BERNOULLI_NB	macro	0.46	0.47	0.46	0.45	0.83
lusc_k_fold	copy number (gene-level)	Gistic2_all_thresholded	ML		micro	0.49	0.49	0.49	0.49	0.83
lusc_k_fold	copy number (gene-level)	Gistic2_all_thresholded	ML		weighted	0.49	0.51	0.49	0.48	0.82
lusc_k_fold	copy number (gene-level)	Gistic2_all_thresholded	ML	LOGISTIC_REGRESSION	macro	0.49	0.49	0.49	0.48	0.84
lusc_k_fold	copy number (gene-level)	Gistic2_all_thresholded	ML		micro	0.54	0.54	0.54	0.54	0.85
lusc_k_fold	copy number (gene-level)	Gistic2_all_thresholded	ML		weighted	0.54	0.53	0.54	0.53	0.84
lusc_k_fold	copy number (gene-level)	Gistic2_all_thresholded	ML	ADA_BOOST	macro	0.41	0.37	0.41	0.36	0.82
lusc_k_fold	copy number (gene-level)	Gistic2_all_thresholded	ML		micro	0.49	0.49	0.49	0.49	0.83
lusc_k_fold	copy number (gene-level)	Gistic2_all_thresholded	ML		weighted	0.49	0.43	0.49	0.43	0.79
lusc_k_fold	copy number (gene-level)	Gistic2_all_thresholded	ML	GBOOST	macro	0.25	0.09	0.25	0.13	0.75
lusc_k_fold	copy number (gene-level)	Gistic2_all_thresholded	ML		micro	0.37	0.37	0.37	0.37	0.79
lusc_k_fold	copy number (gene-level)	Gistic2_all_thresholded	ML		weighted	0.37	0.13	0.37	0.2	0.63
lusc_k_fold	copy number (gene-level)	Gistic2_all_thresholded	ML	XGBOOST	macro	0.49	0.46	0.49	0.47	0.85
lusc_k_fold	copy number (gene-level)	Gistic2_all_thresholded	ML		micro	0.56	0.56	0.56	0.56	0.85
lusc_k_fold	copy number (gene-level)	Gistic2_all_thresholded	ML		weighted	0.56	0.52	0.56	0.53	0.83
lusc_k_fold	copy number (gene-level)	Gistic2_all_thresholded	ML	QUADRATIC_DISCRIMINANT	macro	0.25	0.23	0.25	0.22	0.74
lusc_k_fold	copy number (gene-level)	Gistic2_all_thresholded	ML		micro	0.22	0.22	0.22	0.22	0.74
lusc_k_fold	copy number (gene-level)	Gistic2_all_thresholded	ML		weighted	0.22	0.25	0.22	0.21	0.76
lusc_k_fold	copy number (gene-level)	Gistic2_all_thresholded	ML	MLP	macro	0.42	0.4	0.42	0.4	0.82
lusc_k_fold	copy number (gene-level)	Gistic2_all_thresholded	ML		micro	0.49	0.49	0.49	0.49	0.83
lusc_k_fold	copy number (gene-level)	Gistic2_all_thresholded	ML		weighted	0.49	0.45	0.49	0.46	0.8
lusc_k_fold	copy number (gene-level)	Gistic2_all_thresholded	ML	RANDOM_FOREST	macro	0.48	0.45	0.48	0.44	0.85
lusc_k_fold	copy number (gene-level)	Gistic2_all_thresholded	ML		micro	0.57	0.57	0.57	0.57	0.86
lusc_k_fold	copy number (gene-level)	Gistic2_all_thresholded	ML		weighted	0.57	0.5	0.57	0.52	0.82
lusc_k_fold	copy number (gene-level)	Gistic2_all_thresholded	ML	DECISION_TREE	macro	0.41	0.42	0.41	0.41	0.82
lusc_k_fold	copy number (gene-level)	Gistic2_all_thresholded	ML		micro	0.47	0.47	0.47	0.47	0.82
lusc_k_fold	copy number (gene-level)	Gistic2_all_thresholded	ML		weighted	0.47	0.47	0.47	0.46	0.81
lusc_k_fold	gene expression array	AgilentG4502A_07_3	DL	DEEPGENE	macro	0.76	0.871	0.76	0.783	0.928
lusc_k_fold	gene expression array	AgilentG4502A_07_3	DL		micro	0.812	0.812	0.812	0.812	0.937
lusc_k_fold	gene expression array	AgilentG4502A_07_3	DL		weighted	0.812	0.847	0.812	0.803	0.902
lusc_k_fold	gene expression array	AgilentG4502A_07_3	DL	CNN	macro	0.79	0.83	0.79	0.8	0.94
lusc_k_fold	gene expression array	AgilentG4502A_07_3	DL		micro	0.82	0.82	0.82	0.82	0.94
lusc_k_fold	gene expression array	AgilentG4502A_07_3	DL		weighted	0.82	0.85	0.82	0.82	0.94
lusc_k_fold	gene expression array	AgilentG4502A_07_3	DL	RESNET34	macro	0.51	0.55	0.51	0.47	0.85
lusc_k_fold	gene expression array	AgilentG4502A_07_3	DL		micro	0.56	0.56	0.56	0.56	0.85
lusc_k_fold	gene expression array	AgilentG4502A_07_3	DL		weighted	0.56	0.61	0.56	0.53	0.86
lusc_k_fold	gene expression array	AgilentG4502A_07_3	DL	CNN_LSTM	macro	0.25	0.09	0.25	0.14	0.75
lusc_k_fold	gene expression array	AgilentG4502A_07_3	DL		micro	0.37	0.37	0.37	0.37	0.79
lusc_k_fold	gene expression array	AgilentG4502A_07_3	DL		weighted	0.37	0.14	0.37	0.2	0.63
lusc_k_fold	gene expression array	AgilentG4502A_07_3	DL	RESNET101	macro	0.62	0.63	0.62	0.56	0.87
lusc_k_fold	gene expression array	AgilentG4502A_07_3	DL		micro	0.62	0.62	0.62	0.62	0.87
lusc_k_fold	gene expression array	AgilentG4502A_07_3	DL		weighted	0.62	0.66	0.62	0.58	0.87
lusc_k_fold	gene expression array	AgilentG4502A_07_3	DL	DENSENET161	macro	0.23	0.18	0.23	0.18	0.74
lusc_k_fold	gene expression array	AgilentG4502A_07_3	DL		micro	0.24	0.24	0.24	0.24	0.75
lusc_k_fold	gene expression array	AgilentG4502A_07_3	DL		weighted	0.24	0.2	0.24	0.19	0.73
lusc_k_fold	gene expression array	AgilentG4502A_07_3	DL	LSTM	macro	0.64	0.64	0.64	0.61	0.9
lusc_k_fold	gene expression array	AgilentG4502A_07_3	DL		micro	0.74	0.74	0.74	0.74	0.91
lusc_k_fold	gene expression array	AgilentG4502A_07_3	DL		weighted	0.74	0.68	0.74	0.68	0.87
lusc_k_fold	gene expression array	AgilentG4502A_07_3	DL	RESNET50	macro	0.65	0.66	0.65	0.6	0.89
lusc_k_fold	gene expression array	AgilentG4502A_07_3	DL		micro	0.66	0.66	0.66	0.66	0.89
lusc_k_fold	gene expression array	AgilentG4502A_07_3	DL		weighted	0.66	0.67	0.66	0.62	0.89
lusc_k_fold	gene expression array	AgilentG4502A_07_3	DL	RNN	macro	0.72	0.71	0.72	0.69	0.93
lusc_k_fold	gene expression array	AgilentG4502A_07_3	DL		micro	0.8	0.8	0.8	0.8	0.93
lusc_k_fold	gene expression array	AgilentG4502A_07_3	DL		weighted	0.8	0.75	0.8	0.75	0.91
lusc_k_fold	gene expression array	AgilentG4502A_07_3	DL	CNN_GRU	macro	0.25	0.09	0.25	0.14	0.75
lusc_k_fold	gene expression array	AgilentG4502A_07_3	DL		micro	0.37	0.37	0.37	0.37	0.79
lusc_k_fold	gene expression array	AgilentG4502A_07_3	DL		weighted	0.37	0.14	0.37	0.2	0.63
lusc_k_fold	gene expression array	AgilentG4502A_07_3	DL	RESNET18	macro	0.35	0.19	0.35	0.22	0.79
lusc_k_fold	gene expression array	AgilentG4502A_07_3	DL		micro	0.37	0.37	0.37	0.37	0.79
lusc_k_fold	gene expression array	AgilentG4502A_07_3	DL		weighted	0.37	0.22	0.37	0.25	0.77
lusc_k_fold	gene expression array	AgilentG4502A_07_3	DL	NN	macro	0.75	0.81	0.75	0.75	0.93
lusc_k_fold	gene expression array	AgilentG4502A_07_3	DL		micro	0.79	0.79	0.79	0.79	0.93
lusc_k_fold	gene expression array	AgilentG4502A_07_3	DL		weighted	0.79	0.82	0.79	0.78	0.92
lusc_k_fold	gene expression array	AgilentG4502A_07_3	DL	DENSENET201	macro	0.27	0.18	0.27	0.18	0.76
lusc_k_fold	gene expression array	AgilentG4502A_07_3	DL		micro	0.33	0.33	0.33	0.33	0.78
lusc_k_fold	gene expression array	AgilentG4502A_07_3	DL		weighted	0.33	0.22	0.33	0.22	0.7
lusc_k_fold	gene expression array	AgilentG4502A_07_3	DL	GRU	macro	0.68	0.64	0.68	0.64	0.92
lusc_k_fold	gene expression array	AgilentG4502A_07_3	DL		micro	0.77	0.77	0.77	0.77	0.92
lusc_k_fold	gene expression array	AgilentG4502A_07_3	DL		weighted	0.77	0.69	0.77	0.71	0.9
lusc_k_fold	gene expression array	AgilentG4502A_07_3	DL	DENSENET264	macro	0.31	0.28	0.31	0.21	0.77
lusc_k_fold	gene expression array	AgilentG4502A_07_3	DL		micro	0.32	0.32	0.32	0.32	0.77
lusc_k_fold	gene expression array	AgilentG4502A_07_3	DL		weighted	0.32	0.3	0.32	0.22	0.76
lusc_k_fold	gene expression array	AgilentG4502A_07_3	DL	RESNET152	macro	0.41	0.39	0.41	0.36	0.81
lusc_k_fold	gene expression array	AgilentG4502A_07_3	DL		micro	0.47	0.47	0.47	0.47	0.82
lusc_k_fold	gene expression array	AgilentG4502A_07_3	DL		weighted	0.47	0.42	0.47	0.4	0.78
lusc_k_fold	gene expression array	AgilentG4502A_07_3	DL	DENSENET169	macro	0.35	0.28	0.35	0.25	0.78
lusc_k_fold	gene expression array	AgilentG4502A_07_3	DL		micro	0.4	0.4	0.4	0.4	0.8
lusc_k_fold	gene expression array	AgilentG4502A_07_3	DL		weighted	0.4	0.3	0.4	0.28	0.74
lusc_k_fold	gene expression array	AgilentG4502A_07_3	DL	CNN_RNN	macro	0.32	0.18	0.32	0.21	0.78
lusc_k_fold	gene expression array	AgilentG4502A_07_3	DL		micro	0.44	0.44	0.44	0.44	0.81
lusc_k_fold	gene expression array	AgilentG4502A_07_3	DL		weighted	0.44	0.24	0.44	0.29	0.69
lusc_k_fold	gene expression array	AgilentG4502A_07_3	DL	DENSENET121	macro	0.26	0.24	0.26	0.21	0.75
lusc_k_fold	gene expression array	AgilentG4502A_07_3	DL		micro	0.29	0.29	0.29	0.29	0.76
lusc_k_fold	gene expression array	AgilentG4502A_07_3	DL		weighted	0.29	0.28	0.29	0.23	0.71
lusc_k_fold	gene expression array	AgilentG4502A_07_3	ML	LIGHTGBM	macro	0.25	0.09	0.25	0.14	0.75
lusc_k_fold	gene expression array	AgilentG4502A_07_3	ML		micro	0.37	0.37	0.37	0.37	0.79
lusc_k_fold	gene expression array	AgilentG4502A_07_3	ML		weighted	0.37	0.14	0.37	0.2	0.63
lusc_k_fold	gene expression array	AgilentG4502A_07_3	ML	GAUSSIAN_NB	macro	0.72	0.78	0.72	0.71	0.92
lusc_k_fold	gene expression array	AgilentG4502A_07_3	ML		micro	0.78	0.78	0.78	0.78	0.93
lusc_k_fold	gene expression array	AgilentG4502A_07_3	ML		weighted	0.78	0.79	0.78	0.75	0.91
lusc_k_fold	gene expression array	AgilentG4502A_07_3	ML	K_NEIGHBORS	macro	0.6	0.55	0.6	0.55	0.89
lusc_k_fold	gene expression array	AgilentG4502A_07_3	ML		micro	0.7	0.7	0.7	0.7	0.9
lusc_k_fold	gene expression array	AgilentG4502A_07_3	ML		weighted	0.7	0.61	0.7	0.63	0.85
lusc_k_fold	gene expression array	AgilentG4502A_07_3	ML	HISTGBOOST	macro	0.68	0.72	0.68	0.68	0.91
lusc_k_fold	gene expression array	AgilentG4502A_07_3	ML		micro	0.73	0.73	0.73	0.73	0.91
lusc_k_fold	gene expression array	AgilentG4502A_07_3	ML		weighted	0.73	0.74	0.73	0.72	0.9
lusc_k_fold	gene expression array	AgilentG4502A_07_3	ML	CATBOOST	macro	0.6	0.61	0.6	0.57	0.89
lusc_k_fold	gene expression array	AgilentG4502A_07_3	ML		micro	0.71	0.71	0.71	0.71	0.9
lusc_k_fold	gene expression array	AgilentG4502A_07_3	ML		weighted	0.71	0.65	0.71	0.64	0.84
lusc_k_fold	gene expression array	AgilentG4502A_07_3	ML	SVM_LINEAR	macro	0.79	0.89	0.79	0.8	0.94
lusc_k_fold	gene expression array	AgilentG4502A_07_3	ML		micro	0.84	0.84	0.84	0.84	0.95
lusc_k_fold	gene expression array	AgilentG4502A_07_3	ML		weighted	0.84	0.87	0.84	0.83	0.93
lusc_k_fold	gene expression array	AgilentG4502A_07_3	ML	BERNOULLI_NB	macro	0.72	0.78	0.72	0.72	0.92
lusc_k_fold	gene expression array	AgilentG4502A_07_3	ML		micro	0.78	0.78	0.78	0.78	0.93
lusc_k_fold	gene expression array	AgilentG4502A_07_3	ML		weighted	0.78	0.79	0.78	0.76	0.91
lusc_k_fold	gene expression array	AgilentG4502A_07_3	ML	LOGISTIC_REGRESSION	macro	0.78	0.79	0.78	0.76	0.94
lusc_k_fold	gene expression array	AgilentG4502A_07_3	ML		micro	0.84	0.84	0.84	0.84	0.95
lusc_k_fold	gene expression array	AgilentG4502A_07_3	ML		weighted	0.84	0.81	0.84	0.81	0.93
lusc_k_fold	gene expression array	AgilentG4502A_07_3	ML	ADA_BOOST	macro	0.52	0.58	0.52	0.52	0.85
lusc_k_fold	gene expression array	AgilentG4502A_07_3	ML		micro	0.55	0.55	0.55	0.55	0.85
lusc_k_fold	gene expression array	AgilentG4502A_07_3	ML		weighted	0.55	0.61	0.55	0.55	0.84
lusc_k_fold	gene expression array	AgilentG4502A_07_3	ML	GBOOST	macro	0.26	0.12	0.26	0.16	0.76
lusc_k_fold	gene expression array	AgilentG4502A_07_3	ML		micro	0.38	0.38	0.38	0.38	0.79
lusc_k_fold	gene expression array	AgilentG4502A_07_3	ML		weighted	0.38	0.17	0.38	0.23	0.64
lusc_k_fold	gene expression array	AgilentG4502A_07_3	ML	XGBOOST	macro	0.72	0.74	0.72	0.71	0.92
lusc_k_fold	gene expression array	AgilentG4502A_07_3	ML		micro	0.75	0.75	0.75	0.75	0.92
lusc_k_fold	gene expression array	AgilentG4502A_07_3	ML		weighted	0.75	0.77	0.75	0.74	0.91
lusc_k_fold	gene expression array	AgilentG4502A_07_3	ML	QUADRATIC_DISCRIMINANT	macro	0.31	0.35	0.31	0.29	0.77
lusc_k_fold	gene expression array	AgilentG4502A_07_3	ML		micro	0.31	0.31	0.31	0.31	0.77
lusc_k_fold	gene expression array	AgilentG4502A_07_3	ML		weighted	0.31	0.39	0.31	0.31	0.78
lusc_k_fold	gene expression array	AgilentG4502A_07_3	ML	MLP	macro	0.74	0.75	0.74	0.72	0.93
lusc_k_fold	gene expression array	AgilentG4502A_07_3	ML		micro	0.8	0.8	0.8	0.8	0.93
lusc_k_fold	gene expression array	AgilentG4502A_07_3	ML		weighted	0.8	0.77	0.8	0.77	0.91
lusc_k_fold	gene expression array	AgilentG4502A_07_3	ML	RANDOM_FOREST	macro	0.68	0.71	0.68	0.65	0.91
lusc_k_fold	gene expression array	AgilentG4502A_07_3	ML		micro	0.76	0.76	0.76	0.76	0.92
lusc_k_fold	gene expression array	AgilentG4502A_07_3	ML		weighted	0.76	0.73	0.76	0.72	0.89
lusc_k_fold	gene expression array	AgilentG4502A_07_3	ML	DECISION_TREE	macro	0.54	0.55	0.54	0.53	0.86
lusc_k_fold	gene expression array	AgilentG4502A_07_3	ML		micro	0.59	0.59	0.59	0.59	0.86
lusc_k_fold	gene expression array	AgilentG4502A_07_3	ML		weighted	0.59	0.59	0.59	0.57	0.85
lusc_k_fold	gene expression array	HT_HG-U133A	DL	DEEPGENE	macro	0.252	0.125	0.252	0.158	0.753
lusc_k_fold	gene expression array	HT_HG-U133A	DL		micro	0.325	0.325	0.325	0.325	0.775
lusc_k_fold	gene expression array	HT_HG-U133A	DL		weighted	0.325	0.167	0.325	0.208	0.686
lusc_k_fold	gene expression array	HT_HG-U133A	DL	CNN	macro	0.32	0.23	0.32	0.21	0.78
lusc_k_fold	gene expression array	HT_HG-U133A	DL		micro	0.4	0.4	0.4	0.4	0.8
lusc_k_fold	gene expression array	HT_HG-U133A	DL		weighted	0.4	0.28	0.4	0.26	0.73
lusc_k_fold	gene expression array	HT_HG-U133A	DL	RESNET34	macro	0.51	0.56	0.51	0.45	0.85
lusc_k_fold	gene expression array	HT_HG-U133A	DL		micro	0.55	0.55	0.55	0.55	0.85
lusc_k_fold	gene expression array	HT_HG-U133A	DL		weighted	0.55	0.67	0.55	0.51	0.86
lusc_k_fold	gene expression array	HT_HG-U133A	DL	CNN_LSTM	macro	0.25	0.08	0.25	0.12	0.75
lusc_k_fold	gene expression array	HT_HG-U133A	DL		micro	0.33	0.33	0.33	0.33	0.78
lusc_k_fold	gene expression array	HT_HG-U133A	DL		weighted	0.33	0.11	0.33	0.16	0.68
lusc_k_fold	gene expression array	HT_HG-U133A	DL	RESNET101	macro	0.61	0.56	0.61	0.56	0.88
lusc_k_fold	gene expression array	HT_HG-U133A	DL		micro	0.66	0.66	0.66	0.66	0.89
lusc_k_fold	gene expression array	HT_HG-U133A	DL		weighted	0.66	0.62	0.66	0.61	0.86
lusc_k_fold	gene expression array	HT_HG-U133A	DL	DENSENET161	macro	0.27	0.17	0.27	0.18	0.76
lusc_k_fold	gene expression array	HT_HG-U133A	DL		micro	0.34	0.34	0.34	0.34	0.78
lusc_k_fold	gene expression array	HT_HG-U133A	DL		weighted	0.34	0.21	0.34	0.23	0.7
lusc_k_fold	gene expression array	HT_HG-U133A	DL	LSTM	macro	0.25	0.09	0.25	0.13	0.75
lusc_k_fold	gene expression array	HT_HG-U133A	DL		micro	0.35	0.35	0.35	0.35	0.78
lusc_k_fold	gene expression array	HT_HG-U133A	DL		weighted	0.35	0.12	0.35	0.18	0.65
lusc_k_fold	gene expression array	HT_HG-U133A	DL	RESNET50	macro	0.61	0.63	0.61	0.56	0.88
lusc_k_fold	gene expression array	HT_HG-U133A	DL		micro	0.66	0.66	0.66	0.66	0.89
lusc_k_fold	gene expression array	HT_HG-U133A	DL		weighted	0.66	0.65	0.66	0.61	0.86
lusc_k_fold	gene expression array	HT_HG-U133A	DL	RNN	macro	0.25	0.08	0.25	0.13	0.75
lusc_k_fold	gene expression array	HT_HG-U133A	DL		micro	0.34	0.34	0.34	0.34	0.78
lusc_k_fold	gene expression array	HT_HG-U133A	DL		weighted	0.34	0.11	0.34	0.17	0.66
lusc_k_fold	gene expression array	HT_HG-U133A	DL	CNN_GRU	macro	0.25	0.09	0.25	0.13	0.75
lusc_k_fold	gene expression array	HT_HG-U133A	DL		micro	0.35	0.35	0.35	0.35	0.78
lusc_k_fold	gene expression array	HT_HG-U133A	DL		weighted	0.35	0.12	0.35	0.18	0.65
lusc_k_fold	gene expression array	HT_HG-U133A	DL	RESNET18	macro	0.49	0.43	0.49	0.4	0.84
lusc_k_fold	gene expression array	HT_HG-U133A	DL		micro	0.55	0.55	0.55	0.55	0.85
lusc_k_fold	gene expression array	HT_HG-U133A	DL		weighted	0.55	0.46	0.55	0.45	0.8
lusc_k_fold	gene expression array	HT_HG-U133A	DL	NN	macro	0.77	0.86	0.77	0.78	0.93
lusc_k_fold	gene expression array	HT_HG-U133A	DL		micro	0.81	0.81	0.81	0.81	0.94
lusc_k_fold	gene expression array	HT_HG-U133A	DL		weighted	0.81	0.85	0.81	0.81	0.93
lusc_k_fold	gene expression array	HT_HG-U133A	DL	DENSENET201	macro	0.28	0.22	0.28	0.21	0.76
lusc_k_fold	gene expression array	HT_HG-U133A	DL		micro	0.29	0.29	0.29	0.29	0.76
lusc_k_fold	gene expression array	HT_HG-U133A	DL		weighted	0.29	0.27	0.29	0.23	0.77
lusc_k_fold	gene expression array	HT_HG-U133A	DL	GRU	macro	0.25	0.08	0.25	0.13	0.75
lusc_k_fold	gene expression array	HT_HG-U133A	DL		micro	0.34	0.34	0.34	0.34	0.78
lusc_k_fold	gene expression array	HT_HG-U133A	DL		weighted	0.34	0.11	0.34	0.17	0.66
lusc_k_fold	gene expression array	HT_HG-U133A	DL	DENSENET264	macro	0.28	0.21	0.28	0.21	0.77
lusc_k_fold	gene expression array	HT_HG-U133A	DL		micro	0.34	0.34	0.34	0.34	0.78
lusc_k_fold	gene expression array	HT_HG-U133A	DL		weighted	0.34	0.26	0.34	0.25	0.74
lusc_k_fold	gene expression array	HT_HG-U133A	DL	RESNET152	macro	0.38	0.31	0.38	0.3	0.8
lusc_k_fold	gene expression array	HT_HG-U133A	DL		micro	0.44	0.44	0.44	0.44	0.81
lusc_k_fold	gene expression array	HT_HG-U133A	DL		weighted	0.44	0.33	0.44	0.33	0.76
lusc_k_fold	gene expression array	HT_HG-U133A	DL	DENSENET169	macro	0.27	0.2	0.27	0.18	0.76
lusc_k_fold	gene expression array	HT_HG-U133A	DL		micro	0.29	0.29	0.29	0.29	0.76
lusc_k_fold	gene expression array	HT_HG-U133A	DL		weighted	0.29	0.25	0.29	0.21	0.74
lusc_k_fold	gene expression array	HT_HG-U133A	DL	CNN_RNN	macro	0.25	0.08	0.25	0.13	0.75
lusc_k_fold	gene expression array	HT_HG-U133A	DL		micro	0.34	0.34	0.34	0.34	0.78
lusc_k_fold	gene expression array	HT_HG-U133A	DL		weighted	0.34	0.11	0.34	0.17	0.66
lusc_k_fold	gene expression array	HT_HG-U133A	DL	DENSENET121	macro	0.27	0.17	0.27	0.2	0.76
lusc_k_fold	gene expression array	HT_HG-U133A	DL		micro	0.32	0.32	0.32	0.32	0.78
lusc_k_fold	gene expression array	HT_HG-U133A	DL		weighted	0.32	0.21	0.32	0.24	0.7
lusc_k_fold	gene expression array	HT_HG-U133A	ML	LIGHTGBM	macro	0.35	0.29	0.35	0.28	0.8
lusc_k_fold	gene expression array	HT_HG-U133A	ML		micro	0.47	0.47	0.47	0.47	0.82
lusc_k_fold	gene expression array	HT_HG-U133A	ML		weighted	0.47	0.36	0.47	0.37	0.73
lusc_k_fold	gene expression array	HT_HG-U133A	ML	GAUSSIAN_NB	macro	0.72	0.79	0.72	0.72	0.92
lusc_k_fold	gene expression array	HT_HG-U133A	ML		micro	0.77	0.77	0.77	0.77	0.92
lusc_k_fold	gene expression array	HT_HG-U133A	ML		weighted	0.77	0.8	0.77	0.76	0.92
lusc_k_fold	gene expression array	HT_HG-U133A	ML	K_NEIGHBORS	macro	0.63	0.59	0.63	0.59	0.9
lusc_k_fold	gene expression array	HT_HG-U133A	ML		micro	0.73	0.73	0.73	0.73	0.91
lusc_k_fold	gene expression array	HT_HG-U133A	ML		weighted	0.73	0.65	0.73	0.67	0.88
lusc_k_fold	gene expression array	HT_HG-U133A	ML	HISTGBOOST	macro	0.76	0.8	0.76	0.76	0.93
lusc_k_fold	gene expression array	HT_HG-U133A	ML		micro	0.81	0.81	0.81	0.81	0.94
lusc_k_fold	gene expression array	HT_HG-U133A	ML		weighted	0.81	0.8	0.81	0.78	0.91
lusc_k_fold	gene expression array	HT_HG-U133A	ML	CATBOOST	macro	0.58	0.59	0.58	0.53	0.89
lusc_k_fold	gene expression array	HT_HG-U133A	ML		micro	0.7	0.7	0.7	0.7	0.9
lusc_k_fold	gene expression array	HT_HG-U133A	ML		weighted	0.7	0.64	0.7	0.62	0.86
lusc_k_fold	gene expression array	HT_HG-U133A	ML	SVM_LINEAR	macro	0.83	0.9	0.83	0.84	0.95
lusc_k_fold	gene expression array	HT_HG-U133A	ML		micro	0.87	0.87	0.87	0.87	0.96
lusc_k_fold	gene expression array	HT_HG-U133A	ML		weighted	0.87	0.88	0.87	0.86	0.94
lusc_k_fold	gene expression array	HT_HG-U133A	ML	BERNOULLI_NB	macro	0.25	0.09	0.25	0.13	0.75
lusc_k_fold	gene expression array	HT_HG-U133A	ML		micro	0.35	0.35	0.35	0.35	0.78
lusc_k_fold	gene expression array	HT_HG-U133A	ML		weighted	0.35	0.12	0.35	0.18	0.65
lusc_k_fold	gene expression array	HT_HG-U133A	ML	LOGISTIC_REGRESSION	macro	0.86	0.92	0.86	0.88	0.96
lusc_k_fold	gene expression array	HT_HG-U133A	ML		micro	0.89	0.89	0.89	0.89	0.96
lusc_k_fold	gene expression array	HT_HG-U133A	ML		weighted	0.89	0.9	0.89	0.89	0.95
lusc_k_fold	gene expression array	HT_HG-U133A	ML	ADA_BOOST	macro	0.56	0.59	0.56	0.51	0.86
lusc_k_fold	gene expression array	HT_HG-U133A	ML		micro	0.58	0.58	0.58	0.58	0.86
lusc_k_fold	gene expression array	HT_HG-U133A	ML		weighted	0.58	0.65	0.58	0.55	0.85
lusc_k_fold	gene expression array	HT_HG-U133A	ML	GBOOST	macro	0.34	0.26	0.34	0.26	0.79
lusc_k_fold	gene expression array	HT_HG-U133A	ML		micro	0.46	0.46	0.46	0.46	0.82
lusc_k_fold	gene expression array	HT_HG-U133A	ML		weighted	0.46	0.34	0.46	0.34	0.72
lusc_k_fold	gene expression array	HT_HG-U133A	ML	XGBOOST	macro	0.66	0.75	0.66	0.66	0.9
lusc_k_fold	gene expression array	HT_HG-U133A	ML		micro	0.7	0.7	0.7	0.7	0.9
lusc_k_fold	gene expression array	HT_HG-U133A	ML		weighted	0.7	0.76	0.7	0.69	0.89
lusc_k_fold	gene expression array	HT_HG-U133A	ML	QUADRATIC_DISCRIMINANT	macro	0.3	0.28	0.3	0.28	0.77
lusc_k_fold	gene expression array	HT_HG-U133A	ML		micro	0.31	0.31	0.31	0.31	0.77
lusc_k_fold	gene expression array	HT_HG-U133A	ML		weighted	0.31	0.32	0.31	0.31	0.76
lusc_k_fold	gene expression array	HT_HG-U133A	ML	MLP	macro	0.58	0.67	0.58	0.55	0.86
lusc_k_fold	gene expression array	HT_HG-U133A	ML		micro	0.58	0.58	0.58	0.58	0.86
lusc_k_fold	gene expression array	HT_HG-U133A	ML		weighted	0.58	0.7	0.58	0.56	0.86
lusc_k_fold	gene expression array	HT_HG-U133A	ML	COMPLEMENT_NB	macro	0.86	0.91	0.86	0.87	0.96
lusc_k_fold	gene expression array	HT_HG-U133A	ML		micro	0.88	0.88	0.88	0.88	0.96
lusc_k_fold	gene expression array	HT_HG-U133A	ML		weighted	0.88	0.9	0.88	0.87	0.95
lusc_k_fold	gene expression array	HT_HG-U133A	ML	RANDOM_FOREST	macro	0.7	0.78	0.7	0.69	0.92
lusc_k_fold	gene expression array	HT_HG-U133A	ML		micro	0.78	0.78	0.78	0.78	0.93
lusc_k_fold	gene expression array	HT_HG-U133A	ML		weighted	0.78	0.78	0.78	0.74	0.9
lusc_k_fold	gene expression array	HT_HG-U133A	ML	DECISION_TREE	macro	0.64	0.7	0.64	0.63	0.89
lusc_k_fold	gene expression array	HT_HG-U133A	ML		micro	0.68	0.68	0.68	0.68	0.89
lusc_k_fold	gene expression array	HT_HG-U133A	ML		weighted	0.68	0.72	0.68	0.67	0.87
lusc_k_fold	somatic mutation (SNP and INDEL)	_mc3_gene_level_	DL	DEEPGENE	macro	0.287	0.366	0.287	0.289	0.752
lusc_k_fold	somatic mutation (SNP and INDEL)	_mc3_gene_level_	DL		micro	0.294	0.294	0.294	0.294	0.765
lusc_k_fold	somatic mutation (SNP and INDEL)	_mc3_gene_level_	DL		weighted	0.294	0.343	0.294	0.287	0.712
lusc_k_fold	somatic mutation (SNP and INDEL)	_mc3_gene_level_	DL	CNN	macro	0.26	0.14	0.26	0.17	0.75
lusc_k_fold	somatic mutation (SNP and INDEL)	_mc3_gene_level_	DL		micro	0.31	0.31	0.31	0.31	0.77
lusc_k_fold	somatic mutation (SNP and INDEL)	_mc3_gene_level_	DL		weighted	0.31	0.16	0.31	0.2	0.69
lusc_k_fold	somatic mutation (SNP and INDEL)	_mc3_gene_level_	DL	RESNET34	macro	0.27	0.15	0.27	0.18	0.76
lusc_k_fold	somatic mutation (SNP and INDEL)	_mc3_gene_level_	DL		micro	0.37	0.37	0.37	0.37	0.79
lusc_k_fold	somatic mutation (SNP and INDEL)	_mc3_gene_level_	DL		weighted	0.37	0.19	0.37	0.24	0.66
lusc_k_fold	somatic mutation (SNP and INDEL)	_mc3_gene_level_	DL	CNN_LSTM	macro	0.23	0.17	0.23	0.17	0.74
lusc_k_fold	somatic mutation (SNP and INDEL)	_mc3_gene_level_	DL		micro	0.28	0.28	0.28	0.28	0.76
lusc_k_fold	somatic mutation (SNP and INDEL)	_mc3_gene_level_	DL		weighted	0.28	0.21	0.28	0.2	0.68
lusc_k_fold	somatic mutation (SNP and INDEL)	_mc3_gene_level_	DL	RESNET101	macro	0.32	0.2	0.32	0.23	0.78
lusc_k_fold	somatic mutation (SNP and INDEL)	_mc3_gene_level_	DL		micro	0.4	0.4	0.4	0.4	0.8
lusc_k_fold	somatic mutation (SNP and INDEL)	_mc3_gene_level_	DL		weighted	0.4	0.25	0.4	0.29	0.71
lusc_k_fold	somatic mutation (SNP and INDEL)	_mc3_gene_level_	DL	DENSENET161	macro	0.24	0.09	0.24	0.12	0.75
lusc_k_fold	somatic mutation (SNP and INDEL)	_mc3_gene_level_	DL		micro	0.3	0.3	0.3	0.3	0.77
lusc_k_fold	somatic mutation (SNP and INDEL)	_mc3_gene_level_	DL		weighted	0.3	0.11	0.3	0.15	0.69
lusc_k_fold	somatic mutation (SNP and INDEL)	_mc3_gene_level_	DL	LSTM	macro	0.24	0.14	0.24	0.14	0.75
lusc_k_fold	somatic mutation (SNP and INDEL)	_mc3_gene_level_	DL		micro	0.35	0.35	0.35	0.35	0.78
lusc_k_fold	somatic mutation (SNP and INDEL)	_mc3_gene_level_	DL		weighted	0.35	0.17	0.35	0.2	0.64
lusc_k_fold	somatic mutation (SNP and INDEL)	_mc3_gene_level_	DL	RESNET50	macro	0.26	0.2	0.26	0.2	0.76
lusc_k_fold	somatic mutation (SNP and INDEL)	_mc3_gene_level_	DL		micro	0.35	0.35	0.35	0.35	0.78
lusc_k_fold	somatic mutation (SNP and INDEL)	_mc3_gene_level_	DL		weighted	0.35	0.24	0.35	0.26	0.68
lusc_k_fold	somatic mutation (SNP and INDEL)	_mc3_gene_level_	DL	RNN	macro	0.28	0.3	0.28	0.26	0.76
lusc_k_fold	somatic mutation (SNP and INDEL)	_mc3_gene_level_	DL		micro	0.33	0.33	0.33	0.33	0.78
lusc_k_fold	somatic mutation (SNP and INDEL)	_mc3_gene_level_	DL		weighted	0.33	0.31	0.33	0.29	0.69
lusc_k_fold	somatic mutation (SNP and INDEL)	_mc3_gene_level_	DL	CNN_GRU	macro	0.25	0.19	0.25	0.18	0.75
lusc_k_fold	somatic mutation (SNP and INDEL)	_mc3_gene_level_	DL		micro	0.32	0.32	0.32	0.32	0.77
lusc_k_fold	somatic mutation (SNP and INDEL)	_mc3_gene_level_	DL		weighted	0.32	0.22	0.32	0.22	0.68
lusc_k_fold	somatic mutation (SNP and INDEL)	_mc3_gene_level_	DL	RESNET18	macro	0.25	0.17	0.25	0.15	0.75
lusc_k_fold	somatic mutation (SNP and INDEL)	_mc3_gene_level_	DL		micro	0.27	0.27	0.27	0.27	0.76
lusc_k_fold	somatic mutation (SNP and INDEL)	_mc3_gene_level_	DL		weighted	0.27	0.21	0.27	0.17	0.74
lusc_k_fold	somatic mutation (SNP and INDEL)	_mc3_gene_level_	DL	NN	macro	0.27	0.32	0.27	0.26	0.76
lusc_k_fold	somatic mutation (SNP and INDEL)	_mc3_gene_level_	DL		micro	0.31	0.31	0.31	0.31	0.77
lusc_k_fold	somatic mutation (SNP and INDEL)	_mc3_gene_level_	DL		weighted	0.31	0.34	0.31	0.3	0.71
lusc_k_fold	somatic mutation (SNP and INDEL)	_mc3_gene_level_	DL	DENSENET201	macro	0.24	0.12	0.24	0.13	0.75
lusc_k_fold	somatic mutation (SNP and INDEL)	_mc3_gene_level_	DL		micro	0.27	0.27	0.27	0.27	0.76
lusc_k_fold	somatic mutation (SNP and INDEL)	_mc3_gene_level_	DL		weighted	0.27	0.13	0.27	0.15	0.71
lusc_k_fold	somatic mutation (SNP and INDEL)	_mc3_gene_level_	DL	GRU	macro	0.25	0.26	0.25	0.19	0.75
lusc_k_fold	somatic mutation (SNP and INDEL)	_mc3_gene_level_	DL		micro	0.34	0.34	0.34	0.34	0.78
lusc_k_fold	somatic mutation (SNP and INDEL)	_mc3_gene_level_	DL		weighted	0.34	0.3	0.34	0.24	0.66
lusc_k_fold	somatic mutation (SNP and INDEL)	_mc3_gene_level_	DL	DENSENET264	macro	0.24	0.11	0.24	0.13	0.75
lusc_k_fold	somatic mutation (SNP and INDEL)	_mc3_gene_level_	DL		micro	0.31	0.31	0.31	0.31	0.77
lusc_k_fold	somatic mutation (SNP and INDEL)	_mc3_gene_level_	DL		weighted	0.31	0.14	0.31	0.18	0.68
lusc_k_fold	somatic mutation (SNP and INDEL)	_mc3_gene_level_	DL	RESNET152	macro	0.27	0.13	0.27	0.16	0.76
lusc_k_fold	somatic mutation (SNP and INDEL)	_mc3_gene_level_	DL		micro	0.34	0.34	0.34	0.34	0.78
lusc_k_fold	somatic mutation (SNP and INDEL)	_mc3_gene_level_	DL		weighted	0.34	0.16	0.34	0.2	0.69
lusc_k_fold	somatic mutation (SNP and INDEL)	_mc3_gene_level_	DL	DENSENET169	macro	0.25	0.14	0.25	0.13	0.75
lusc_k_fold	somatic mutation (SNP and INDEL)	_mc3_gene_level_	DL		micro	0.25	0.25	0.25	0.25	0.75
lusc_k_fold	somatic mutation (SNP and INDEL)	_mc3_gene_level_	DL		weighted	0.25	0.16	0.25	0.14	0.76
lusc_k_fold	somatic mutation (SNP and INDEL)	_mc3_gene_level_	DL	CNN_RNN	macro	0.23	0.16	0.23	0.18	0.74
lusc_k_fold	somatic mutation (SNP and INDEL)	_mc3_gene_level_	DL		micro	0.28	0.28	0.28	0.28	0.76
lusc_k_fold	somatic mutation (SNP and INDEL)	_mc3_gene_level_	DL		weighted	0.28	0.2	0.28	0.21	0.69
lusc_k_fold	somatic mutation (SNP and INDEL)	_mc3_gene_level_	DL	DENSENET121	macro	0.27	0.11	0.27	0.15	0.76
lusc_k_fold	somatic mutation (SNP and INDEL)	_mc3_gene_level_	DL		micro	0.33	0.33	0.33	0.33	0.78
lusc_k_fold	somatic mutation (SNP and INDEL)	_mc3_gene_level_	DL		weighted	0.33	0.13	0.33	0.18	0.7
lusc_k_fold	somatic mutation (SNP and INDEL)	_mc3_gene_level_	ML	LIGHTGBM	macro	0.25	0.09	0.25	0.13	0.75
lusc_k_fold	somatic mutation (SNP and INDEL)	_mc3_gene_level_	ML		micro	0.36	0.36	0.36	0.36	0.79
lusc_k_fold	somatic mutation (SNP and INDEL)	_mc3_gene_level_	ML		weighted	0.36	0.13	0.36	0.19	0.64
lusc_k_fold	somatic mutation (SNP and INDEL)	_mc3_gene_level_	ML	GAUSSIAN_NB	macro	0.23	0.16	0.23	0.15	0.74
lusc_k_fold	somatic mutation (SNP and INDEL)	_mc3_gene_level_	ML		micro	0.27	0.27	0.27	0.27	0.76
lusc_k_fold	somatic mutation (SNP and INDEL)	_mc3_gene_level_	ML		weighted	0.27	0.19	0.27	0.18	0.7
lusc_k_fold	somatic mutation (SNP and INDEL)	_mc3_gene_level_	ML	K_NEIGHBORS	macro	0.23	0.15	0.23	0.14	0.75
lusc_k_fold	somatic mutation (SNP and INDEL)	_mc3_gene_level_	ML		micro	0.26	0.26	0.26	0.26	0.75
lusc_k_fold	somatic mutation (SNP and INDEL)	_mc3_gene_level_	ML		weighted	0.26	0.18	0.26	0.17	0.72
lusc_k_fold	somatic mutation (SNP and INDEL)	_mc3_gene_level_	ML	HISTGBOOST	macro	0.23	0.22	0.23	0.22	0.75
lusc_k_fold	somatic mutation (SNP and INDEL)	_mc3_gene_level_	ML		micro	0.26	0.26	0.26	0.26	0.75
lusc_k_fold	somatic mutation (SNP and INDEL)	_mc3_gene_level_	ML		weighted	0.26	0.25	0.26	0.25	0.73
lusc_k_fold	somatic mutation (SNP and INDEL)	_mc3_gene_level_	ML	CATBOOST	macro	0.25	0.09	0.25	0.13	0.75
lusc_k_fold	somatic mutation (SNP and INDEL)	_mc3_gene_level_	ML		micro	0.36	0.36	0.36	0.36	0.79
lusc_k_fold	somatic mutation (SNP and INDEL)	_mc3_gene_level_	ML		weighted	0.36	0.13	0.36	0.19	0.64
lusc_k_fold	somatic mutation (SNP and INDEL)	_mc3_gene_level_	ML	SVM_LINEAR	macro	0.27	0.22	0.27	0.18	0.76
lusc_k_fold	somatic mutation (SNP and INDEL)	_mc3_gene_level_	ML		micro	0.38	0.38	0.38	0.38	0.79
lusc_k_fold	somatic mutation (SNP and INDEL)	_mc3_gene_level_	ML		weighted	0.38	0.26	0.38	0.24	0.66
lusc_k_fold	somatic mutation (SNP and INDEL)	_mc3_gene_level_	ML	BERNOULLI_NB	macro	0.26	0.14	0.26	0.15	0.75
lusc_k_fold	somatic mutation (SNP and INDEL)	_mc3_gene_level_	ML		micro	0.37	0.37	0.37	0.37	0.79
lusc_k_fold	somatic mutation (SNP and INDEL)	_mc3_gene_level_	ML		weighted	0.37	0.18	0.37	0.21	0.64
lusc_k_fold	somatic mutation (SNP and INDEL)	_mc3_gene_level_	ML	LOGISTIC_REGRESSION	macro	0.28	0.27	0.28	0.21	0.77
lusc_k_fold	somatic mutation (SNP and INDEL)	_mc3_gene_level_	ML		micro	0.39	0.39	0.39	0.39	0.8
lusc_k_fold	somatic mutation (SNP and INDEL)	_mc3_gene_level_	ML		weighted	0.39	0.32	0.39	0.27	0.67
lusc_k_fold	somatic mutation (SNP and INDEL)	_mc3_gene_level_	ML	ADA_BOOST	macro	0.25	0.22	0.25	0.2	0.76
lusc_k_fold	somatic mutation (SNP and INDEL)	_mc3_gene_level_	ML		micro	0.33	0.33	0.33	0.33	0.78
lusc_k_fold	somatic mutation (SNP and INDEL)	_mc3_gene_level_	ML		weighted	0.33	0.26	0.33	0.26	0.69
lusc_k_fold	somatic mutation (SNP and INDEL)	_mc3_gene_level_	ML	GBOOST	macro	0.25	0.09	0.25	0.13	0.75
lusc_k_fold	somatic mutation (SNP and INDEL)	_mc3_gene_level_	ML		micro	0.36	0.36	0.36	0.36	0.79
lusc_k_fold	somatic mutation (SNP and INDEL)	_mc3_gene_level_	ML		weighted	0.36	0.13	0.36	0.19	0.64
lusc_k_fold	somatic mutation (SNP and INDEL)	_mc3_gene_level_	ML	XGBOOST	macro	0.27	0.27	0.27	0.26	0.76
lusc_k_fold	somatic mutation (SNP and INDEL)	_mc3_gene_level_	ML		micro	0.31	0.31	0.31	0.31	0.77
lusc_k_fold	somatic mutation (SNP and INDEL)	_mc3_gene_level_	ML		weighted	0.31	0.3	0.31	0.3	0.74
lusc_k_fold	somatic mutation (SNP and INDEL)	_mc3_gene_level_	ML	QUADRATIC_DISCRIMINANT	macro	0.24	0.13	0.24	0.16	0.75
lusc_k_fold	somatic mutation (SNP and INDEL)	_mc3_gene_level_	ML		micro	0.34	0.34	0.34	0.34	0.78
lusc_k_fold	somatic mutation (SNP and INDEL)	_mc3_gene_level_	ML		weighted	0.34	0.17	0.34	0.22	0.66
lusc_k_fold	somatic mutation (SNP and INDEL)	_mc3_gene_level_	ML	MLP	macro	0.26	0.23	0.26	0.19	0.75
lusc_k_fold	somatic mutation (SNP and INDEL)	_mc3_gene_level_	ML		micro	0.35	0.35	0.35	0.35	0.78
lusc_k_fold	somatic mutation (SNP and INDEL)	_mc3_gene_level_	ML		weighted	0.35	0.27	0.35	0.25	0.65
lusc_k_fold	somatic mutation (SNP and INDEL)	_mc3_gene_level_	ML	COMPLEMENT_NB	macro	0.27	0.2	0.27	0.2	0.76
lusc_k_fold	somatic mutation (SNP and INDEL)	_mc3_gene_level_	ML		micro	0.33	0.33	0.33	0.33	0.78
lusc_k_fold	somatic mutation (SNP and INDEL)	_mc3_gene_level_	ML		weighted	0.33	0.24	0.33	0.25	0.69
lusc_k_fold	somatic mutation (SNP and INDEL)	_mc3_gene_level_	ML	RANDOM_FOREST	macro	0.28	0.22	0.28	0.18	0.76
lusc_k_fold	somatic mutation (SNP and INDEL)	_mc3_gene_level_	ML		micro	0.39	0.39	0.39	0.39	0.8
lusc_k_fold	somatic mutation (SNP and INDEL)	_mc3_gene_level_	ML		weighted	0.39	0.26	0.39	0.25	0.66
lusc_k_fold	somatic mutation (SNP and INDEL)	_mc3_gene_level_	ML	DECISION_TREE	macro	0.3	0.31	0.3	0.29	0.78
lusc_k_fold	somatic mutation (SNP and INDEL)	_mc3_gene_level_	ML		micro	0.34	0.34	0.34	0.34	0.78
lusc_k_fold	somatic mutation (SNP and INDEL)	_mc3_gene_level_	ML		weighted	0.34	0.37	0.34	0.34	0.78
lusc_k_fold	miRNA mature strand expression RNAseq	miRNA_GA_gene	DL	DEEPGENE	macro	0.262	0.118	0.262	0.158	0.757
lusc_k_fold	miRNA mature strand expression RNAseq	miRNA_GA_gene	DL		micro	0.4	0.4	0.4	0.4	0.8
lusc_k_fold	miRNA mature strand expression RNAseq	miRNA_GA_gene	DL		weighted	0.4	0.176	0.4	0.239	0.629
lusc_k_fold	miRNA mature strand expression RNAseq	miRNA_GA_gene	DL	CNN	macro	0.396	0.326	0.396	0.312	0.823
lusc_k_fold	miRNA mature strand expression RNAseq	miRNA_GA_gene	DL		micro	0.553	0.553	0.553	0.553	0.851
lusc_k_fold	miRNA mature strand expression RNAseq	miRNA_GA_gene	DL		weighted	0.553	0.439	0.553	0.433	0.739
lusc_k_fold	miRNA mature strand expression RNAseq	miRNA_GA_gene	DL	RESNET34	macro	0.591	0.57	0.591	0.553	0.87
lusc_k_fold	miRNA mature strand expression RNAseq	miRNA_GA_gene	DL		micro	0.638	0.638	0.638	0.638	0.879
lusc_k_fold	miRNA mature strand expression RNAseq	miRNA_GA_gene	DL		weighted	0.638	0.615	0.638	0.603	0.843
lusc_k_fold	miRNA mature strand expression RNAseq	miRNA_GA_gene	DL	CNN_LSTM	macro	0.25	0.103	0.25	0.146	0.75
lusc_k_fold	miRNA mature strand expression RNAseq	miRNA_GA_gene	DL		micro	0.412	0.412	0.412	0.412	0.804
lusc_k_fold	miRNA mature strand expression RNAseq	miRNA_GA_gene	DL		weighted	0.412	0.17	0.412	0.24	0.588
lusc_k_fold	miRNA mature strand expression RNAseq	miRNA_GA_gene	DL	RESNET101	macro	0.416	0.403	0.416	0.355	0.824
lusc_k_fold	miRNA mature strand expression RNAseq	miRNA_GA_gene	DL		micro	0.475	0.475	0.475	0.475	0.825
lusc_k_fold	miRNA mature strand expression RNAseq	miRNA_GA_gene	DL		weighted	0.475	0.546	0.475	0.443	0.819
lusc_k_fold	miRNA mature strand expression RNAseq	miRNA_GA_gene	DL	DENSENET161	macro	0.318	0.184	0.318	0.214	0.775
lusc_k_fold	miRNA mature strand expression RNAseq	miRNA_GA_gene	DL		micro	0.4	0.4	0.4	0.4	0.8
lusc_k_fold	miRNA mature strand expression RNAseq	miRNA_GA_gene	DL		weighted	0.4	0.245	0.4	0.283	0.701
lusc_k_fold	miRNA mature strand expression RNAseq	miRNA_GA_gene	DL	LSTM	macro	0.293	0.197	0.293	0.209	0.774
lusc_k_fold	miRNA mature strand expression RNAseq	miRNA_GA_gene	DL		micro	0.459	0.459	0.459	0.459	0.82
lusc_k_fold	miRNA mature strand expression RNAseq	miRNA_GA_gene	DL		weighted	0.459	0.275	0.459	0.316	0.639
lusc_k_fold	miRNA mature strand expression RNAseq	miRNA_GA_gene	DL	RESNET50	macro	0.44	0.415	0.44	0.39	0.825
lusc_k_fold	miRNA mature strand expression RNAseq	miRNA_GA_gene	DL		micro	0.525	0.525	0.525	0.525	0.842
lusc_k_fold	miRNA mature strand expression RNAseq	miRNA_GA_gene	DL		weighted	0.525	0.46	0.525	0.45	0.775
lusc_k_fold	miRNA mature strand expression RNAseq	miRNA_GA_gene	DL	RNN	macro	0.515	0.485	0.515	0.465	0.859
lusc_k_fold	miRNA mature strand expression RNAseq	miRNA_GA_gene	DL		micro	0.625	0.625	0.625	0.625	0.875
lusc_k_fold	miRNA mature strand expression RNAseq	miRNA_GA_gene	DL		weighted	0.625	0.567	0.625	0.561	0.811
lusc_k_fold	miRNA mature strand expression RNAseq	miRNA_GA_gene	DL	CNN_GRU	macro	0.25	0.103	0.25	0.146	0.75
lusc_k_fold	miRNA mature strand expression RNAseq	miRNA_GA_gene	DL		micro	0.412	0.412	0.412	0.412	0.804
lusc_k_fold	miRNA mature strand expression RNAseq	miRNA_GA_gene	DL		weighted	0.412	0.17	0.412	0.24	0.588
lusc_k_fold	miRNA mature strand expression RNAseq	miRNA_GA_gene	DL	RESNET18	macro	0.562	0.523	0.562	0.523	0.881
lusc_k_fold	miRNA mature strand expression RNAseq	miRNA_GA_gene	DL		micro	0.688	0.688	0.688	0.688	0.896
lusc_k_fold	miRNA mature strand expression RNAseq	miRNA_GA_gene	DL		weighted	0.688	0.615	0.688	0.632	0.837
lusc_k_fold	miRNA mature strand expression RNAseq	miRNA_GA_gene	DL	NN	macro	0.407	0.393	0.407	0.375	0.82
lusc_k_fold	miRNA mature strand expression RNAseq	miRNA_GA_gene	DL		micro	0.518	0.518	0.518	0.518	0.839
lusc_k_fold	miRNA mature strand expression RNAseq	miRNA_GA_gene	DL		weighted	0.518	0.467	0.518	0.466	0.763
lusc_k_fold	miRNA mature strand expression RNAseq	miRNA_GA_gene	DL	DENSENET201	macro	0.336	0.217	0.336	0.254	0.786
lusc_k_fold	miRNA mature strand expression RNAseq	miRNA_GA_gene	DL		micro	0.438	0.438	0.438	0.438	0.812
lusc_k_fold	miRNA mature strand expression RNAseq	miRNA_GA_gene	DL		weighted	0.438	0.283	0.438	0.331	0.706
lusc_k_fold	miRNA mature strand expression RNAseq	miRNA_GA_gene	DL	GRU	macro	0.419	0.3	0.419	0.338	0.836
lusc_k_fold	miRNA mature strand expression RNAseq	miRNA_GA_gene	DL		micro	0.576	0.576	0.576	0.576	0.859
lusc_k_fold	miRNA mature strand expression RNAseq	miRNA_GA_gene	DL		weighted	0.576	0.417	0.576	0.47	0.766
lusc_k_fold	miRNA mature strand expression RNAseq	miRNA_GA_gene	DL	DENSENET264	macro	0.301	0.224	0.301	0.227	0.775
lusc_k_fold	miRNA mature strand expression RNAseq	miRNA_GA_gene	DL		micro	0.362	0.362	0.362	0.362	0.788
lusc_k_fold	miRNA mature strand expression RNAseq	miRNA_GA_gene	DL		weighted	0.362	0.31	0.362	0.299	0.737
lusc_k_fold	miRNA mature strand expression RNAseq	miRNA_GA_gene	DL	RESNET152	macro	0.444	0.491	0.444	0.432	0.826
lusc_k_fold	miRNA mature strand expression RNAseq	miRNA_GA_gene	DL		micro	0.55	0.55	0.55	0.55	0.85
lusc_k_fold	miRNA mature strand expression RNAseq	miRNA_GA_gene	DL		weighted	0.55	0.537	0.55	0.505	0.755
lusc_k_fold	miRNA mature strand expression RNAseq	miRNA_GA_gene	DL	DENSENET169	macro	0.336	0.243	0.336	0.259	0.793
lusc_k_fold	miRNA mature strand expression RNAseq	miRNA_GA_gene	DL		micro	0.488	0.488	0.488	0.488	0.829
lusc_k_fold	miRNA mature strand expression RNAseq	miRNA_GA_gene	DL		weighted	0.488	0.32	0.488	0.362	0.685
lusc_k_fold	miRNA mature strand expression RNAseq	miRNA_GA_gene	DL	CNN_RNN	macro	0.25	0.103	0.25	0.146	0.75
lusc_k_fold	miRNA mature strand expression RNAseq	miRNA_GA_gene	DL		micro	0.412	0.412	0.412	0.412	0.804
lusc_k_fold	miRNA mature strand expression RNAseq	miRNA_GA_gene	DL		weighted	0.412	0.17	0.412	0.24	0.588
lusc_k_fold	miRNA mature strand expression RNAseq	miRNA_GA_gene	DL	DENSENET121	macro	0.218	0.185	0.218	0.18	0.739
lusc_k_fold	miRNA mature strand expression RNAseq	miRNA_GA_gene	DL		micro	0.275	0.275	0.275	0.275	0.758
lusc_k_fold	miRNA mature strand expression RNAseq	miRNA_GA_gene	DL		weighted	0.275	0.216	0.275	0.223	0.68
lusc_k_fold	miRNA mature strand expression RNAseq	miRNA_GA_gene	ML	LIGHTGBM	macro	0.25	0.1	0.25	0.15	0.75
lusc_k_fold	miRNA mature strand expression RNAseq	miRNA_GA_gene	ML		micro	0.41	0.41	0.41	0.41	0.8
lusc_k_fold	miRNA mature strand expression RNAseq	miRNA_GA_gene	ML		weighted	0.41	0.17	0.41	0.24	0.59
lusc_k_fold	miRNA mature strand expression RNAseq	miRNA_GA_gene	ML	GAUSSIAN_NB	macro	0.26	0.18	0.26	0.2	0.77
lusc_k_fold	miRNA mature strand expression RNAseq	miRNA_GA_gene	ML		micro	0.41	0.41	0.41	0.41	0.8
lusc_k_fold	miRNA mature strand expression RNAseq	miRNA_GA_gene	ML		weighted	0.41	0.26	0.41	0.3	0.65
lusc_k_fold	miRNA mature strand expression RNAseq	miRNA_GA_gene	ML	K_NEIGHBORS	macro	0.39	0.28	0.39	0.32	0.83
lusc_k_fold	miRNA mature strand expression RNAseq	miRNA_GA_gene	ML		micro	0.52	0.52	0.52	0.52	0.84
lusc_k_fold	miRNA mature strand expression RNAseq	miRNA_GA_gene	ML		weighted	0.52	0.4	0.52	0.44	0.78
lusc_k_fold	miRNA mature strand expression RNAseq	miRNA_GA_gene	ML	HISTGBOOST	macro	0.49	0.46	0.49	0.46	0.86
lusc_k_fold	miRNA mature strand expression RNAseq	miRNA_GA_gene	ML		micro	0.61	0.61	0.61	0.61	0.87
lusc_k_fold	miRNA mature strand expression RNAseq	miRNA_GA_gene	ML		weighted	0.61	0.53	0.61	0.55	0.81
lusc_k_fold	miRNA mature strand expression RNAseq	miRNA_GA_gene	ML	CATBOOST	macro	0.33	0.24	0.33	0.26	0.79
lusc_k_fold	miRNA mature strand expression RNAseq	miRNA_GA_gene	ML		micro	0.49	0.49	0.49	0.49	0.83
lusc_k_fold	miRNA mature strand expression RNAseq	miRNA_GA_gene	ML		weighted	0.49	0.32	0.49	0.37	0.67
lusc_k_fold	miRNA mature strand expression RNAseq	miRNA_GA_gene	ML	SVM_LINEAR	macro	0.6	0.54	0.6	0.56	0.88
lusc_k_fold	miRNA mature strand expression RNAseq	miRNA_GA_gene	ML		micro	0.68	0.68	0.68	0.68	0.89
lusc_k_fold	miRNA mature strand expression RNAseq	miRNA_GA_gene	ML		weighted	0.68	0.62	0.68	0.64	0.85
lusc_k_fold	miRNA mature strand expression RNAseq	miRNA_GA_gene	ML	BERNOULLI_NB	macro	0.33	0.2	0.33	0.25	0.8
lusc_k_fold	miRNA mature strand expression RNAseq	miRNA_GA_gene	ML		micro	0.48	0.48	0.48	0.48	0.83
lusc_k_fold	miRNA mature strand expression RNAseq	miRNA_GA_gene	ML		weighted	0.48	0.29	0.48	0.36	0.7
lusc_k_fold	miRNA mature strand expression RNAseq	miRNA_GA_gene	ML	LOGISTIC_REGRESSION	macro	0.66	0.71	0.66	0.65	0.9
lusc_k_fold	miRNA mature strand expression RNAseq	miRNA_GA_gene	ML		micro	0.74	0.74	0.74	0.74	0.91
lusc_k_fold	miRNA mature strand expression RNAseq	miRNA_GA_gene	ML		weighted	0.74	0.76	0.74	0.72	0.87
lusc_k_fold	miRNA mature strand expression RNAseq	miRNA_GA_gene	ML	ADA_BOOST	macro	0.41	0.41	0.41	0.38	0.81
lusc_k_fold	miRNA mature strand expression RNAseq	miRNA_GA_gene	ML		micro	0.49	0.49	0.49	0.49	0.83
lusc_k_fold	miRNA mature strand expression RNAseq	miRNA_GA_gene	ML		weighted	0.49	0.46	0.49	0.45	0.75
lusc_k_fold	miRNA mature strand expression RNAseq	miRNA_GA_gene	ML	GBOOST	macro	0.25	0.1	0.25	0.15	0.75
lusc_k_fold	miRNA mature strand expression RNAseq	miRNA_GA_gene	ML		micro	0.41	0.41	0.41	0.41	0.8
lusc_k_fold	miRNA mature strand expression RNAseq	miRNA_GA_gene	ML		weighted	0.41	0.17	0.41	0.24	0.59
lusc_k_fold	miRNA mature strand expression RNAseq	miRNA_GA_gene	ML	XGBOOST	macro	0.53	0.5	0.53	0.5	0.86
lusc_k_fold	miRNA mature strand expression RNAseq	miRNA_GA_gene	ML		micro	0.64	0.64	0.64	0.64	0.88
lusc_k_fold	miRNA mature strand expression RNAseq	miRNA_GA_gene	ML		weighted	0.64	0.58	0.64	0.59	0.82
lusc_k_fold	miRNA mature strand expression RNAseq	miRNA_GA_gene	ML	QUADRATIC_DISCRIMINANT	macro	0.32	0.27	0.32	0.28	0.76
lusc_k_fold	miRNA mature strand expression RNAseq	miRNA_GA_gene	ML		micro	0.29	0.29	0.29	0.29	0.76
lusc_k_fold	miRNA mature strand expression RNAseq	miRNA_GA_gene	ML		weighted	0.29	0.29	0.29	0.28	0.74
lusc_k_fold	miRNA mature strand expression RNAseq	miRNA_GA_gene	ML	MLP	macro	0.53	0.51	0.53	0.49	0.87
lusc_k_fold	miRNA mature strand expression RNAseq	miRNA_GA_gene	ML		micro	0.65	0.65	0.65	0.65	0.88
lusc_k_fold	miRNA mature strand expression RNAseq	miRNA_GA_gene	ML		weighted	0.65	0.58	0.65	0.59	0.82
lusc_k_fold	miRNA mature strand expression RNAseq	miRNA_GA_gene	ML	COMPLEMENT_NB	macro	0.45	0.43	0.45	0.41	0.84
lusc_k_fold	miRNA mature strand expression RNAseq	miRNA_GA_gene	ML		micro	0.59	0.59	0.59	0.59	0.86
lusc_k_fold	miRNA mature strand expression RNAseq	miRNA_GA_gene	ML		weighted	0.59	0.51	0.59	0.51	0.78
lusc_k_fold	miRNA mature strand expression RNAseq	miRNA_GA_gene	ML	RANDOM_FOREST	macro	0.39	0.35	0.39	0.34	0.82
lusc_k_fold	miRNA mature strand expression RNAseq	miRNA_GA_gene	ML		micro	0.54	0.54	0.54	0.54	0.85
lusc_k_fold	miRNA mature strand expression RNAseq	miRNA_GA_gene	ML		weighted	0.54	0.42	0.54	0.44	0.73
lusc_k_fold	miRNA mature strand expression RNAseq	miRNA_GA_gene	ML	DECISION_TREE	macro	0.28	0.23	0.28	0.25	0.77
lusc_k_fold	miRNA mature strand expression RNAseq	miRNA_GA_gene	ML		micro	0.36	0.36	0.36	0.36	0.79
lusc_k_fold	miRNA mature strand expression RNAseq	miRNA_GA_gene	ML		weighted	0.36	0.31	0.36	0.33	0.7
lusc_k_fold	protein expression RPPA	RPPA_RBN_	DL	DEEPGENE	macro	0.445	0.506	0.445	0.428	0.81
lusc_k_fold	protein expression RPPA	RPPA_RBN_	DL		micro	0.442	0.442	0.442	0.442	0.814
lusc_k_fold	protein expression RPPA	RPPA_RBN_	DL		weighted	0.442	0.501	0.442	0.424	0.799
lusc_k_fold	protein expression RPPA	RPPA_RBN_	DL	CNN	macro	0.51	0.56	0.51	0.49	0.83
lusc_k_fold	protein expression RPPA	RPPA_RBN_	DL		micro	0.51	0.51	0.51	0.51	0.84
lusc_k_fold	protein expression RPPA	RPPA_RBN_	DL		weighted	0.51	0.58	0.51	0.5	0.83
lusc_k_fold	protein expression RPPA	RPPA_RBN_	DL	RESNET34	macro	0.38	0.38	0.38	0.34	0.79
lusc_k_fold	protein expression RPPA	RPPA_RBN_	DL		micro	0.37	0.37	0.37	0.37	0.79
lusc_k_fold	protein expression RPPA	RPPA_RBN_	DL		weighted	0.37	0.39	0.37	0.34	0.78
lusc_k_fold	protein expression RPPA	RPPA_RBN_	DL	CNN_LSTM	macro	0.47	0.53	0.47	0.44	0.82
lusc_k_fold	protein expression RPPA	RPPA_RBN_	DL		micro	0.48	0.48	0.48	0.48	0.83
lusc_k_fold	protein expression RPPA	RPPA_RBN_	DL		weighted	0.48	0.54	0.48	0.45	0.81
lusc_k_fold	protein expression RPPA	RPPA_RBN_	DL	RESNET101	macro	0.28	0.22	0.28	0.24	0.76
lusc_k_fold	protein expression RPPA	RPPA_RBN_	DL		micro	0.31	0.31	0.31	0.31	0.77
lusc_k_fold	protein expression RPPA	RPPA_RBN_	DL		weighted	0.31	0.25	0.31	0.26	0.73
lusc_k_fold	protein expression RPPA	RPPA_RBN_	DL	DENSENET161	macro	0.26	0.18	0.26	0.2	0.76
lusc_k_fold	protein expression RPPA	RPPA_RBN_	DL		micro	0.3	0.3	0.3	0.3	0.77
lusc_k_fold	protein expression RPPA	RPPA_RBN_	DL		weighted	0.3	0.21	0.3	0.23	0.73
lusc_k_fold	protein expression RPPA	RPPA_RBN_	DL	LSTM	macro	0.39	0.34	0.39	0.32	0.8
lusc_k_fold	protein expression RPPA	RPPA_RBN_	DL		micro	0.44	0.44	0.44	0.44	0.81
lusc_k_fold	protein expression RPPA	RPPA_RBN_	DL		weighted	0.44	0.36	0.44	0.35	0.75
lusc_k_fold	protein expression RPPA	RPPA_RBN_	DL	RESNET50	macro	0.35	0.4	0.35	0.34	0.78
lusc_k_fold	protein expression RPPA	RPPA_RBN_	DL		micro	0.38	0.38	0.38	0.38	0.79
lusc_k_fold	protein expression RPPA	RPPA_RBN_	DL		weighted	0.38	0.4	0.38	0.35	0.76
lusc_k_fold	protein expression RPPA	RPPA_RBN_	DL	RNN	macro	0.49	0.5	0.49	0.47	0.83
lusc_k_fold	protein expression RPPA	RPPA_RBN_	DL		micro	0.5	0.5	0.5	0.5	0.83
lusc_k_fold	protein expression RPPA	RPPA_RBN_	DL		weighted	0.5	0.51	0.5	0.49	0.81
lusc_k_fold	protein expression RPPA	RPPA_RBN_	DL	CNN_GRU	macro	0.43	0.45	0.43	0.4	0.81
lusc_k_fold	protein expression RPPA	RPPA_RBN_	DL		micro	0.46	0.46	0.46	0.46	0.82
lusc_k_fold	protein expression RPPA	RPPA_RBN_	DL		weighted	0.46	0.46	0.46	0.42	0.79
lusc_k_fold	protein expression RPPA	RPPA_RBN_	DL	RESNET18	macro	0.41	0.46	0.41	0.38	0.79
lusc_k_fold	protein expression RPPA	RPPA_RBN_	DL		micro	0.41	0.41	0.41	0.41	0.8
lusc_k_fold	protein expression RPPA	RPPA_RBN_	DL		weighted	0.41	0.46	0.41	0.38	0.77
lusc_k_fold	protein expression RPPA	RPPA_RBN_	DL	NN	macro	0.47	0.41	0.47	0.4	0.83
lusc_k_fold	protein expression RPPA	RPPA_RBN_	DL		micro	0.52	0.52	0.52	0.52	0.84
lusc_k_fold	protein expression RPPA	RPPA_RBN_	DL		weighted	0.52	0.43	0.52	0.43	0.8
lusc_k_fold	protein expression RPPA	RPPA_RBN_	DL	DENSENET201	macro	0.27	0.19	0.27	0.2	0.75
lusc_k_fold	protein expression RPPA	RPPA_RBN_	DL		micro	0.3	0.3	0.3	0.3	0.77
lusc_k_fold	protein expression RPPA	RPPA_RBN_	DL		weighted	0.3	0.2	0.3	0.22	0.72
lusc_k_fold	protein expression RPPA	RPPA_RBN_	DL	GRU	macro	0.44	0.41	0.44	0.37	0.82
lusc_k_fold	protein expression RPPA	RPPA_RBN_	DL		micro	0.5	0.5	0.5	0.5	0.83
lusc_k_fold	protein expression RPPA	RPPA_RBN_	DL		weighted	0.5	0.45	0.5	0.42	0.79
lusc_k_fold	protein expression RPPA	RPPA_RBN_	DL	DENSENET264	macro	0.31	0.22	0.31	0.24	0.77
lusc_k_fold	protein expression RPPA	RPPA_RBN_	DL		micro	0.36	0.36	0.36	0.36	0.79
lusc_k_fold	protein expression RPPA	RPPA_RBN_	DL		weighted	0.36	0.24	0.36	0.27	0.72
lusc_k_fold	protein expression RPPA	RPPA_RBN_	DL	RESNET152	macro	0.27	0.29	0.27	0.25	0.76
lusc_k_fold	protein expression RPPA	RPPA_RBN_	DL		micro	0.28	0.28	0.28	0.28	0.76
lusc_k_fold	protein expression RPPA	RPPA_RBN_	DL		weighted	0.28	0.3	0.28	0.26	0.74
lusc_k_fold	protein expression RPPA	RPPA_RBN_	DL	DENSENET169	macro	0.26	0.19	0.26	0.2	0.76
lusc_k_fold	protein expression RPPA	RPPA_RBN_	DL		micro	0.28	0.28	0.28	0.28	0.76
lusc_k_fold	protein expression RPPA	RPPA_RBN_	DL		weighted	0.28	0.22	0.28	0.22	0.74
lusc_k_fold	protein expression RPPA	RPPA_RBN_	DL	CNN_RNN	macro	0.47	0.49	0.47	0.43	0.82
lusc_k_fold	protein expression RPPA	RPPA_RBN_	DL		micro	0.47	0.47	0.47	0.47	0.82
lusc_k_fold	protein expression RPPA	RPPA_RBN_	DL		weighted	0.47	0.49	0.47	0.43	0.81
lusc_k_fold	protein expression RPPA	RPPA_RBN_	DL	DENSENET121	macro	0.31	0.34	0.31	0.28	0.77
lusc_k_fold	protein expression RPPA	RPPA_RBN_	DL		micro	0.32	0.32	0.32	0.32	0.77
lusc_k_fold	protein expression RPPA	RPPA_RBN_	DL		weighted	0.32	0.35	0.32	0.28	0.76
lusc_k_fold	protein expression RPPA	RPPA_RBN_	ML	LIGHTGBM	macro	0.25	0.08	0.25	0.13	0.75
lusc_k_fold	protein expression RPPA	RPPA_RBN_	ML		micro	0.34	0.34	0.34	0.34	0.78
lusc_k_fold	protein expression RPPA	RPPA_RBN_	ML		weighted	0.34	0.11	0.34	0.17	0.66
lusc_k_fold	protein expression RPPA	RPPA_RBN_	ML	GAUSSIAN_NB	macro	0.53	0.51	0.53	0.51	0.84
lusc_k_fold	protein expression RPPA	RPPA_RBN_	ML		micro	0.53	0.53	0.53	0.53	0.84
lusc_k_fold	protein expression RPPA	RPPA_RBN_	ML		weighted	0.53	0.52	0.53	0.51	0.84
lusc_k_fold	protein expression RPPA	RPPA_RBN_	ML	K_NEIGHBORS	macro	0.42	0.43	0.42	0.39	0.81
lusc_k_fold	protein expression RPPA	RPPA_RBN_	ML		micro	0.46	0.46	0.46	0.46	0.82
lusc_k_fold	protein expression RPPA	RPPA_RBN_	ML		weighted	0.46	0.45	0.46	0.42	0.77
lusc_k_fold	protein expression RPPA	RPPA_RBN_	ML	HISTGBOOST	macro	0.53	0.58	0.53	0.54	0.84
lusc_k_fold	protein expression RPPA	RPPA_RBN_	ML		micro	0.54	0.54	0.54	0.54	0.85
lusc_k_fold	protein expression RPPA	RPPA_RBN_	ML		weighted	0.54	0.58	0.54	0.55	0.83
lusc_k_fold	protein expression RPPA	RPPA_RBN_	ML	CATBOOST	macro	0.38	0.35	0.38	0.32	0.8
lusc_k_fold	protein expression RPPA	RPPA_RBN_	ML		micro	0.44	0.44	0.44	0.44	0.81
lusc_k_fold	protein expression RPPA	RPPA_RBN_	ML		weighted	0.44	0.38	0.44	0.36	0.75
lusc_k_fold	protein expression RPPA	RPPA_RBN_	ML	SVM_LINEAR	macro	0.54	0.55	0.54	0.53	0.85
lusc_k_fold	protein expression RPPA	RPPA_RBN_	ML		micro	0.55	0.55	0.55	0.55	0.85
lusc_k_fold	protein expression RPPA	RPPA_RBN_	ML		weighted	0.55	0.57	0.55	0.54	0.84
lusc_k_fold	protein expression RPPA	RPPA_RBN_	ML	BERNOULLI_NB	macro	0.51	0.5	0.51	0.47	0.84
lusc_k_fold	protein expression RPPA	RPPA_RBN_	ML		micro	0.51	0.51	0.51	0.51	0.84
lusc_k_fold	protein expression RPPA	RPPA_RBN_	ML		weighted	0.51	0.53	0.51	0.48	0.83
lusc_k_fold	protein expression RPPA	RPPA_RBN_	ML	LOGISTIC_REGRESSION	macro	0.53	0.57	0.53	0.52	0.84
lusc_k_fold	protein expression RPPA	RPPA_RBN_	ML		micro	0.53	0.53	0.53	0.53	0.84
lusc_k_fold	protein expression RPPA	RPPA_RBN_	ML		weighted	0.53	0.58	0.53	0.52	0.83
lusc_k_fold	protein expression RPPA	RPPA_RBN_	ML	ADA_BOOST	macro	0.37	0.36	0.37	0.34	0.79
lusc_k_fold	protein expression RPPA	RPPA_RBN_	ML		micro	0.39	0.39	0.39	0.39	0.8
lusc_k_fold	protein expression RPPA	RPPA_RBN_	ML		weighted	0.39	0.38	0.39	0.35	0.76
lusc_k_fold	protein expression RPPA	RPPA_RBN_	ML	GBOOST	macro	0.31	0.29	0.31	0.24	0.77
lusc_k_fold	protein expression RPPA	RPPA_RBN_	ML		micro	0.39	0.39	0.39	0.39	0.8
lusc_k_fold	protein expression RPPA	RPPA_RBN_	ML		weighted	0.39	0.33	0.39	0.28	0.7
lusc_k_fold	protein expression RPPA	RPPA_RBN_	ML	XGBOOST	macro	0.49	0.49	0.49	0.47	0.83
lusc_k_fold	protein expression RPPA	RPPA_RBN_	ML		micro	0.5	0.5	0.5	0.5	0.83
lusc_k_fold	protein expression RPPA	RPPA_RBN_	ML		weighted	0.5	0.5	0.5	0.47	0.81
lusc_k_fold	protein expression RPPA	RPPA_RBN_	ML	QUADRATIC_DISCRIMINANT	macro	0.22	0.2	0.22	0.2	0.74
lusc_k_fold	protein expression RPPA	RPPA_RBN_	ML		micro	0.24	0.24	0.24	0.24	0.75
lusc_k_fold	protein expression RPPA	RPPA_RBN_	ML		weighted	0.24	0.23	0.24	0.22	0.73
lusc_k_fold	protein expression RPPA	RPPA_RBN_	ML	MLP	macro	0.57	0.58	0.57	0.55	0.85
lusc_k_fold	protein expression RPPA	RPPA_RBN_	ML		micro	0.55	0.55	0.55	0.55	0.85
lusc_k_fold	protein expression RPPA	RPPA_RBN_	ML		weighted	0.55	0.58	0.55	0.54	0.84
lusc_k_fold	protein expression RPPA	RPPA_RBN_	ML	RANDOM_FOREST	macro	0.51	0.51	0.51	0.48	0.84
lusc_k_fold	protein expression RPPA	RPPA_RBN_	ML		micro	0.54	0.54	0.54	0.54	0.85
lusc_k_fold	protein expression RPPA	RPPA_RBN_	ML		weighted	0.54	0.53	0.54	0.51	0.82
lusc_k_fold	protein expression RPPA	RPPA_RBN_	ML	DECISION_TREE	macro	0.43	0.41	0.43	0.4	0.8
lusc_k_fold	protein expression RPPA	RPPA_RBN_	ML		micro	0.42	0.42	0.42	0.42	0.81
lusc_k_fold	protein expression RPPA	RPPA_RBN_	ML		weighted	0.42	0.41	0.42	0.39	0.79
lusc_k_fold	protein expression RPPA	RPPA_	DL	DEEPGENE	macro	0.338	0.38	0.338	0.314	0.789
lusc_k_fold	protein expression RPPA	RPPA_	DL		micro	0.389	0.389	0.389	0.389	0.796
lusc_k_fold	protein expression RPPA	RPPA_	DL		weighted	0.389	0.426	0.389	0.357	0.765
lusc_k_fold	protein expression RPPA	RPPA_	DL	CNN	macro	0.549	0.582	0.549	0.53	0.862
lusc_k_fold	protein expression RPPA	RPPA_	DL		micro	0.597	0.597	0.597	0.597	0.866
lusc_k_fold	protein expression RPPA	RPPA_	DL		weighted	0.597	0.62	0.597	0.573	0.851
lusc_k_fold	protein expression RPPA	RPPA_	DL	RESNET34	macro	0.401	0.39	0.401	0.381	0.802
lusc_k_fold	protein expression RPPA	RPPA_	DL		micro	0.422	0.422	0.422	0.422	0.807
lusc_k_fold	protein expression RPPA	RPPA_	DL		weighted	0.422	0.408	0.422	0.4	0.785
lusc_k_fold	protein expression RPPA	RPPA_	DL	CNN_LSTM	macro	0.549	0.588	0.549	0.537	0.864
lusc_k_fold	protein expression RPPA	RPPA_	DL		micro	0.597	0.597	0.597	0.597	0.866
lusc_k_fold	protein expression RPPA	RPPA_	DL		weighted	0.597	0.627	0.597	0.582	0.859
lusc_k_fold	protein expression RPPA	RPPA_	DL	RESNET101	macro	0.352	0.301	0.352	0.308	0.79
lusc_k_fold	protein expression RPPA	RPPA_	DL		micro	0.39	0.39	0.39	0.39	0.797
lusc_k_fold	protein expression RPPA	RPPA_	DL		weighted	0.39	0.354	0.39	0.349	0.771
lusc_k_fold	protein expression RPPA	RPPA_	DL	DENSENET161	macro	0.221	0.182	0.221	0.176	0.746
lusc_k_fold	protein expression RPPA	RPPA_	DL		micro	0.264	0.264	0.264	0.264	0.755
lusc_k_fold	protein expression RPPA	RPPA_	DL		weighted	0.264	0.224	0.264	0.213	0.718
lusc_k_fold	protein expression RPPA	RPPA_	DL	LSTM	macro	0.427	0.395	0.427	0.383	0.815
lusc_k_fold	protein expression RPPA	RPPA_	DL		micro	0.482	0.482	0.482	0.482	0.827
lusc_k_fold	protein expression RPPA	RPPA_	DL		weighted	0.482	0.43	0.482	0.428	0.779
lusc_k_fold	protein expression RPPA	RPPA_	DL	RESNET50	macro	0.384	0.386	0.384	0.362	0.801
lusc_k_fold	protein expression RPPA	RPPA_	DL		micro	0.421	0.421	0.421	0.421	0.807
lusc_k_fold	protein expression RPPA	RPPA_	DL		weighted	0.421	0.397	0.421	0.388	0.781
lusc_k_fold	protein expression RPPA	RPPA_	DL	RNN	macro	0.571	0.605	0.571	0.561	0.873
lusc_k_fold	protein expression RPPA	RPPA_	DL		micro	0.628	0.628	0.628	0.628	0.876
lusc_k_fold	protein expression RPPA	RPPA_	DL		weighted	0.628	0.638	0.628	0.61	0.865
lusc_k_fold	protein expression RPPA	RPPA_	DL	CNN_GRU	macro	0.501	0.519	0.501	0.477	0.842
lusc_k_fold	protein expression RPPA	RPPA_	DL		micro	0.55	0.55	0.55	0.55	0.85
lusc_k_fold	protein expression RPPA	RPPA_	DL		weighted	0.55	0.551	0.55	0.517	0.819
lusc_k_fold	protein expression RPPA	RPPA_	DL	RESNET18	macro	0.415	0.416	0.415	0.382	0.808
lusc_k_fold	protein expression RPPA	RPPA_	DL		micro	0.433	0.433	0.433	0.433	0.811
lusc_k_fold	protein expression RPPA	RPPA_	DL		weighted	0.433	0.453	0.433	0.407	0.799
lusc_k_fold	protein expression RPPA	RPPA_	DL	NN	macro	0.497	0.52	0.497	0.46	0.841
lusc_k_fold	protein expression RPPA	RPPA_	DL		micro	0.551	0.551	0.551	0.551	0.85
lusc_k_fold	protein expression RPPA	RPPA_	DL		weighted	0.551	0.55	0.551	0.501	0.813
lusc_k_fold	protein expression RPPA	RPPA_	DL	DENSENET201	macro	0.3	0.229	0.3	0.229	0.772
lusc_k_fold	protein expression RPPA	RPPA_	DL		micro	0.363	0.363	0.363	0.363	0.788
lusc_k_fold	protein expression RPPA	RPPA_	DL		weighted	0.363	0.268	0.363	0.276	0.725
lusc_k_fold	protein expression RPPA	RPPA_	DL	GRU	macro	0.543	0.517	0.543	0.51	0.86
lusc_k_fold	protein expression RPPA	RPPA_	DL		micro	0.595	0.595	0.595	0.595	0.865
lusc_k_fold	protein expression RPPA	RPPA_	DL		weighted	0.595	0.572	0.595	0.56	0.846
lusc_k_fold	protein expression RPPA	RPPA_	DL	DENSENET264	macro	0.263	0.179	0.263	0.178	0.758
lusc_k_fold	protein expression RPPA	RPPA_	DL		micro	0.274	0.274	0.274	0.274	0.758
lusc_k_fold	protein expression RPPA	RPPA_	DL		weighted	0.274	0.204	0.274	0.197	0.759
lusc_k_fold	protein expression RPPA	RPPA_	DL	RESNET152	macro	0.369	0.352	0.369	0.308	0.787
lusc_k_fold	protein expression RPPA	RPPA_	DL		micro	0.343	0.343	0.343	0.343	0.781
lusc_k_fold	protein expression RPPA	RPPA_	DL		weighted	0.343	0.365	0.343	0.303	0.806
lusc_k_fold	protein expression RPPA	RPPA_	DL	DENSENET169	macro	0.268	0.229	0.268	0.197	0.753
lusc_k_fold	protein expression RPPA	RPPA_	DL		micro	0.283	0.283	0.283	0.283	0.761
lusc_k_fold	protein expression RPPA	RPPA_	DL		weighted	0.283	0.255	0.283	0.215	0.727
lusc_k_fold	protein expression RPPA	RPPA_	DL	CNN_RNN	macro	0.543	0.561	0.543	0.515	0.857
lusc_k_fold	protein expression RPPA	RPPA_	DL		micro	0.575	0.575	0.575	0.575	0.858
lusc_k_fold	protein expression RPPA	RPPA_	DL		weighted	0.575	0.602	0.575	0.553	0.855
lusc_k_fold	protein expression RPPA	RPPA_	DL	DENSENET121	macro	0.259	0.202	0.259	0.199	0.751
lusc_k_fold	protein expression RPPA	RPPA_	DL		micro	0.285	0.285	0.285	0.285	0.762
lusc_k_fold	protein expression RPPA	RPPA_	DL		weighted	0.285	0.212	0.285	0.217	0.72
lusc_k_fold	protein expression RPPA	RPPA_	ML	LIGHTGBM	macro	0.25	0.08	0.25	0.13	0.75
lusc_k_fold	protein expression RPPA	RPPA_	ML		micro	0.34	0.34	0.34	0.34	0.78
lusc_k_fold	protein expression RPPA	RPPA_	ML		weighted	0.34	0.11	0.34	0.17	0.66
lusc_k_fold	protein expression RPPA	RPPA_	ML	GAUSSIAN_NB	macro	0.53	0.59	0.53	0.52	0.85
lusc_k_fold	protein expression RPPA	RPPA_	ML		micro	0.56	0.56	0.56	0.56	0.85
lusc_k_fold	protein expression RPPA	RPPA_	ML		weighted	0.56	0.6	0.56	0.54	0.83
lusc_k_fold	protein expression RPPA	RPPA_	ML	K_NEIGHBORS	macro	0.49	0.44	0.49	0.44	0.84
lusc_k_fold	protein expression RPPA	RPPA_	ML		micro	0.54	0.54	0.54	0.54	0.85
lusc_k_fold	protein expression RPPA	RPPA_	ML		weighted	0.54	0.49	0.54	0.49	0.82
lusc_k_fold	protein expression RPPA	RPPA_	ML	HISTGBOOST	macro	0.59	0.59	0.59	0.58	0.87
lusc_k_fold	protein expression RPPA	RPPA_	ML		micro	0.63	0.63	0.63	0.63	0.88
lusc_k_fold	protein expression RPPA	RPPA_	ML		weighted	0.63	0.62	0.63	0.61	0.87
lusc_k_fold	protein expression RPPA	RPPA_	ML	CATBOOST	macro	0.49	0.53	0.49	0.46	0.84
lusc_k_fold	protein expression RPPA	RPPA_	ML		micro	0.56	0.56	0.56	0.56	0.85
lusc_k_fold	protein expression RPPA	RPPA_	ML		weighted	0.56	0.56	0.56	0.51	0.79
lusc_k_fold	protein expression RPPA	RPPA_	ML	SVM_LINEAR	macro	0.58	0.63	0.58	0.58	0.87
lusc_k_fold	protein expression RPPA	RPPA_	ML		micro	0.62	0.62	0.62	0.62	0.87
lusc_k_fold	protein expression RPPA	RPPA_	ML		weighted	0.62	0.66	0.62	0.61	0.87
lusc_k_fold	protein expression RPPA	RPPA_	ML	BERNOULLI_NB	macro	0.56	0.6	0.56	0.55	0.86
lusc_k_fold	protein expression RPPA	RPPA_	ML		micro	0.57	0.57	0.57	0.57	0.86
lusc_k_fold	protein expression RPPA	RPPA_	ML		weighted	0.57	0.61	0.57	0.56	0.85
lusc_k_fold	protein expression RPPA	RPPA_	ML	LOGISTIC_REGRESSION	macro	0.65	0.67	0.65	0.64	0.89
lusc_k_fold	protein expression RPPA	RPPA_	ML		micro	0.67	0.67	0.67	0.67	0.89
lusc_k_fold	protein expression RPPA	RPPA_	ML		weighted	0.67	0.7	0.67	0.67	0.88
lusc_k_fold	protein expression RPPA	RPPA_	ML	ADA_BOOST	macro	0.36	0.38	0.36	0.33	0.79
lusc_k_fold	protein expression RPPA	RPPA_	ML		micro	0.42	0.42	0.42	0.42	0.81
lusc_k_fold	protein expression RPPA	RPPA_	ML		weighted	0.42	0.41	0.42	0.37	0.74
lusc_k_fold	protein expression RPPA	RPPA_	ML	GBOOST	macro	0.35	0.44	0.35	0.31	0.79
lusc_k_fold	protein expression RPPA	RPPA_	ML		micro	0.43	0.43	0.43	0.43	0.81
lusc_k_fold	protein expression RPPA	RPPA_	ML		weighted	0.43	0.47	0.43	0.35	0.72
lusc_k_fold	protein expression RPPA	RPPA_	ML	XGBOOST	macro	0.55	0.51	0.55	0.52	0.86
lusc_k_fold	protein expression RPPA	RPPA_	ML		micro	0.58	0.58	0.58	0.58	0.86
lusc_k_fold	protein expression RPPA	RPPA_	ML		weighted	0.58	0.55	0.58	0.56	0.84
lusc_k_fold	protein expression RPPA	RPPA_	ML	QUADRATIC_DISCRIMINANT	macro	0.31	0.37	0.31	0.3	0.78
lusc_k_fold	protein expression RPPA	RPPA_	ML		micro	0.32	0.32	0.32	0.32	0.77
lusc_k_fold	protein expression RPPA	RPPA_	ML		weighted	0.32	0.42	0.32	0.31	0.8
lusc_k_fold	protein expression RPPA	RPPA_	ML	MLP	macro	0.58	0.62	0.58	0.57	0.87
lusc_k_fold	protein expression RPPA	RPPA_	ML		micro	0.63	0.63	0.63	0.63	0.88
lusc_k_fold	protein expression RPPA	RPPA_	ML		weighted	0.63	0.64	0.63	0.61	0.86
lusc_k_fold	protein expression RPPA	RPPA_	ML	RANDOM_FOREST	macro	0.52	0.49	0.52	0.49	0.86
lusc_k_fold	protein expression RPPA	RPPA_	ML		micro	0.6	0.6	0.6	0.6	0.87
lusc_k_fold	protein expression RPPA	RPPA_	ML		weighted	0.6	0.54	0.6	0.54	0.83
lusc_k_fold	protein expression RPPA	RPPA_	ML	DECISION_TREE	macro	0.4	0.44	0.4	0.4	0.8
lusc_k_fold	protein expression RPPA	RPPA_	ML		micro	0.43	0.43	0.43	0.43	0.81
lusc_k_fold	protein expression RPPA	RPPA_	ML		weighted	0.43	0.46	0.43	0.42	0.78
ucec_k_fold	copy number (gene-level)	Gistic2_all_data_by_genes	DL	DEEPGENE	macro	0.409	0.413	0.409	0.4	0.882
ucec_k_fold	copy number (gene-level)	Gistic2_all_data_by_genes	DL		micro	0.543	0.543	0.543	0.543	0.886
ucec_k_fold	copy number (gene-level)	Gistic2_all_data_by_genes	DL		weighted	0.543	0.527	0.543	0.523	0.866
ucec_k_fold	copy number (gene-level)	Gistic2_all_data_by_genes	DL	CNN	macro	0.44	0.42	0.44	0.42	0.89
ucec_k_fold	copy number (gene-level)	Gistic2_all_data_by_genes	DL		micro	0.59	0.59	0.59	0.59	0.9
ucec_k_fold	copy number (gene-level)	Gistic2_all_data_by_genes	DL		weighted	0.59	0.55	0.59	0.55	0.86
ucec_k_fold	copy number (gene-level)	Gistic2_all_data_by_genes	DL	RESNET34	macro	0.43	0.41	0.43	0.39	0.89
ucec_k_fold	copy number (gene-level)	Gistic2_all_data_by_genes	DL		micro	0.57	0.57	0.57	0.57	0.89
ucec_k_fold	copy number (gene-level)	Gistic2_all_data_by_genes	DL		weighted	0.57	0.53	0.57	0.52	0.86
ucec_k_fold	copy number (gene-level)	Gistic2_all_data_by_genes	DL	CNN_LSTM	macro	0.43	0.39	0.43	0.4	0.89
ucec_k_fold	copy number (gene-level)	Gistic2_all_data_by_genes	DL		micro	0.58	0.58	0.58	0.58	0.89
ucec_k_fold	copy number (gene-level)	Gistic2_all_data_by_genes	DL		weighted	0.58	0.51	0.58	0.53	0.86
ucec_k_fold	copy number (gene-level)	Gistic2_all_data_by_genes	DL	RESNET101	macro	0.44	0.41	0.44	0.39	0.89
ucec_k_fold	copy number (gene-level)	Gistic2_all_data_by_genes	DL		micro	0.56	0.56	0.56	0.56	0.89
ucec_k_fold	copy number (gene-level)	Gistic2_all_data_by_genes	DL		weighted	0.56	0.54	0.56	0.52	0.87
ucec_k_fold	copy number (gene-level)	Gistic2_all_data_by_genes	DL	DENSENET161	macro	0.29	0.2	0.29	0.21	0.83
ucec_k_fold	copy number (gene-level)	Gistic2_all_data_by_genes	DL		micro	0.4	0.4	0.4	0.4	0.85
ucec_k_fold	copy number (gene-level)	Gistic2_all_data_by_genes	DL		weighted	0.4	0.28	0.4	0.29	0.77
ucec_k_fold	copy number (gene-level)	Gistic2_all_data_by_genes	DL	LSTM	macro	0.43	0.42	0.43	0.42	0.88
ucec_k_fold	copy number (gene-level)	Gistic2_all_data_by_genes	DL		micro	0.56	0.56	0.56	0.56	0.89
ucec_k_fold	copy number (gene-level)	Gistic2_all_data_by_genes	DL		weighted	0.56	0.53	0.56	0.54	0.86
ucec_k_fold	copy number (gene-level)	Gistic2_all_data_by_genes	DL	RESNET50	macro	0.41	0.43	0.41	0.36	0.88
ucec_k_fold	copy number (gene-level)	Gistic2_all_data_by_genes	DL		micro	0.56	0.56	0.56	0.56	0.89
ucec_k_fold	copy number (gene-level)	Gistic2_all_data_by_genes	DL		weighted	0.56	0.55	0.56	0.5	0.85
ucec_k_fold	copy number (gene-level)	Gistic2_all_data_by_genes	DL	RNN	macro	0.44	0.42	0.44	0.43	0.89
ucec_k_fold	copy number (gene-level)	Gistic2_all_data_by_genes	DL		micro	0.58	0.58	0.58	0.58	0.9
ucec_k_fold	copy number (gene-level)	Gistic2_all_data_by_genes	DL		weighted	0.58	0.55	0.58	0.56	0.87
ucec_k_fold	copy number (gene-level)	Gistic2_all_data_by_genes	DL	CNN_GRU	macro	0.43	0.42	0.43	0.39	0.89
ucec_k_fold	copy number (gene-level)	Gistic2_all_data_by_genes	DL		micro	0.59	0.59	0.59	0.59	0.9
ucec_k_fold	copy number (gene-level)	Gistic2_all_data_by_genes	DL		weighted	0.59	0.54	0.59	0.54	0.86
ucec_k_fold	copy number (gene-level)	Gistic2_all_data_by_genes	DL	RESNET18	macro	0.39	0.36	0.39	0.34	0.87
ucec_k_fold	copy number (gene-level)	Gistic2_all_data_by_genes	DL		micro	0.52	0.52	0.52	0.52	0.88
ucec_k_fold	copy number (gene-level)	Gistic2_all_data_by_genes	DL		weighted	0.52	0.48	0.52	0.46	0.85
ucec_k_fold	copy number (gene-level)	Gistic2_all_data_by_genes	DL	NN	macro	0.44	0.44	0.44	0.42	0.89
ucec_k_fold	copy number (gene-level)	Gistic2_all_data_by_genes	DL		micro	0.57	0.57	0.57	0.57	0.89
ucec_k_fold	copy number (gene-level)	Gistic2_all_data_by_genes	DL		weighted	0.57	0.54	0.57	0.54	0.87
ucec_k_fold	copy number (gene-level)	Gistic2_all_data_by_genes	DL	DENSENET201	macro	0.28	0.22	0.28	0.22	0.83
ucec_k_fold	copy number (gene-level)	Gistic2_all_data_by_genes	DL		micro	0.4	0.4	0.4	0.4	0.85
ucec_k_fold	copy number (gene-level)	Gistic2_all_data_by_genes	DL		weighted	0.4	0.31	0.4	0.31	0.77
ucec_k_fold	copy number (gene-level)	Gistic2_all_data_by_genes	DL	GRU	macro	0.43	0.41	0.43	0.42	0.88
ucec_k_fold	copy number (gene-level)	Gistic2_all_data_by_genes	DL		micro	0.55	0.55	0.55	0.55	0.89
ucec_k_fold	copy number (gene-level)	Gistic2_all_data_by_genes	DL		weighted	0.55	0.53	0.55	0.54	0.86
ucec_k_fold	copy number (gene-level)	Gistic2_all_data_by_genes	DL	DENSENET264	macro	0.33	0.24	0.33	0.25	0.85
ucec_k_fold	copy number (gene-level)	Gistic2_all_data_by_genes	DL		micro	0.42	0.42	0.42	0.42	0.86
ucec_k_fold	copy number (gene-level)	Gistic2_all_data_by_genes	DL		weighted	0.42	0.34	0.42	0.34	0.83
ucec_k_fold	copy number (gene-level)	Gistic2_all_data_by_genes	DL	RESNET152	macro	0.37	0.26	0.37	0.29	0.87
ucec_k_fold	copy number (gene-level)	Gistic2_all_data_by_genes	DL		micro	0.51	0.51	0.51	0.51	0.88
ucec_k_fold	copy number (gene-level)	Gistic2_all_data_by_genes	DL		weighted	0.51	0.38	0.51	0.41	0.82
ucec_k_fold	copy number (gene-level)	Gistic2_all_data_by_genes	DL	DENSENET169	macro	0.36	0.3	0.36	0.3	0.86
ucec_k_fold	copy number (gene-level)	Gistic2_all_data_by_genes	DL		micro	0.48	0.48	0.48	0.48	0.87
ucec_k_fold	copy number (gene-level)	Gistic2_all_data_by_genes	DL		weighted	0.48	0.42	0.48	0.42	0.83
ucec_k_fold	copy number (gene-level)	Gistic2_all_data_by_genes	DL	CNN_RNN	macro	0.41	0.4	0.41	0.38	0.88
ucec_k_fold	copy number (gene-level)	Gistic2_all_data_by_genes	DL		micro	0.55	0.55	0.55	0.55	0.89
ucec_k_fold	copy number (gene-level)	Gistic2_all_data_by_genes	DL		weighted	0.55	0.51	0.55	0.5	0.84
ucec_k_fold	copy number (gene-level)	Gistic2_all_data_by_genes	DL	DENSENET121	macro	0.31	0.24	0.31	0.25	0.85
ucec_k_fold	copy number (gene-level)	Gistic2_all_data_by_genes	DL		micro	0.43	0.43	0.43	0.43	0.86
ucec_k_fold	copy number (gene-level)	Gistic2_all_data_by_genes	DL		weighted	0.43	0.34	0.43	0.35	0.8
ucec_k_fold	copy number (gene-level)	Gistic2_all_data_by_genes	ML	LIGHTGBM	macro	0.36	0.29	0.36	0.29	0.86
ucec_k_fold	copy number (gene-level)	Gistic2_all_data_by_genes	ML		micro	0.51	0.51	0.51	0.51	0.88
ucec_k_fold	copy number (gene-level)	Gistic2_all_data_by_genes	ML		weighted	0.51	0.39	0.51	0.41	0.81
ucec_k_fold	copy number (gene-level)	Gistic2_all_data_by_genes	ML	GAUSSIAN_NB	macro	0.4	0.39	0.4	0.35	0.87
ucec_k_fold	copy number (gene-level)	Gistic2_all_data_by_genes	ML		micro	0.48	0.48	0.48	0.48	0.87
ucec_k_fold	copy number (gene-level)	Gistic2_all_data_by_genes	ML		weighted	0.48	0.51	0.48	0.45	0.88
ucec_k_fold	copy number (gene-level)	Gistic2_all_data_by_genes	ML	K_NEIGHBORS	macro	0.27	0.31	0.27	0.22	0.83
ucec_k_fold	copy number (gene-level)	Gistic2_all_data_by_genes	ML		micro	0.34	0.34	0.34	0.34	0.84
ucec_k_fold	copy number (gene-level)	Gistic2_all_data_by_genes	ML		weighted	0.34	0.42	0.34	0.28	0.78
ucec_k_fold	copy number (gene-level)	Gistic2_all_data_by_genes	ML	HISTGBOOST	macro	0.42	0.4	0.42	0.41	0.89
ucec_k_fold	copy number (gene-level)	Gistic2_all_data_by_genes	ML		micro	0.56	0.56	0.56	0.56	0.89
ucec_k_fold	copy number (gene-level)	Gistic2_all_data_by_genes	ML		weighted	0.56	0.52	0.56	0.54	0.86
ucec_k_fold	copy number (gene-level)	Gistic2_all_data_by_genes	ML	CATBOOST	macro	0.44	0.36	0.44	0.38	0.89
ucec_k_fold	copy number (gene-level)	Gistic2_all_data_by_genes	ML		micro	0.6	0.6	0.6	0.6	0.9
ucec_k_fold	copy number (gene-level)	Gistic2_all_data_by_genes	ML		weighted	0.6	0.49	0.6	0.53	0.86
ucec_k_fold	copy number (gene-level)	Gistic2_all_data_by_genes	ML	SVM_LINEAR	macro	0.45	0.46	0.45	0.45	0.89
ucec_k_fold	copy number (gene-level)	Gistic2_all_data_by_genes	ML		micro	0.57	0.57	0.57	0.57	0.89
ucec_k_fold	copy number (gene-level)	Gistic2_all_data_by_genes	ML		weighted	0.57	0.57	0.57	0.56	0.88
ucec_k_fold	copy number (gene-level)	Gistic2_all_data_by_genes	ML	BERNOULLI_NB	macro	0.4	0.41	0.4	0.39	0.87
ucec_k_fold	copy number (gene-level)	Gistic2_all_data_by_genes	ML		micro	0.48	0.48	0.48	0.48	0.87
ucec_k_fold	copy number (gene-level)	Gistic2_all_data_by_genes	ML		weighted	0.48	0.52	0.48	0.49	0.87
ucec_k_fold	copy number (gene-level)	Gistic2_all_data_by_genes	ML	LOGISTIC_REGRESSION	macro	0.37	0.41	0.37	0.37	0.86
ucec_k_fold	copy number (gene-level)	Gistic2_all_data_by_genes	ML		micro	0.46	0.46	0.46	0.46	0.87
ucec_k_fold	copy number (gene-level)	Gistic2_all_data_by_genes	ML		weighted	0.46	0.52	0.46	0.47	0.85
ucec_k_fold	copy number (gene-level)	Gistic2_all_data_by_genes	ML	ADA_BOOST	macro	0.36	0.26	0.36	0.29	0.87
ucec_k_fold	copy number (gene-level)	Gistic2_all_data_by_genes	ML		micro	0.52	0.52	0.52	0.52	0.88
ucec_k_fold	copy number (gene-level)	Gistic2_all_data_by_genes	ML		weighted	0.52	0.38	0.52	0.41	0.82
ucec_k_fold	copy number (gene-level)	Gistic2_all_data_by_genes	ML	GBOOST	macro	0.33	0.25	0.33	0.25	0.85
ucec_k_fold	copy number (gene-level)	Gistic2_all_data_by_genes	ML		micro	0.48	0.48	0.48	0.48	0.87
ucec_k_fold	copy number (gene-level)	Gistic2_all_data_by_genes	ML		weighted	0.48	0.34	0.48	0.36	0.79
ucec_k_fold	copy number (gene-level)	Gistic2_all_data_by_genes	ML	XGBOOST	macro	0.43	0.41	0.43	0.42	0.89
ucec_k_fold	copy number (gene-level)	Gistic2_all_data_by_genes	ML		micro	0.57	0.57	0.57	0.57	0.89
ucec_k_fold	copy number (gene-level)	Gistic2_all_data_by_genes	ML		weighted	0.57	0.53	0.57	0.54	0.87
ucec_k_fold	copy number (gene-level)	Gistic2_all_data_by_genes	ML	QUADRATIC_DISCRIMINANT	macro	0.21	0.21	0.21	0.16	0.8
ucec_k_fold	copy number (gene-level)	Gistic2_all_data_by_genes	ML		micro	0.25	0.25	0.25	0.25	0.81
ucec_k_fold	copy number (gene-level)	Gistic2_all_data_by_genes	ML		weighted	0.25	0.25	0.25	0.19	0.78
ucec_k_fold	copy number (gene-level)	Gistic2_all_data_by_genes	ML	MLP	macro	0.37	0.36	0.37	0.36	0.87
ucec_k_fold	copy number (gene-level)	Gistic2_all_data_by_genes	ML		micro	0.5	0.5	0.5	0.5	0.87
ucec_k_fold	copy number (gene-level)	Gistic2_all_data_by_genes	ML		weighted	0.5	0.48	0.5	0.48	0.85
ucec_k_fold	copy number (gene-level)	Gistic2_all_data_by_genes	ML	RANDOM_FOREST	macro	0.44	0.43	0.44	0.43	0.89
ucec_k_fold	copy number (gene-level)	Gistic2_all_data_by_genes	ML		micro	0.59	0.59	0.59	0.59	0.9
ucec_k_fold	copy number (gene-level)	Gistic2_all_data_by_genes	ML		weighted	0.59	0.55	0.59	0.56	0.86
ucec_k_fold	copy number (gene-level)	Gistic2_all_data_by_genes	ML	DECISION_TREE	macro	0.39	0.4	0.39	0.39	0.87
ucec_k_fold	copy number (gene-level)	Gistic2_all_data_by_genes	ML		micro	0.49	0.49	0.49	0.49	0.87
ucec_k_fold	copy number (gene-level)	Gistic2_all_data_by_genes	ML		weighted	0.49	0.5	0.49	0.49	0.85
ucec_k_fold	copy number (gene-level)	Gistic2_all_thresholded	DL	DEEPGENE	macro	0.38	0.368	0.38	0.369	0.87
ucec_k_fold	copy number (gene-level)	Gistic2_all_thresholded	DL		micro	0.502	0.502	0.502	0.502	0.876
ucec_k_fold	copy number (gene-level)	Gistic2_all_thresholded	DL		weighted	0.502	0.475	0.502	0.483	0.847
ucec_k_fold	copy number (gene-level)	Gistic2_all_thresholded	DL	CNN	macro	0.41	0.41	0.41	0.39	0.88
ucec_k_fold	copy number (gene-level)	Gistic2_all_thresholded	DL		micro	0.55	0.55	0.55	0.55	0.89
ucec_k_fold	copy number (gene-level)	Gistic2_all_thresholded	DL		weighted	0.55	0.52	0.55	0.52	0.85
ucec_k_fold	copy number (gene-level)	Gistic2_all_thresholded	DL	RESNET34	macro	0.37	0.31	0.37	0.3	0.86
ucec_k_fold	copy number (gene-level)	Gistic2_all_thresholded	DL		micro	0.51	0.51	0.51	0.51	0.88
ucec_k_fold	copy number (gene-level)	Gistic2_all_thresholded	DL		weighted	0.51	0.41	0.51	0.41	0.81
ucec_k_fold	copy number (gene-level)	Gistic2_all_thresholded	DL	CNN_LSTM	macro	0.42	0.35	0.42	0.38	0.89
ucec_k_fold	copy number (gene-level)	Gistic2_all_thresholded	DL		micro	0.57	0.57	0.57	0.57	0.89
ucec_k_fold	copy number (gene-level)	Gistic2_all_thresholded	DL		weighted	0.57	0.49	0.57	0.52	0.85
ucec_k_fold	copy number (gene-level)	Gistic2_all_thresholded	DL	RESNET101	macro	0.31	0.19	0.31	0.22	0.84
ucec_k_fold	copy number (gene-level)	Gistic2_all_thresholded	DL		micro	0.41	0.41	0.41	0.41	0.85
ucec_k_fold	copy number (gene-level)	Gistic2_all_thresholded	DL		weighted	0.41	0.27	0.41	0.3	0.8
ucec_k_fold	copy number (gene-level)	Gistic2_all_thresholded	DL	DENSENET161	macro	0.2	0.06	0.2	0.09	0.8
ucec_k_fold	copy number (gene-level)	Gistic2_all_thresholded	DL		micro	0.3	0.3	0.3	0.3	0.83
ucec_k_fold	copy number (gene-level)	Gistic2_all_thresholded	DL		weighted	0.3	0.09	0.3	0.14	0.7
ucec_k_fold	copy number (gene-level)	Gistic2_all_thresholded	DL	LSTM	macro	0.39	0.35	0.39	0.36	0.87
ucec_k_fold	copy number (gene-level)	Gistic2_all_thresholded	DL		micro	0.53	0.53	0.53	0.53	0.88
ucec_k_fold	copy number (gene-level)	Gistic2_all_thresholded	DL		weighted	0.53	0.46	0.53	0.48	0.84
ucec_k_fold	copy number (gene-level)	Gistic2_all_thresholded	DL	RESNET50	macro	0.33	0.27	0.33	0.26	0.86
ucec_k_fold	copy number (gene-level)	Gistic2_all_thresholded	DL		micro	0.45	0.45	0.45	0.45	0.86
ucec_k_fold	copy number (gene-level)	Gistic2_all_thresholded	DL		weighted	0.45	0.35	0.45	0.36	0.83
ucec_k_fold	copy number (gene-level)	Gistic2_all_thresholded	DL	RNN	macro	0.4	0.39	0.4	0.38	0.87
ucec_k_fold	copy number (gene-level)	Gistic2_all_thresholded	DL		micro	0.53	0.53	0.53	0.53	0.88
ucec_k_fold	copy number (gene-level)	Gistic2_all_thresholded	DL		weighted	0.53	0.48	0.53	0.49	0.84
ucec_k_fold	copy number (gene-level)	Gistic2_all_thresholded	DL	CNN_GRU	macro	0.41	0.39	0.41	0.37	0.88
ucec_k_fold	copy number (gene-level)	Gistic2_all_thresholded	DL		micro	0.57	0.57	0.57	0.57	0.89
ucec_k_fold	copy number (gene-level)	Gistic2_all_thresholded	DL		weighted	0.57	0.51	0.57	0.5	0.85
ucec_k_fold	copy number (gene-level)	Gistic2_all_thresholded	DL	RESNET18	macro	0.42	0.37	0.42	0.38	0.89
ucec_k_fold	copy number (gene-level)	Gistic2_all_thresholded	DL		micro	0.58	0.58	0.58	0.58	0.9
ucec_k_fold	copy number (gene-level)	Gistic2_all_thresholded	DL		weighted	0.58	0.5	0.58	0.52	0.86
ucec_k_fold	copy number (gene-level)	Gistic2_all_thresholded	DL	NN	macro	0.39	0.36	0.39	0.36	0.88
ucec_k_fold	copy number (gene-level)	Gistic2_all_thresholded	DL		micro	0.53	0.53	0.53	0.53	0.88
ucec_k_fold	copy number (gene-level)	Gistic2_all_thresholded	DL		weighted	0.53	0.48	0.53	0.49	0.85
ucec_k_fold	copy number (gene-level)	Gistic2_all_thresholded	DL	DENSENET201	macro	0.26	0.15	0.26	0.16	0.82
ucec_k_fold	copy number (gene-level)	Gistic2_all_thresholded	DL		micro	0.38	0.38	0.38	0.38	0.84
ucec_k_fold	copy number (gene-level)	Gistic2_all_thresholded	DL		weighted	0.38	0.21	0.38	0.24	0.75
ucec_k_fold	copy number (gene-level)	Gistic2_all_thresholded	DL	GRU	macro	0.4	0.37	0.4	0.37	0.88
ucec_k_fold	copy number (gene-level)	Gistic2_all_thresholded	DL		micro	0.54	0.54	0.54	0.54	0.88
ucec_k_fold	copy number (gene-level)	Gistic2_all_thresholded	DL		weighted	0.54	0.48	0.54	0.5	0.85
ucec_k_fold	copy number (gene-level)	Gistic2_all_thresholded	DL	DENSENET264	macro	0.23	0.09	0.23	0.13	0.81
ucec_k_fold	copy number (gene-level)	Gistic2_all_thresholded	DL		micro	0.34	0.34	0.34	0.34	0.84
ucec_k_fold	copy number (gene-level)	Gistic2_all_thresholded	DL		weighted	0.34	0.14	0.34	0.19	0.72
ucec_k_fold	copy number (gene-level)	Gistic2_all_thresholded	DL	RESNET152	macro	0.26	0.15	0.26	0.17	0.82
ucec_k_fold	copy number (gene-level)	Gistic2_all_thresholded	DL		micro	0.35	0.35	0.35	0.35	0.84
ucec_k_fold	copy number (gene-level)	Gistic2_all_thresholded	DL		weighted	0.35	0.21	0.35	0.24	0.76
ucec_k_fold	copy number (gene-level)	Gistic2_all_thresholded	DL	DENSENET169	macro	0.24	0.1	0.24	0.13	0.81
ucec_k_fold	copy number (gene-level)	Gistic2_all_thresholded	DL		micro	0.35	0.35	0.35	0.35	0.84
ucec_k_fold	copy number (gene-level)	Gistic2_all_thresholded	DL		weighted	0.35	0.15	0.35	0.2	0.72
ucec_k_fold	copy number (gene-level)	Gistic2_all_thresholded	DL	CNN_RNN	macro	0.44	0.45	0.44	0.42	0.89
ucec_k_fold	copy number (gene-level)	Gistic2_all_thresholded	DL		micro	0.58	0.58	0.58	0.58	0.9
ucec_k_fold	copy number (gene-level)	Gistic2_all_thresholded	DL		weighted	0.58	0.56	0.58	0.55	0.86
ucec_k_fold	copy number (gene-level)	Gistic2_all_thresholded	DL	DENSENET121	macro	0.22	0.08	0.22	0.12	0.81
ucec_k_fold	copy number (gene-level)	Gistic2_all_thresholded	DL		micro	0.33	0.33	0.33	0.33	0.83
ucec_k_fold	copy number (gene-level)	Gistic2_all_thresholded	DL		weighted	0.33	0.13	0.33	0.18	0.71
ucec_k_fold	copy number (gene-level)	Gistic2_all_thresholded	ML	LIGHTGBM	macro	0.34	0.2	0.34	0.25	0.86
ucec_k_fold	copy number (gene-level)	Gistic2_all_thresholded	ML		micro	0.5	0.5	0.5	0.5	0.87
ucec_k_fold	copy number (gene-level)	Gistic2_all_thresholded	ML		weighted	0.5	0.29	0.5	0.37	0.8
ucec_k_fold	copy number (gene-level)	Gistic2_all_thresholded	ML	GAUSSIAN_NB	macro	0.4	0.38	0.4	0.34	0.87
ucec_k_fold	copy number (gene-level)	Gistic2_all_thresholded	ML		micro	0.47	0.47	0.47	0.47	0.87
ucec_k_fold	copy number (gene-level)	Gistic2_all_thresholded	ML		weighted	0.47	0.49	0.47	0.43	0.88
ucec_k_fold	copy number (gene-level)	Gistic2_all_thresholded	ML	K_NEIGHBORS	macro	0.24	0.22	0.24	0.18	0.81
ucec_k_fold	copy number (gene-level)	Gistic2_all_thresholded	ML		micro	0.3	0.3	0.3	0.3	0.82
ucec_k_fold	copy number (gene-level)	Gistic2_all_thresholded	ML		weighted	0.3	0.29	0.3	0.22	0.77
ucec_k_fold	copy number (gene-level)	Gistic2_all_thresholded	ML	HISTGBOOST	macro	0.45	0.47	0.45	0.44	0.89
ucec_k_fold	copy number (gene-level)	Gistic2_all_thresholded	ML		micro	0.58	0.58	0.58	0.58	0.89
ucec_k_fold	copy number (gene-level)	Gistic2_all_thresholded	ML		weighted	0.58	0.56	0.58	0.55	0.87
ucec_k_fold	copy number (gene-level)	Gistic2_all_thresholded	ML	CATBOOST	macro	0.41	0.36	0.41	0.36	0.88
ucec_k_fold	copy number (gene-level)	Gistic2_all_thresholded	ML		micro	0.57	0.57	0.57	0.57	0.89
ucec_k_fold	copy number (gene-level)	Gistic2_all_thresholded	ML		weighted	0.57	0.49	0.57	0.5	0.85
ucec_k_fold	copy number (gene-level)	Gistic2_all_thresholded	ML	SVM_LINEAR	macro	0.41	0.41	0.41	0.4	0.87
ucec_k_fold	copy number (gene-level)	Gistic2_all_thresholded	ML		micro	0.51	0.51	0.51	0.51	0.88
ucec_k_fold	copy number (gene-level)	Gistic2_all_thresholded	ML		weighted	0.51	0.5	0.51	0.5	0.85
ucec_k_fold	copy number (gene-level)	Gistic2_all_thresholded	ML	BERNOULLI_NB	macro	0.44	0.45	0.44	0.41	0.87
ucec_k_fold	copy number (gene-level)	Gistic2_all_thresholded	ML		micro	0.46	0.46	0.46	0.46	0.87
ucec_k_fold	copy number (gene-level)	Gistic2_all_thresholded	ML		weighted	0.46	0.55	0.46	0.47	0.88
ucec_k_fold	copy number (gene-level)	Gistic2_all_thresholded	ML	LOGISTIC_REGRESSION	macro	0.36	0.37	0.36	0.35	0.86
ucec_k_fold	copy number (gene-level)	Gistic2_all_thresholded	ML		micro	0.45	0.45	0.45	0.45	0.86
ucec_k_fold	copy number (gene-level)	Gistic2_all_thresholded	ML		weighted	0.45	0.48	0.45	0.45	0.84
ucec_k_fold	copy number (gene-level)	Gistic2_all_thresholded	ML	ADA_BOOST	macro	0.37	0.25	0.37	0.28	0.87
ucec_k_fold	copy number (gene-level)	Gistic2_all_thresholded	ML		micro	0.52	0.52	0.52	0.52	0.88
ucec_k_fold	copy number (gene-level)	Gistic2_all_thresholded	ML		weighted	0.52	0.37	0.52	0.41	0.82
ucec_k_fold	copy number (gene-level)	Gistic2_all_thresholded	ML	GBOOST	macro	0.38	0.25	0.38	0.29	0.87
ucec_k_fold	copy number (gene-level)	Gistic2_all_thresholded	ML		micro	0.54	0.54	0.54	0.54	0.89
ucec_k_fold	copy number (gene-level)	Gistic2_all_thresholded	ML		weighted	0.54	0.36	0.54	0.42	0.83
ucec_k_fold	copy number (gene-level)	Gistic2_all_thresholded	ML	XGBOOST	macro	0.44	0.45	0.44	0.43	0.89
ucec_k_fold	copy number (gene-level)	Gistic2_all_thresholded	ML		micro	0.57	0.57	0.57	0.57	0.89
ucec_k_fold	copy number (gene-level)	Gistic2_all_thresholded	ML		weighted	0.57	0.54	0.57	0.54	0.87
ucec_k_fold	copy number (gene-level)	Gistic2_all_thresholded	ML	QUADRATIC_DISCRIMINANT	macro	0.26	0.29	0.26	0.22	0.83
ucec_k_fold	copy number (gene-level)	Gistic2_all_thresholded	ML		micro	0.32	0.32	0.32	0.32	0.83
ucec_k_fold	copy number (gene-level)	Gistic2_all_thresholded	ML		weighted	0.32	0.35	0.32	0.27	0.82
ucec_k_fold	copy number (gene-level)	Gistic2_all_thresholded	ML	MLP	macro	0.4	0.44	0.4	0.39	0.87
ucec_k_fold	copy number (gene-level)	Gistic2_all_thresholded	ML		micro	0.52	0.52	0.52	0.52	0.88
ucec_k_fold	copy number (gene-level)	Gistic2_all_thresholded	ML		weighted	0.52	0.51	0.52	0.49	0.84
ucec_k_fold	copy number (gene-level)	Gistic2_all_thresholded	ML	RANDOM_FOREST	macro	0.42	0.44	0.42	0.4	0.88
ucec_k_fold	copy number (gene-level)	Gistic2_all_thresholded	ML		micro	0.55	0.55	0.55	0.55	0.89
ucec_k_fold	copy number (gene-level)	Gistic2_all_thresholded	ML		weighted	0.55	0.51	0.55	0.51	0.85
ucec_k_fold	copy number (gene-level)	Gistic2_all_thresholded	ML	DECISION_TREE	macro	0.39	0.44	0.39	0.38	0.87
ucec_k_fold	copy number (gene-level)	Gistic2_all_thresholded	ML		micro	0.5	0.5	0.5	0.5	0.88
ucec_k_fold	copy number (gene-level)	Gistic2_all_thresholded	ML		weighted	0.5	0.52	0.5	0.49	0.84
ucec_k_fold	somatic mutation (SNP and INDEL)	_mc3_gene_level_	DL	DEEPGENE	macro	0.614	0.619	0.614	0.604	0.929
ucec_k_fold	somatic mutation (SNP and INDEL)	_mc3_gene_level_	DL		micro	0.737	0.737	0.737	0.737	0.934
ucec_k_fold	somatic mutation (SNP and INDEL)	_mc3_gene_level_	DL		weighted	0.737	0.735	0.737	0.721	0.908
ucec_k_fold	somatic mutation (SNP and INDEL)	_mc3_gene_level_	DL	CNN	macro	0.62	0.63	0.62	0.59	0.93
ucec_k_fold	somatic mutation (SNP and INDEL)	_mc3_gene_level_	DL		micro	0.74	0.74	0.74	0.74	0.94
ucec_k_fold	somatic mutation (SNP and INDEL)	_mc3_gene_level_	DL		weighted	0.74	0.77	0.74	0.72	0.92
ucec_k_fold	somatic mutation (SNP and INDEL)	_mc3_gene_level_	DL	RESNET34	macro	0.54	0.56	0.54	0.51	0.9
ucec_k_fold	somatic mutation (SNP and INDEL)	_mc3_gene_level_	DL		micro	0.64	0.64	0.64	0.64	0.91
ucec_k_fold	somatic mutation (SNP and INDEL)	_mc3_gene_level_	DL		weighted	0.64	0.65	0.64	0.58	0.86
ucec_k_fold	somatic mutation (SNP and INDEL)	_mc3_gene_level_	DL	CNN_LSTM	macro	0.6	0.58	0.6	0.57	0.93
ucec_k_fold	somatic mutation (SNP and INDEL)	_mc3_gene_level_	DL		micro	0.73	0.73	0.73	0.73	0.93
ucec_k_fold	somatic mutation (SNP and INDEL)	_mc3_gene_level_	DL		weighted	0.73	0.71	0.73	0.7	0.91
ucec_k_fold	somatic mutation (SNP and INDEL)	_mc3_gene_level_	DL	RESNET101	macro	0.52	0.47	0.52	0.48	0.89
ucec_k_fold	somatic mutation (SNP and INDEL)	_mc3_gene_level_	DL		micro	0.61	0.61	0.61	0.61	0.9
ucec_k_fold	somatic mutation (SNP and INDEL)	_mc3_gene_level_	DL		weighted	0.61	0.52	0.61	0.54	0.85
ucec_k_fold	somatic mutation (SNP and INDEL)	_mc3_gene_level_	DL	DENSENET161	macro	0.23	0.1	0.23	0.13	0.81
ucec_k_fold	somatic mutation (SNP and INDEL)	_mc3_gene_level_	DL		micro	0.3	0.3	0.3	0.3	0.83
ucec_k_fold	somatic mutation (SNP and INDEL)	_mc3_gene_level_	DL		weighted	0.3	0.13	0.3	0.17	0.75
ucec_k_fold	somatic mutation (SNP and INDEL)	_mc3_gene_level_	DL	LSTM	macro	0.57	0.61	0.57	0.57	0.92
ucec_k_fold	somatic mutation (SNP and INDEL)	_mc3_gene_level_	DL		micro	0.71	0.71	0.71	0.71	0.93
ucec_k_fold	somatic mutation (SNP and INDEL)	_mc3_gene_level_	DL		weighted	0.71	0.71	0.71	0.7	0.89
ucec_k_fold	somatic mutation (SNP and INDEL)	_mc3_gene_level_	DL	RESNET50	macro	0.52	0.51	0.52	0.47	0.9
ucec_k_fold	somatic mutation (SNP and INDEL)	_mc3_gene_level_	DL		micro	0.63	0.63	0.63	0.63	0.91
ucec_k_fold	somatic mutation (SNP and INDEL)	_mc3_gene_level_	DL		weighted	0.63	0.57	0.63	0.54	0.85
ucec_k_fold	somatic mutation (SNP and INDEL)	_mc3_gene_level_	DL	RNN	macro	0.62	0.62	0.62	0.62	0.94
ucec_k_fold	somatic mutation (SNP and INDEL)	_mc3_gene_level_	DL		micro	0.76	0.76	0.76	0.76	0.94
ucec_k_fold	somatic mutation (SNP and INDEL)	_mc3_gene_level_	DL		weighted	0.76	0.75	0.76	0.75	0.92
ucec_k_fold	somatic mutation (SNP and INDEL)	_mc3_gene_level_	DL	CNN_GRU	macro	0.69	0.68	0.69	0.68	0.96
ucec_k_fold	somatic mutation (SNP and INDEL)	_mc3_gene_level_	DL		micro	0.83	0.83	0.83	0.83	0.96
ucec_k_fold	somatic mutation (SNP and INDEL)	_mc3_gene_level_	DL		weighted	0.83	0.81	0.83	0.82	0.94
ucec_k_fold	somatic mutation (SNP and INDEL)	_mc3_gene_level_	DL	RESNET18	macro	0.54	0.57	0.54	0.51	0.9
ucec_k_fold	somatic mutation (SNP and INDEL)	_mc3_gene_level_	DL		micro	0.63	0.63	0.63	0.63	0.91
ucec_k_fold	somatic mutation (SNP and INDEL)	_mc3_gene_level_	DL		weighted	0.63	0.67	0.63	0.59	0.86
ucec_k_fold	somatic mutation (SNP and INDEL)	_mc3_gene_level_	DL	NN	macro	0.5	0.52	0.5	0.48	0.89
ucec_k_fold	somatic mutation (SNP and INDEL)	_mc3_gene_level_	DL		micro	0.61	0.61	0.61	0.61	0.9
ucec_k_fold	somatic mutation (SNP and INDEL)	_mc3_gene_level_	DL		weighted	0.61	0.6	0.61	0.57	0.84
ucec_k_fold	somatic mutation (SNP and INDEL)	_mc3_gene_level_	DL	DENSENET201	macro	0.27	0.16	0.27	0.18	0.82
ucec_k_fold	somatic mutation (SNP and INDEL)	_mc3_gene_level_	DL		micro	0.35	0.35	0.35	0.35	0.84
ucec_k_fold	somatic mutation (SNP and INDEL)	_mc3_gene_level_	DL		weighted	0.35	0.19	0.35	0.22	0.75
ucec_k_fold	somatic mutation (SNP and INDEL)	_mc3_gene_level_	DL	GRU	macro	0.61	0.63	0.61	0.61	0.93
ucec_k_fold	somatic mutation (SNP and INDEL)	_mc3_gene_level_	DL		micro	0.75	0.75	0.75	0.75	0.94
ucec_k_fold	somatic mutation (SNP and INDEL)	_mc3_gene_level_	DL		weighted	0.75	0.75	0.75	0.74	0.91
ucec_k_fold	somatic mutation (SNP and INDEL)	_mc3_gene_level_	DL	DENSENET264	macro	0.2	0.09	0.2	0.11	0.8
ucec_k_fold	somatic mutation (SNP and INDEL)	_mc3_gene_level_	DL		micro	0.26	0.26	0.26	0.26	0.81
ucec_k_fold	somatic mutation (SNP and INDEL)	_mc3_gene_level_	DL		weighted	0.26	0.1	0.26	0.13	0.73
ucec_k_fold	somatic mutation (SNP and INDEL)	_mc3_gene_level_	DL	RESNET152	macro	0.43	0.38	0.43	0.37	0.87
ucec_k_fold	somatic mutation (SNP and INDEL)	_mc3_gene_level_	DL		micro	0.53	0.53	0.53	0.53	0.88
ucec_k_fold	somatic mutation (SNP and INDEL)	_mc3_gene_level_	DL		weighted	0.53	0.41	0.53	0.43	0.82
ucec_k_fold	somatic mutation (SNP and INDEL)	_mc3_gene_level_	DL	DENSENET169	macro	0.22	0.14	0.22	0.15	0.8
ucec_k_fold	somatic mutation (SNP and INDEL)	_mc3_gene_level_	DL		micro	0.27	0.27	0.27	0.27	0.82
ucec_k_fold	somatic mutation (SNP and INDEL)	_mc3_gene_level_	DL		weighted	0.27	0.15	0.27	0.17	0.75
ucec_k_fold	somatic mutation (SNP and INDEL)	_mc3_gene_level_	DL	CNN_RNN	macro	0.65	0.64	0.65	0.63	0.94
ucec_k_fold	somatic mutation (SNP and INDEL)	_mc3_gene_level_	DL		micro	0.78	0.78	0.78	0.78	0.95
ucec_k_fold	somatic mutation (SNP and INDEL)	_mc3_gene_level_	DL		weighted	0.78	0.78	0.78	0.77	0.93
ucec_k_fold	somatic mutation (SNP and INDEL)	_mc3_gene_level_	DL	DENSENET121	macro	0.27	0.2	0.27	0.18	0.82
ucec_k_fold	somatic mutation (SNP and INDEL)	_mc3_gene_level_	DL		micro	0.36	0.36	0.36	0.36	0.84
ucec_k_fold	somatic mutation (SNP and INDEL)	_mc3_gene_level_	DL		weighted	0.36	0.24	0.36	0.22	0.74
ucec_k_fold	somatic mutation (SNP and INDEL)	_mc3_gene_level_	ML	LIGHTGBM	macro	0.29	0.32	0.29	0.24	0.84
ucec_k_fold	somatic mutation (SNP and INDEL)	_mc3_gene_level_	ML		micro	0.43	0.43	0.43	0.43	0.86
ucec_k_fold	somatic mutation (SNP and INDEL)	_mc3_gene_level_	ML		weighted	0.43	0.42	0.43	0.34	0.74
ucec_k_fold	somatic mutation (SNP and INDEL)	_mc3_gene_level_	ML	GAUSSIAN_NB	macro	0.2	0.03	0.2	0.06	0.8
ucec_k_fold	somatic mutation (SNP and INDEL)	_mc3_gene_level_	ML		micro	0.15	0.15	0.15	0.15	0.79
ucec_k_fold	somatic mutation (SNP and INDEL)	_mc3_gene_level_	ML		weighted	0.15	0.02	0.15	0.04	0.84
ucec_k_fold	somatic mutation (SNP and INDEL)	_mc3_gene_level_	ML	K_NEIGHBORS	macro	0.28	0.3	0.28	0.21	0.82
ucec_k_fold	somatic mutation (SNP and INDEL)	_mc3_gene_level_	ML		micro	0.35	0.35	0.35	0.35	0.84
ucec_k_fold	somatic mutation (SNP and INDEL)	_mc3_gene_level_	ML		weighted	0.35	0.3	0.35	0.24	0.77
ucec_k_fold	somatic mutation (SNP and INDEL)	_mc3_gene_level_	ML	HISTGBOOST	macro	0.71	0.7	0.71	0.7	0.96
ucec_k_fold	somatic mutation (SNP and INDEL)	_mc3_gene_level_	ML		micro	0.85	0.85	0.85	0.85	0.96
ucec_k_fold	somatic mutation (SNP and INDEL)	_mc3_gene_level_	ML		weighted	0.85	0.84	0.85	0.84	0.94
ucec_k_fold	somatic mutation (SNP and INDEL)	_mc3_gene_level_	ML	CATBOOST	macro	0.57	0.62	0.57	0.55	0.92
ucec_k_fold	somatic mutation (SNP and INDEL)	_mc3_gene_level_	ML		micro	0.7	0.7	0.7	0.7	0.92
ucec_k_fold	somatic mutation (SNP and INDEL)	_mc3_gene_level_	ML		weighted	0.7	0.73	0.7	0.66	0.89
ucec_k_fold	somatic mutation (SNP and INDEL)	_mc3_gene_level_	ML	SVM_LINEAR	macro	0.63	0.65	0.63	0.63	0.94
ucec_k_fold	somatic mutation (SNP and INDEL)	_mc3_gene_level_	ML		micro	0.78	0.78	0.78	0.78	0.95
ucec_k_fold	somatic mutation (SNP and INDEL)	_mc3_gene_level_	ML		weighted	0.78	0.78	0.78	0.77	0.92
ucec_k_fold	somatic mutation (SNP and INDEL)	_mc3_gene_level_	ML	BERNOULLI_NB	macro	0.43	0.42	0.43	0.39	0.87
ucec_k_fold	somatic mutation (SNP and INDEL)	_mc3_gene_level_	ML		micro	0.54	0.54	0.54	0.54	0.88
ucec_k_fold	somatic mutation (SNP and INDEL)	_mc3_gene_level_	ML		weighted	0.54	0.45	0.54	0.45	0.79
ucec_k_fold	somatic mutation (SNP and INDEL)	_mc3_gene_level_	ML	LOGISTIC_REGRESSION	macro	0.62	0.65	0.62	0.62	0.94
ucec_k_fold	somatic mutation (SNP and INDEL)	_mc3_gene_level_	ML		micro	0.78	0.78	0.78	0.78	0.94
ucec_k_fold	somatic mutation (SNP and INDEL)	_mc3_gene_level_	ML		weighted	0.78	0.77	0.78	0.76	0.92
ucec_k_fold	somatic mutation (SNP and INDEL)	_mc3_gene_level_	ML	ADA_BOOST	macro	0.62	0.65	0.62	0.61	0.93
ucec_k_fold	somatic mutation (SNP and INDEL)	_mc3_gene_level_	ML		micro	0.74	0.74	0.74	0.74	0.94
ucec_k_fold	somatic mutation (SNP and INDEL)	_mc3_gene_level_	ML		weighted	0.74	0.76	0.74	0.72	0.91
ucec_k_fold	somatic mutation (SNP and INDEL)	_mc3_gene_level_	ML	GBOOST	macro	0.42	0.43	0.42	0.39	0.88
ucec_k_fold	somatic mutation (SNP and INDEL)	_mc3_gene_level_	ML		micro	0.59	0.59	0.59	0.59	0.9
ucec_k_fold	somatic mutation (SNP and INDEL)	_mc3_gene_level_	ML		weighted	0.59	0.57	0.59	0.52	0.82
ucec_k_fold	somatic mutation (SNP and INDEL)	_mc3_gene_level_	ML	XGBOOST	macro	0.72	0.71	0.72	0.71	0.96
ucec_k_fold	somatic mutation (SNP and INDEL)	_mc3_gene_level_	ML		micro	0.86	0.86	0.86	0.86	0.96
ucec_k_fold	somatic mutation (SNP and INDEL)	_mc3_gene_level_	ML		weighted	0.86	0.84	0.86	0.85	0.95
ucec_k_fold	somatic mutation (SNP and INDEL)	_mc3_gene_level_	ML	QUADRATIC_DISCRIMINANT	macro	0.25	0.31	0.25	0.21	0.82
ucec_k_fold	somatic mutation (SNP and INDEL)	_mc3_gene_level_	ML		micro	0.27	0.27	0.27	0.27	0.82
ucec_k_fold	somatic mutation (SNP and INDEL)	_mc3_gene_level_	ML		weighted	0.27	0.39	0.27	0.25	0.83
ucec_k_fold	somatic mutation (SNP and INDEL)	_mc3_gene_level_	ML	MLP	macro	0.54	0.6	0.54	0.54	0.91
ucec_k_fold	somatic mutation (SNP and INDEL)	_mc3_gene_level_	ML		micro	0.69	0.69	0.69	0.69	0.92
ucec_k_fold	somatic mutation (SNP and INDEL)	_mc3_gene_level_	ML		weighted	0.69	0.7	0.69	0.66	0.88
ucec_k_fold	somatic mutation (SNP and INDEL)	_mc3_gene_level_	ML	COMPLEMENT_NB	macro	0.21	0.19	0.21	0.08	0.8
ucec_k_fold	somatic mutation (SNP and INDEL)	_mc3_gene_level_	ML		micro	0.17	0.17	0.17	0.17	0.79
ucec_k_fold	somatic mutation (SNP and INDEL)	_mc3_gene_level_	ML		weighted	0.17	0.27	0.17	0.07	0.84
ucec_k_fold	somatic mutation (SNP and INDEL)	_mc3_gene_level_	ML	RANDOM_FOREST	macro	0.65	0.67	0.65	0.65	0.95
ucec_k_fold	somatic mutation (SNP and INDEL)	_mc3_gene_level_	ML		micro	0.81	0.81	0.81	0.81	0.95
ucec_k_fold	somatic mutation (SNP and INDEL)	_mc3_gene_level_	ML		weighted	0.81	0.8	0.81	0.79	0.93
ucec_k_fold	somatic mutation (SNP and INDEL)	_mc3_gene_level_	ML	DECISION_TREE	macro	0.62	0.63	0.62	0.62	0.93
ucec_k_fold	somatic mutation (SNP and INDEL)	_mc3_gene_level_	ML		micro	0.74	0.74	0.74	0.74	0.94
ucec_k_fold	somatic mutation (SNP and INDEL)	_mc3_gene_level_	ML		weighted	0.74	0.74	0.74	0.74	0.91
ucec_k_fold	miRNA mature strand expression RNAseq	miRNA_GA_gene	DL	DEEPGENE	macro	0.514	0.54	0.514	0.497	0.844
ucec_k_fold	miRNA mature strand expression RNAseq	miRNA_GA_gene	DL		micro	0.583	0.583	0.583	0.583	0.861
ucec_k_fold	miRNA mature strand expression RNAseq	miRNA_GA_gene	DL		weighted	0.583	0.597	0.583	0.562	0.792
ucec_k_fold	miRNA mature strand expression RNAseq	miRNA_GA_gene	DL	CNN	macro	0.568	0.612	0.568	0.566	0.856
ucec_k_fold	miRNA mature strand expression RNAseq	miRNA_GA_gene	DL		micro	0.637	0.637	0.637	0.637	0.879
ucec_k_fold	miRNA mature strand expression RNAseq	miRNA_GA_gene	DL		weighted	0.637	0.612	0.637	0.604	0.786
ucec_k_fold	miRNA mature strand expression RNAseq	miRNA_GA_gene	DL	RESNET34	macro	0.47	0.451	0.47	0.434	0.827
ucec_k_fold	miRNA mature strand expression RNAseq	miRNA_GA_gene	DL		micro	0.553	0.553	0.553	0.553	0.851
ucec_k_fold	miRNA mature strand expression RNAseq	miRNA_GA_gene	DL		weighted	0.553	0.508	0.553	0.496	0.756
ucec_k_fold	miRNA mature strand expression RNAseq	miRNA_GA_gene	DL	CNN_LSTM	macro	0.25	0.109	0.25	0.152	0.75
ucec_k_fold	miRNA mature strand expression RNAseq	miRNA_GA_gene	DL		micro	0.437	0.437	0.437	0.437	0.812
ucec_k_fold	miRNA mature strand expression RNAseq	miRNA_GA_gene	DL		weighted	0.437	0.192	0.437	0.266	0.563
ucec_k_fold	miRNA mature strand expression RNAseq	miRNA_GA_gene	DL	RESNET101	macro	0.409	0.392	0.409	0.345	0.801
ucec_k_fold	miRNA mature strand expression RNAseq	miRNA_GA_gene	DL		micro	0.416	0.416	0.416	0.416	0.805
ucec_k_fold	miRNA mature strand expression RNAseq	miRNA_GA_gene	DL		weighted	0.416	0.455	0.416	0.375	0.787
ucec_k_fold	miRNA mature strand expression RNAseq	miRNA_GA_gene	DL	DENSENET161	macro	0.208	0.115	0.208	0.134	0.729
ucec_k_fold	miRNA mature strand expression RNAseq	miRNA_GA_gene	DL		micro	0.312	0.312	0.312	0.312	0.771
ucec_k_fold	miRNA mature strand expression RNAseq	miRNA_GA_gene	DL		weighted	0.312	0.172	0.312	0.205	0.604
ucec_k_fold	miRNA mature strand expression RNAseq	miRNA_GA_gene	DL	LSTM	macro	0.28	0.189	0.28	0.198	0.768
ucec_k_fold	miRNA mature strand expression RNAseq	miRNA_GA_gene	DL		micro	0.469	0.469	0.469	0.469	0.823
ucec_k_fold	miRNA mature strand expression RNAseq	miRNA_GA_gene	DL		weighted	0.469	0.283	0.469	0.321	0.603
ucec_k_fold	miRNA mature strand expression RNAseq	miRNA_GA_gene	DL	RESNET50	macro	0.423	0.42	0.423	0.377	0.816
ucec_k_fold	miRNA mature strand expression RNAseq	miRNA_GA_gene	DL		micro	0.488	0.488	0.488	0.488	0.829
ucec_k_fold	miRNA mature strand expression RNAseq	miRNA_GA_gene	DL		weighted	0.488	0.489	0.488	0.452	0.777
ucec_k_fold	miRNA mature strand expression RNAseq	miRNA_GA_gene	DL	RNN	macro	0.42	0.456	0.42	0.383	0.818
ucec_k_fold	miRNA mature strand expression RNAseq	miRNA_GA_gene	DL		micro	0.553	0.553	0.553	0.553	0.851
ucec_k_fold	miRNA mature strand expression RNAseq	miRNA_GA_gene	DL		weighted	0.553	0.52	0.553	0.479	0.719
ucec_k_fold	miRNA mature strand expression RNAseq	miRNA_GA_gene	DL	CNN_GRU	macro	0.25	0.109	0.25	0.152	0.75
ucec_k_fold	miRNA mature strand expression RNAseq	miRNA_GA_gene	DL		micro	0.437	0.437	0.437	0.437	0.812
ucec_k_fold	miRNA mature strand expression RNAseq	miRNA_GA_gene	DL		weighted	0.437	0.192	0.437	0.266	0.563
ucec_k_fold	miRNA mature strand expression RNAseq	miRNA_GA_gene	DL	RESNET18	macro	0.415	0.347	0.415	0.328	0.81
ucec_k_fold	miRNA mature strand expression RNAseq	miRNA_GA_gene	DL		micro	0.425	0.425	0.425	0.425	0.808
ucec_k_fold	miRNA mature strand expression RNAseq	miRNA_GA_gene	DL		weighted	0.425	0.387	0.425	0.358	0.816
ucec_k_fold	miRNA mature strand expression RNAseq	miRNA_GA_gene	DL	NN	macro	0.424	0.466	0.424	0.413	0.811
ucec_k_fold	miRNA mature strand expression RNAseq	miRNA_GA_gene	DL		micro	0.531	0.531	0.531	0.531	0.844
ucec_k_fold	miRNA mature strand expression RNAseq	miRNA_GA_gene	DL		weighted	0.531	0.49	0.531	0.479	0.713
ucec_k_fold	miRNA mature strand expression RNAseq	miRNA_GA_gene	DL	DENSENET201	macro	0.279	0.206	0.279	0.208	0.766
ucec_k_fold	miRNA mature strand expression RNAseq	miRNA_GA_gene	DL		micro	0.352	0.352	0.352	0.352	0.784
ucec_k_fold	miRNA mature strand expression RNAseq	miRNA_GA_gene	DL		weighted	0.352	0.262	0.352	0.275	0.712
ucec_k_fold	miRNA mature strand expression RNAseq	miRNA_GA_gene	DL	GRU	macro	0.426	0.404	0.426	0.393	0.831
[truncated: 13,424 more rows]
